# Supplementary material for: Catalytic asymmetric synthesis of chiral thiohydantoins via the domino cyclization reaction of β,γ-unsaturated α-ketoesters and N,N′-dialkylthiourea
Source: Royal Society of Chemistry journal article supplement (doi:10.1039/d2qo00669c), 2022-01-01
Supplement: d2qo00669c1.pdf [file d2qo00669c1.pdf]

## Supporting Information for

### Catalytic Asymmetric Synthesis of Chiral Thiohydantoins via Domino Cyclization Reaction of $\beta,\gamma$ -Unsaturated $\alpha$ -Ketoester and $N,N'$ -Dialkylthiourea

Meng-Cheng Zhang,<sup>a</sup> Dong-Chao Wang,<sup>\*b</sup> Gui-Rong Qu,<sup>b</sup> and Hai-Ming Guo<sup>\*a,b</sup>

<sup>a</sup> School of Environment, Henan Normal University, Xinxiang, Henan Province 453007, China

<sup>b</sup> NMPA Key Laboratory for Research and Evaluation of Innovative Drug, Key Laboratory of Green Chemical Media and Reactions, Ministry of Education, Collaborative Innovation Center of Henan Province for Green Manufacturing of Fine Chemicals, School of Chemistry and Chemical Engineering, Henan Normal University, Xinxiang, Henan 453007, China

#### Contents

|                                                                                |     |
|--------------------------------------------------------------------------------|-----|
| 1. General information.....                                                    | S2  |
| 2. Table Screening of the reaction conditions.....                             | S3  |
| 3. General procedure for consturct chiral thiohydantoins.....                  | S3  |
| 4. Synthesis of reaction intermediates <b>1aa</b> .....                        | S4  |
| 5. Transformation of products.....                                             | S4  |
| 6. The X-ray data for thiohydantoin <i>rac</i> - <b>3a</b> and <b>5a</b> ..... | S6  |
| 7. The analytical and spectral characterization data for products.....         | S9  |
| 8. Reference.....                                                              | S20 |
| 9. Copies of NMR spectra for the adducts.....                                  | S21 |
| 10. Copies of HPLC spectra for racemic and chiral compounds.....               | S47 |

## 1. General information

All reactions were carried out in oven-dried Schlenk, and monitored by thin layer chromatography (TLC). All reagents were reagent grade quality and purchased from commercial sources unless otherwise indicated. NMR spectra were recorded with a 600 MHz or 400 MHz spectrometer for  $^1\text{H}$  NMR, 150 MHz or 100 MHz for  $^{13}\text{C}$  NMR. Chemical shifts  $\delta$  are given in ppm relative to the residual proton signals of the deuterated solvent  $\text{CDCl}_3$  for  $^1\text{H}$  and  $^{13}\text{C}$  NMR. Multiplicities are reported as follows: singlet (s), doublet (d), doublet of doublets (dd), triplet (t), multiplet (m), sextet (sext). High resolution mass spectra were recorded on a 3000 mass spectrometer. For column chromatography, silica gel (200-300 mesh) was used as the stationary phase. Chiral HPLC analysis recorded on Thermo scientific Dionex Ultimate 3000. Optical rotations were reported as follows:  $[\alpha]_{\text{D}}^{\text{T}}$  (c: g/100 mL, in solvent). Optical rotations recorded on Autopol Automatic Polarimeter. HRMS was recorded on an ABI/Sciex QStar Mass Spectrometer (ESI).

## 2. Screening of the reaction conditions

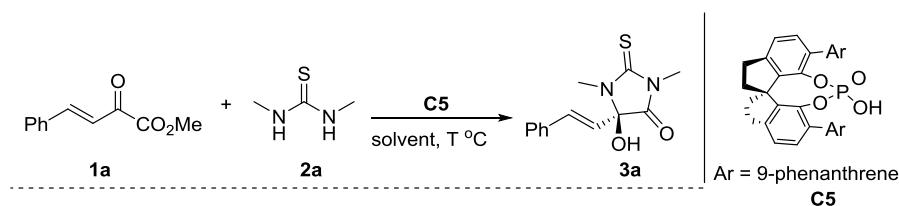

| Entry           | Solvent            | T °C   | Additive                        | Yield <sup>b</sup> (%) | ee <sup>c</sup> (%) |
|-----------------|--------------------|--------|---------------------------------|------------------------|---------------------|
| 1               | CHCl <sub>3</sub>  | RT     |                                 | 52                     | 88                  |
| 2               | CH <sub>3</sub> OH | RT     |                                 | Trace                  |                     |
| 3               | H <sub>2</sub> O   | RT     |                                 | NR                     |                     |
| 4               | Dioxane            | RT     |                                 | NR                     |                     |
| 5               | CH <sub>3</sub> CN | RT     |                                 | 15                     | 88                  |
| 6               | EtOAc              | RT     |                                 | 23                     | 85                  |
| 7               | DCM                | RT     | K <sub>2</sub> CO <sub>3</sub>  | 98                     | 0                   |
| 8               | DCM                | RT     | Na <sub>2</sub> CO <sub>3</sub> | 97                     | 0                   |
| 9               | DCM                | RT     | CF <sub>3</sub> COOH            | 95                     | 0                   |
| 10              | DCM                | RT     | CH <sub>3</sub> COOH            | 93                     | 0                   |
| 11              | DCM                | RT     | HCOOH                           | 93                     | 0                   |
| 12              | DCM                | RT     | Citric acid                     | 95                     | 0                   |
| 13 <sup>d</sup> | DCM                | RT     | 5 Å MS                          | 83                     | 97                  |
| 14 <sup>e</sup> | DCM                | 0 °C   | 5 Å MS                          | 63                     | 92                  |
| 15 <sup>f</sup> | DCM                | -20 °C | 5 Å MS                          | 58                     | 92                  |

<sup>a</sup>Unless otherwise noted, the reaction conditions were as follows: Cat. (20 mol%), **1a** (0.1 mmol), **2a** (0.4 mmol), and additive (1 equiv) in solvent (2 mL) at room temperature for 24 h. <sup>b</sup>Isolated yields.

<sup>c</sup>Determined by chiral HPLC analysis. <sup>d</sup>Under N<sub>2</sub>. <sup>e</sup>At 0 °C. <sup>f</sup>At -20 °C.

## 3. General procedure for constrect chiral thiohydantoin

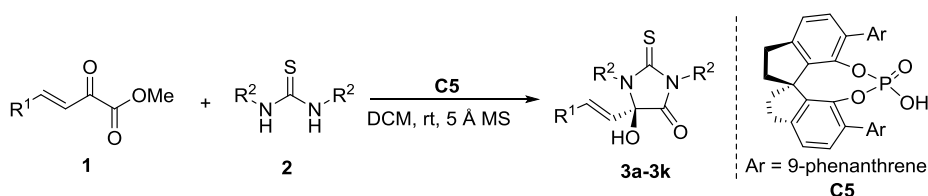

In a test tube, *N,N'*-dialkylthiourea **2** (0.4 mmol), **C5** (0.02 mmol, 20 mol %), 5 Å MS (40 mg) and  $\beta,\gamma$ -unsaturated  $\alpha$ -ketoester **1** (0.1 mmol) were added. Then, DCM (1.0 mL) was added and the mixture was stirred at room temperature until **1** was consumed (determined by TLC). Then the solvent was removed and the mixture was purified by preparation of thin layer chromatography silica gel plate (PE/EA = 3:1) or flash column chromatography (PE/EA = 5:1) to afford the products.

#### 4. Synthesis of reaction intermediates **1aa**

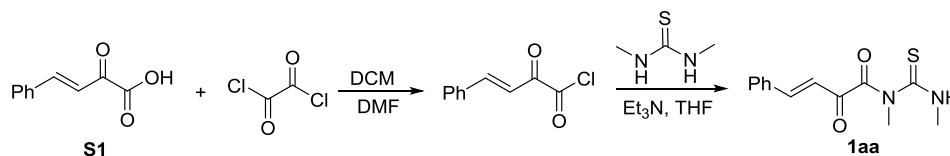

**1aa** were synthesized from **S1** according to the literature procedure. <sup>[1-2]</sup>

#### 5. Transformation of products

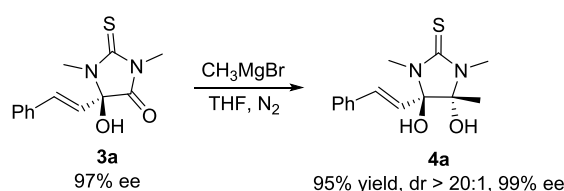

Compound **4a** was prepared according to the reported procedures.<sup>[3]</sup> To a Schlenk tube equipped with a magnetic stir bar, compound **3a** (26.2 mg, 0.1 mmol, 97% ee) were added. The tube was evacuated and backfilled with N<sub>2</sub> for 3 times and then charged with dry THF (2.0 mL) via syringe. To above stirred solution was added methyl magnesium bromide (0.3 mL of 1.0 M solution in THF, 3.0 equiv) slowly and the reaction was stirred at room temperature for 3.0 h. After the reaction was complete (monitored by TLC). The crude product was quenched with saturated aqueous NaHCO<sub>3</sub>, and extracted with ethyl acetate (3 × 10 mL). The combined organic phases were dried and concentrated. Then the residue was purified by silica gel column chromatography (petroleum ether /ethyl acetate = 3/1) to afford product **4a** as a white solid.

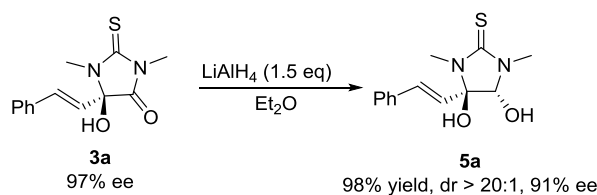

Compound **5a** was prepared according to the reported procedures.<sup>[4]</sup> LiAlH<sub>4</sub> (5.7 mg, 0.15 mmol) was added to a solution of **3a** (26.2 mg, 0.1 mmol, 97% ee) in anhydrous Et<sub>2</sub>O (1.5 mL). The reaction mixture was stirred at room temperature for 1.0 h and the reaction was monitored by TLC. Upon completion, the solvents were removed in vacuo. The crude product was then purified by preparative thin layer chromatography (petroleum ether /ethyl acetate = 3/1) to afford product **5a** as a white solid.

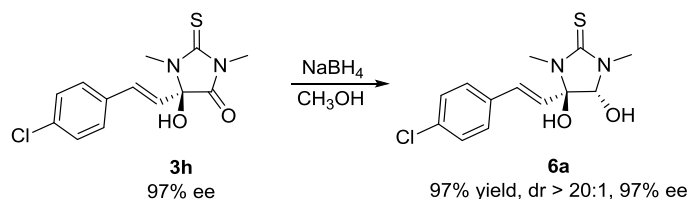

Compound **7a** was prepared according to the reported procedures.<sup>[3]</sup> To a solution of **3h** (29.6 mg, 0.1 mmol, 97% ee) in MeOH, NaBH<sub>4</sub> (11.3 mg, 0.3 mmol, 3.0 equiv) was added at the room temperature for 2.0 h. After **3h** was consumed (determined by TLC), saturated NH<sub>4</sub>Cl aqueous solution (2 mL) was added. The aqueous phase was extracted with ethyl acetate (3 × 10 mL) and the combined organic phases were dried and concentrated. The residue was purified by column chromatography (petroleum ether /ethyl acetate = 3/1) to afford product **6a** as a white solid.

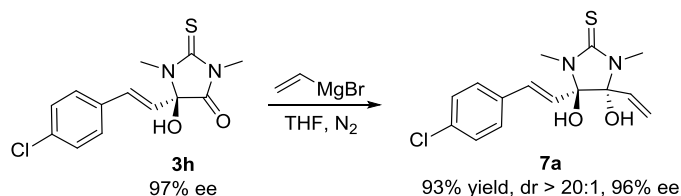

Compound **7a** was prepared according to the reported procedures.<sup>[4]</sup> To a Schlenk tube equipped with a magnetic stir bar, compound **3h** (29.6 mg, 0.1 mmol, 97% ee) were added. The tube was evacuated and backfilled with N<sub>2</sub> for 3 times and then charged with dry THF (2.0 mL) via syringe. To above stirred solution was added vinyl magnesium bromide (0.3 mL of 1.0 M solution in THF, 0.3 mmol, 3.0 equiv) slowly and the reaction was stirred at room temperature for 3.0 h. After the reaction was complete (monitored by TLC). The crude product was quenched with saturated aqueous NaHCO<sub>3</sub>, and extracted with ethyl acetate (3 × 10 mL). The combined organic phases were dried and concentrated. Then the residue was purified by silica gel column chromatography (petroleum ether /ethyl acetate = 3/1) to afford product **7a** as a white solid.

#### Configurational stability assessment of **3a** and **4a** in basic and acidic conditions

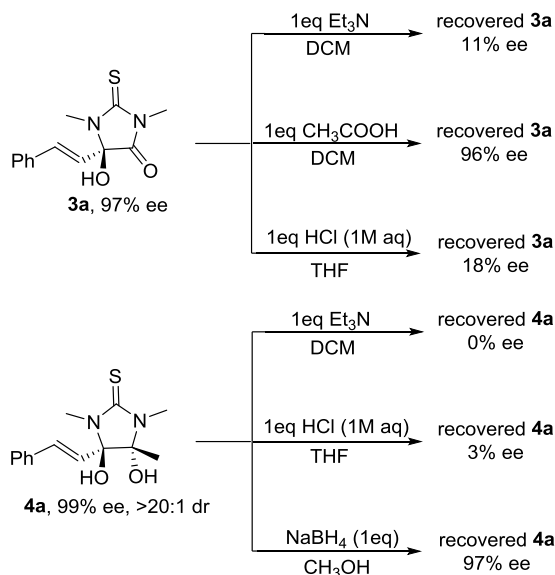

The configurational stability of **3a** and **4a** were tested in basic and acidic conditions. Treated with Et<sub>3</sub>N and 1.0 M hydrochloric acid, **3a** was almost racemic. Treated with CH<sub>3</sub>COOH, the ee value of recovered compound **3a** was maintained. Hydrochloric acid and Et<sub>3</sub>N all could racemize **4a**. However, the ee value of **4a** is maintained by treatment with NaBH<sub>4</sub>.

## 6. The X-ray data for thiohydantoin *rac*-**3a** and **5a** and **7a**

Recrystallization in petroleum ether/dichloromethane/ diethyl ether afforded crystals suitable for X-ray analysis.

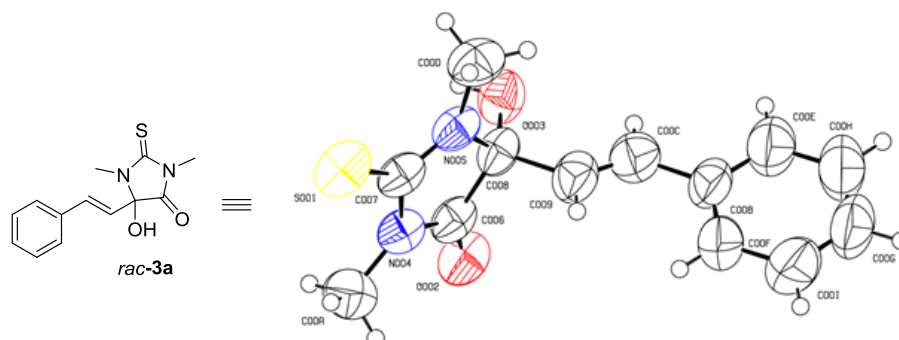

A single-crystal X-ray diffraction data for *rac*-**3a** was collected on a Supernova Atlas S2 CCD detector with graphite-monochromated Mo K $\alpha$  radiation ( $\lambda = 0.71073 \text{ \AA}$ ) at room temperature. The unit cell parameters and the data reduction were obtained with the CrysAlisPro software. During data processing a data scaling and empirical or multi-scan absorption corrections were also performed with CrysAlisPro software.

CCDC 2102585 (*rac*-**3a**) contains the supplementary crystallographic data for this paper. These data can be obtained free of charge from The Cambridge Crystallographic Data Centre via [www.ccdc.cam.ac.uk/data\\_request/cif](http://www.ccdc.cam.ac.uk/data_request/cif)

**Table 1 Crystal data and structure refinement for *rac*-**3a****

|                                  |                                                                 |
|----------------------------------|-----------------------------------------------------------------|
| Identification code              | <i>rac</i> - <b>3a</b>                                          |
| Empirical formula                | C <sub>13</sub> H <sub>14</sub> N <sub>2</sub> O <sub>2</sub> S |
| Formula weight                   | 262.32                                                          |
| Temperature/K                    | 294.78(10)                                                      |
| Crystal system                   | monoclinic                                                      |
| Space group                      | P21/c                                                           |
| a/ $\text{\AA}$                  | 13.7357(9)                                                      |
| b/ $\text{\AA}$                  | 15.0653(8)                                                      |
| c/ $\text{\AA}$                  | 6.8017(4)                                                       |
| $\alpha$ / $^\circ$              | 90                                                              |
| $\beta$ / $^\circ$               | 92.185(6)                                                       |
| $\gamma$ / $^\circ$              | 90                                                              |
| Volume/ $\text{\AA}^3$           | 1406.47(14)                                                     |
| Z                                | 4                                                               |
| $\rho_{\text{calc}}/\text{cm}^3$ | 1.239                                                           |
| $\mu/\text{mm}^{-1}$             | 0.226                                                           |
| F(000)                           | 552.0                                                           |

|                                                          |                                                               |
|----------------------------------------------------------|---------------------------------------------------------------|
| Crystal size/mm <sup>3</sup>                             | 0.38 × 0.18 × 0.09                                            |
| Radiation                                                | Mo K $\alpha$ ( $\lambda$ = 0.71073)                          |
| 2 $\theta$ range for data collection/                    | 6.576 to 59.332                                               |
| Index ranges                                             | -13 ≤ h ≤ 18, -20 ≤ k ≤ 15, -9 ≤ l ≤ 8                        |
| Reflections collected                                    | 11515                                                         |
| Independent reflections                                  | 3451 [R <sub>int</sub> = 0.0446, R <sub>sigma</sub> = 0.0522] |
| Data/restraints/parameters                               | 3451/0/166                                                    |
| Goodness-of-fit on F <sup>2</sup>                        | 1.026                                                         |
| Final R indexes [I ≥ 2 $\sigma$ (I)]                     | R <sub>1</sub> = 0.0805, wR <sub>2</sub> = 0.1854             |
| Final R indexes [all data]                               | R <sub>1</sub> = 0.1505, wR <sub>2</sub> = 0.2240             |
| Largest diff. peak/hole / e <sup>-</sup> Å <sup>-3</sup> | 0.60/-0.24                                                    |

Recrystallization in petroleum ether/dichloromethane/ diethyl ether afforded crystals suitable for X-ray analysis.

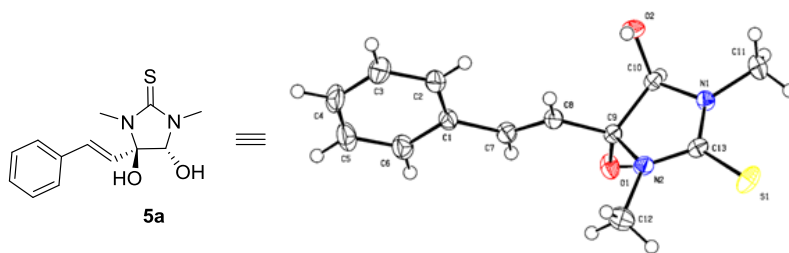

Single-crystal X-ray diffraction data for **5a** (C<sub>13</sub>H<sub>16</sub>N<sub>2</sub>O<sub>2</sub>S) was collected on a Supernova Atlas S2 CCD detector with graphite-monochromated Cu K $\alpha$  radiation ( $\lambda$  = 1.54184 Å) at rt. The unit cell parameters and the data reduction were obtained with the CrysAlisPro software. During data processing a data scaling and empirical or multi-scan absorption corrections were also performed with CrysAlisPro software. The structure was solved with the ShelXT structure solution program using Direct Methods and refined with the ShelXL refinement package using Least Squares minimization.

CCDC 2131212 (**5a**) contains the supplementary crystallographic data for this paper. These data can be obtained free of charge from The Cambridge Crystallographic Data Centre via [www.ccdc.cam.ac.uk/data\\_request/cif](http://www.ccdc.cam.ac.uk/data_request/cif)

**Table 1 Crystal data and structure refinement for 5a**

|                     |                                                                 |
|---------------------|-----------------------------------------------------------------|
| Identification code | <b>5a</b>                                                       |
| Empirical formula   | C <sub>13</sub> H <sub>16</sub> N <sub>2</sub> O <sub>2</sub> S |
| Formula weight      | 264.34                                                          |
| Temperature/K       | 169.99(10)                                                      |
| Crystal system      | monoclinic                                                      |
| Space group         | P21                                                             |
| a/Å                 | 7.66580(10)                                                     |
| b/Å                 | 7.56550(10)                                                     |

|                                                |                                                                |
|------------------------------------------------|----------------------------------------------------------------|
| $c/\text{\AA}$                                 | 12.02920(10)                                                   |
| $\alpha/^\circ$                                | 90                                                             |
| $\beta/^\circ$                                 | 94.0280(10)                                                    |
| $\gamma/^\circ$                                | 90                                                             |
| Volume/ $\text{\AA}^3$                         | 695.918(14)                                                    |
| Z                                              | 2                                                              |
| $\rho_{\text{calc}}/\text{cm}^3$               | 1.261                                                          |
| $\mu/\text{mm}^{-1}$                           | 2.041                                                          |
| F(000)                                         | 280.0                                                          |
| Crystal size/ $\text{mm}^3$                    | 0.13 $\times$ 0.12 $\times$ 0.11                               |
| Radiation                                      | Cu K $\alpha$ ( $\lambda = 1.54184$ )                          |
| 2 $\Theta$ range for data collection/ $^\circ$ | 7.368 to 143.106                                               |
| Index ranges                                   | $-9 \leq h \leq 8$ , $-9 \leq k \leq 9$ , $-14 \leq l \leq 14$ |
| Reflections collected                          | 15527                                                          |
| Independent reflections                        | 2687 [Rint = 0.0527, Rsigma = 0.0309]                          |
| Data/restraints/parameters                     | 2687/1/167                                                     |
| Goodness-of-fit on F2                          | 1.104                                                          |
| Final R indexes [ $I \geq 2\sigma(I)$ ]        | $R_1 = 0.0520$ , $wR_2 = 0.1415$                               |
| Final R indexes [all data]                     | $R_1 = 0.0537$ , $wR_2 = 0.1432$                               |
| Largest diff. peak/hole / $e \text{\AA}^{-3}$  | 0.29/-0.25                                                     |
| Flack/Hooft parameter                          | 0.00(4)/-0.003(8)                                              |

Recrystallization in petroleum ether/dichloromethane/ diethyl ether afforded crystals suitable for X-ray analysis.

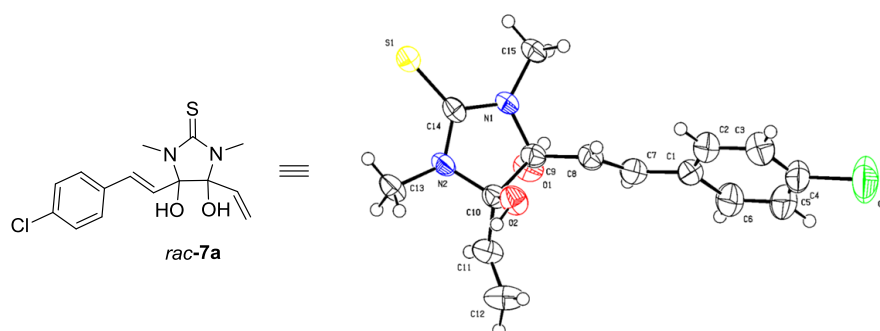

A single-crystal X-ray diffraction data for *rac-7a* was collected on a Supernova Atlas S2 CCD detector with graphite-monochromated Cu K $\alpha$  radiation ( $\lambda = 1.54184 \text{ \AA}$ ) at room temperature. The unit cell parameters and the data reduction were obtained with the CrysAlisPro software. During data processing a data scaling and empirical or multi-scan absorption corrections were also performed with CrysAlisPro software.

CCDC 2164313 (*rac-7a*) contains the supplementary crystallographic data for this paper. These data can be obtained free of charge from The Cambridge Crystallographic Data Centre via



**Table 1 Crystal data and structure refinement for *rac*-7a.**

|                                                              |                                                                              |
|--------------------------------------------------------------|------------------------------------------------------------------------------|
| Identification code                                          | <i>rac</i> -7a                                                               |
| Empirical formula                                            | C <sub>15</sub> H <sub>17</sub> ClN <sub>2</sub> O <sub>2</sub> S            |
| Formula weight                                               | 324.81                                                                       |
| Temperature/K                                                | 293(2)                                                                       |
| Crystal system                                               | monoclinic                                                                   |
| Space group                                                  | P2 <sub>1</sub> /c                                                           |
| <i>a</i> /Å                                                  | 14.5771(3)                                                                   |
| <i>b</i> /Å                                                  | 8.1384(2)                                                                    |
| <i>c</i> /Å                                                  | 14.3128(3)                                                                   |
| $\alpha$ /°                                                  | 90                                                                           |
| $\beta$ /°                                                   | 109.039(2)                                                                   |
| $\gamma$ /°                                                  | 90                                                                           |
| Volume/Å <sup>3</sup>                                        | 1605.10(6)                                                                   |
| <i>Z</i>                                                     | 4                                                                            |
| $\rho_{\text{calc}}$ /cm <sup>3</sup>                        | 1.344                                                                        |
| $\mu$ /mm <sup>-1</sup>                                      | 3.370                                                                        |
| <i>F</i> (000)                                               | 680.0                                                                        |
| Crystal size/mm <sup>3</sup>                                 | 0.14 × 0.12 × 0.1                                                            |
| Radiation                                                    | Cu K $\alpha$ ( $\lambda$ = 1.54184)                                         |
| 2 $\Theta$ range for data collection/°                       | 12.632 to 142.748                                                            |
| Index ranges                                                 | -17 ≤ <i>h</i> ≤ 15, -9 ≤ <i>k</i> ≤ 8, -17 ≤ <i>l</i> ≤ 17                  |
| Reflections collected                                        | 7394                                                                         |
| Independent reflections                                      | 3060 [ <i>R</i> <sub>int</sub> = 0.0436, <i>R</i> <sub>sigma</sub> = 0.0438] |
| Data/restraints/parameters                                   | 3060/0/194                                                                   |
| Goodness-of-fit on <i>F</i> <sup>2</sup>                     | 0.997                                                                        |
| Final <i>R</i> indexes [ <i>I</i> ≥ 2 $\sigma$ ( <i>I</i> )] | <i>R</i> <sub>1</sub> = 0.0659, <i>wR</i> <sub>2</sub> = 0.1923              |
| Final <i>R</i> indexes [all data]                            | <i>R</i> <sub>1</sub> = 0.0754, <i>wR</i> <sub>2</sub> = 0.1985              |
| Largest diff. peak/hole / e Å <sup>-3</sup>                  | 0.53/-0.70                                                                   |

## 7. The analytical and spectral characterization data for products

### (*E*)-*N*-methyl-*N*-(methylcarbamothioyl)-2-oxo-4-phenylbut-3-enamide (1aa)

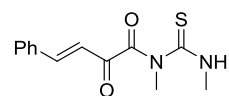

Light yellow solid.

**TLC:** *R*<sub>f</sub> = 0.45 (petroleum ether/ethyl acetate = 5:1) [UV].

**<sup>1</sup>H NMR** (600 MHz, CDCl<sub>3</sub>) δ 7.42 – 7.38 (m, 2H), 7.37 – 7.30 (m, 3H), 6.92 (d, *J* = 15.6 Hz, 1H), 6.04 (d, *J* = 16.2 Hz, 1H), 3.30 (s, 3H), 3.24 (s, 3H).  
**<sup>13</sup>C NMR** (150 MHz, CDCl<sub>3</sub>) δ 182.1, 172.6, 135.8, 134.6, 129.2, 128.8, 127.2, 121.0, 86.8, 29.3, 28.3.

**(*E*)-*N*-(dimethylcarbamothioyl)-*N*-methyl-2-oxo-4-phenylbut-3-enamide (1ab)**

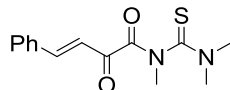

Yellow oil.

**TLC:** *R*<sub>f</sub> = 0.60 (petroleum ether/ethyl acetate = 10:1) [UV].

**<sup>1</sup>H NMR** (600 MHz, CDCl<sub>3</sub>) δ 7.44 – 7.40 (m, 2H), 7.36 – 7.32 (m, 2H), 7.31 – 7.27 (m, 1H), 6.97 (d, *J* = 16.2 Hz, 1H), 6.11 (d, *J* = 16.2 Hz, 1H), 3.81 (s, 3H), 3.35 (s, 6H).

**<sup>13</sup>C NMR** (150 MHz, CDCl<sub>3</sub>) δ 169.1, 135.6, 135.5, 128.8, 128.7, 127.1, 124.6, 100.8, 53.0, 50.5.

**(*R*, *E*)-5-hydroxy-1,3-dimethyl-5-styryl-2-thioxoimidazolidin-4-one (3a)**

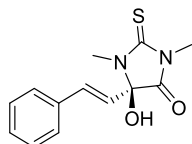

White solid, m.p. = 112.8-113.2 °C. 19.6 mg, 83% yield, 97% ee. HPLC CHIRALCEL OD-H, n-hexane/2-propanol = 95/5, flow rate = 0.6 mL/min, λ = 250 nm, retention time: 22.501 min (major), 26.942 min (minor). [*α*]<sub>D</sub><sup>23</sup> = 90.3 (c = 0.48, CH<sub>2</sub>Cl<sub>2</sub>).

**TLC:** *R*<sub>f</sub> = 0.50 (petroleum ether/ethyl acetate = 5:1) [UV].

**<sup>1</sup>H NMR** (600 MHz, CDCl<sub>3</sub>) δ 7.40 – 7.38 (m, 2H), 7.35 – 7.29 (m, 3H), 6.91 (d, *J* = 15.6 Hz, 1H), 6.03 (d, *J* = 16.2 Hz, 1H), 4.32 (s, 1H), 3.29 (s, 3H), 3.23 (s, 3H).

**<sup>13</sup>C NMR** (150 MHz, CDCl<sub>3</sub>) δ 182.1, 172.8, 135.9, 134.6, 129.2, 128.8, 127.2, 120.9, 86.9, 29.3, 28.3.

**HRMS** (ESI): exact mass calcd for C<sub>13</sub>H<sub>14</sub>N<sub>2</sub>O<sub>2</sub>SNa [M+Na]<sup>+</sup> requires *m/z* 258.0668, found *m/z* 258.0673

**(*R*, *E*)-1,3-diethyl-5-hydroxy-5-styryl-2-thioxoimidazolidin-4-one (3b)**

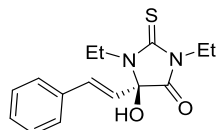

White solid, m.p. = 122.8-124.2 °C. 18.1 mg, 63% yield, 91% ee. HPLC CHIRALCEL OD-H, n-hexane/2-propanol = 95/5, flow rate = 0.6 mL/min, λ = 254 nm, retention time: 16.712min (minor), 20.975 min (major). [*α*]<sub>D</sub><sup>23</sup> = 78.5 (c = 0.25, CH<sub>2</sub>Cl<sub>2</sub>).

**TLC:** *R*<sub>f</sub> = 0.55 (petroleum ether/ethyl acetate = 5:1) [UV].

**<sup>1</sup>H NMR** (600 MHz, CDCl<sub>3</sub>) δ 7.41 – 7.37 (m, 2H), 7.36 – 7.29 (m, 3H), 6.96 (d, *J* = 15.6 Hz, 1H), 6.00 (d, *J* = 15.6 Hz, 1H), 4.34 (s, 1H), 3.97 – 3.84 (m, 3H), 3.63 (sext, *J* = 7.2 Hz, 1H), 1.32 (t, *J* = 6.6 Hz, 3H), 1.25 (t, *J* = 7.2 Hz, 3H).

**<sup>13</sup>C NMR** (150 MHz, CDCl<sub>3</sub>) δ 180.9, 172.7, 135.6, 134.8, 129.1, 128.9, 127.2, 121.6, 87.3, 38.7, 36.9,

13.9, 13.1.

**HRMS** (ESI): exact mass calcd for  $C_{15}H_{18}N_2O_2SNa$  ( $M+Na$ )<sup>+</sup> requires  $m/z$  313.0981, found  $m/z$  313.0980.

**(R, E)-1,3-dibenzyl-5-hydroxy-5-styryl-2-thioxoimidazolidin-4-one (3c)**

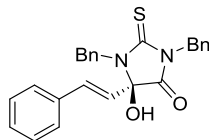

White solid, m.p. = 138.3-139.6 °C. 21.5 mg, 47% yield, 92% ee. HPLC CHIRALCEL IE, n-hexane/2-propanol = 95/15, flow rate = 0.6 mL/min,  $\lambda$  = 254 nm, retention time: 31.601 min (minor), 36.871 min (major).  $[\alpha]_D^{23}$  = 54.2 (c = 0.21,  $CH_2Cl_2$ ).

**TLC**:  $R_f$  = 0.56 (petroleum ether/ethyl acetate = 5:1) [UV].

**<sup>1</sup>H NMR** (600 MHz,  $CDCl_3$ )  $\delta$  7.46 (d,  $J$  = 7.2 Hz, 2H), 7.42 (d,  $J$  = 7.2 Hz, 2H), 7.32 – 7.29 (m, 3H), 7.28 – 7.24 (m, 5H), 7.23 – 7.21 (m, 1H), 7.16 – 7.15 (m, 2H), 6.89 (d,  $J$  = 15.6 Hz, 1H), 5.82 (d,  $J$  = 16.2 Hz, 1H), 5.08 (dd,  $J$  = 14.4 Hz, 22.8 Hz, 2H), 5.00 (dd,  $J$  = 15.0 Hz, 33.6 Hz, 2H), 3.64 (s, 1H).

**<sup>13</sup>C NMR** (150 MHz,  $CDCl_3$ )  $\delta$  136.7, 135.7, 134.7, 129.0, 128.7, 128.6, 128.5, 127.9, 127.7, 127.2, 121.8, 87.2, 46.9, 45.4.

**HRMS** (ESI): exact mass calcd for  $C_{25}H_{22}N_2O_2SNa$  ( $M+Na$ )<sup>+</sup> requires  $m/z$  437.1294, found  $m/z$  437.1298.

**(R, E)-5-(2-fluorostyryl)-5-hydroxy-1,3-dimethyl-2-thioxoimidazolidin-4-one (3d)**

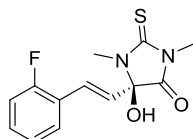

Colorless oil, 21.1 mg, 75% yield, 91% ee. HPLC CHIRALCEL OJ, n-hexane/2-propanol = 90/10, flow rate = 0.6 mL/min,  $\lambda$  = 254 nm, retention time: 26.924min (major), 31.687 min (minor).  $[\alpha]_D^{23}$  = 6.5 (c = 0.40,  $CH_2Cl_2$ ).

**TLC**:  $R_f$  = 0.45 (petroleum ether/ethyl acetate = 5:1) [UV].

**<sup>1</sup>H NMR** (600 MHz,  $CDCl_3$ )  $\delta$  7.41 (t,  $J$  = 7.8 Hz, 1H), 7.28 – 7.26 (m, 1H), 7.11 (t,  $J$  = 7.8 Hz, 1H), 7.07 – 7.04 (m, 2H), 6.14 (d,  $J$  = 16.2, 1H), 4.71 (s, 1H), 3.28 (s, 3H), 3.22 (s, 3H).

**<sup>13</sup>C NMR** (150 MHz,  $CDCl_3$ )  $\delta$  182.1, 172.9, 161.5, 159.8, 130.6 (d,  $J_{C-F}$  = 7.9 Hz), 128.8 (d,  $J_{C-F}$  = 3.1 Hz), 128.5 (d,  $J_{C-F}$  = 3.3 Hz), 124.3 (d,  $J_{C-F}$  = 3.3 Hz), 123.7 (d,  $J_{C-F}$  = 6.4 Hz), 122.6 (d,  $J_{C-F}$  = 11.8 Hz), 116.1 (d,  $J_{C-F}$  = 22.5 Hz) 86.9, 29.3, 28.3.

**HRMS** (ESI): exact mass calcd for  $C_{13}H_{14}FN_2O_2S$  ( $M+H$ )<sup>+</sup> requires  $m/z$  281.0755, found  $m/z$  281.0760

**(R, E)-5-(2-chlorostyryl)-5-hydroxy-1,3-dimethyl-2-thioxoimidazolidin-4-one (3e)**

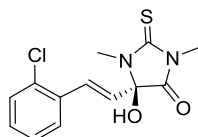

Colorless oil, 19.4 mg, 66 yield, 92% ee. HPLC CHIRALCEL ID, n-hexane/2-propanol = 95/5, flow rate = 0.5 mL/min,  $\lambda = 254$  nm, retention time: 16.425 min (minor), 20.865 min (major).  $[\alpha]_{\text{D}}^{23} = 22.4$  ( $c = 0.26$ ,  $\text{CH}_2\text{Cl}_2$ ).

**TLC:**  $R_f = 0.50$  (petroleum ether/ethyl acetate = 5:1) [UV].

**$^1\text{H NMR}$**  (600 MHz,  $\text{CDCl}_3$ )  $\delta$  7.49 – 7.48 (m, 1H), 7.37 – 7.36 (d,  $J = 15.6$  Hz, 2H), 7.26 – 7.23 (m, 1H), 6.03 (d,  $J = 15.6$ , 1H), 4.61 (s, 1H), 3.29 (s, 3H), 3.25 (s, 3H).

**$^{13}\text{C NMR}$**  (150 MHz,  $\text{CDCl}_3$ )  $\delta$  182.1, 172.8, 133.9, 132.9, 132.2, 130.1, 129.9, 127.4, 127.1, 123.9, 86.8, 29.4, 28.4.

**HRMS** (ESI): exact mass calcd for  $\text{C}_{13}\text{H}_{14}\text{ClN}_2\text{O}_2\text{S}$  ( $\text{M}+\text{H}$ )<sup>+</sup> requires  $m/z$  297.0459, found  $m/z$  297.0468.

**(*R, E*)-5-(4-fluorostyryl)-5-hydroxy-1,3-dimethyl-2-thioxoimidazolidin-4-one (3f)**

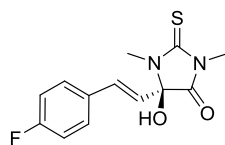

White solid, m.p. = 112.8-113.2 °C. 21.1 mg, 75% yield, 96% ee. HPLC CHIRALCEL AD-H, n-hexane/2-propanol = 90/10, flow rate = 0.6 mL/min,  $\lambda = 254$  nm, retention time: 14.050min (major), 18.322 min (minor).  $[\alpha]_{\text{D}}^{23} = 18.7$  ( $c = 0.18$ ,  $\text{CH}_2\text{Cl}_2$ ).

**TLC:**  $R_f = 0.50$  (petroleum ether/ethyl acetate = 5:1) [UV].

**$^1\text{H NMR}$**  (600 MHz,  $\text{CDCl}_3$ )  $\delta$  7.40 – 7.34 (m, 2H), 7.03 (t,  $J = 8.4$  Hz, 2H), 6.87 (d,  $J = 15.6$  Hz, 1H), 5.95 (d,  $J = 15.6$  Hz, 1H), 4.62 (s, 1H), 3.28 (s, 3H), 3.22 (s, 3H).

**$^{13}\text{C NMR}$**  (100 MHz,  $\text{CDCl}_3$ )  $\delta$  182.1, 173.0, 134.8, 130.9 (d,  $J_{\text{C-F}} = 3.0$  Hz), 129.0 (d,  $J_{\text{C-F}} = 9.2$  Hz), 120.8 (d,  $J_{\text{C-F}} = 3.0$  Hz), 116.0 (d,  $J_{\text{C-F}} = 31.5$  Hz), 87.0, 29.4, 28.4.

**HRMS** (ESI): exact mass calcd for  $\text{C}_{13}\text{H}_{13}\text{FN}_2\text{O}_2\text{SNa}$  ( $\text{M}+\text{Na}$ )<sup>+</sup> requires  $m/z$  303.0574, found  $m/z$  303.0580.

**(*R, E*)-5-(4-chlorostyryl)-5-hydroxy-1,3-dimethyl-2-thioxoimidazolidin-4-one (3g)**

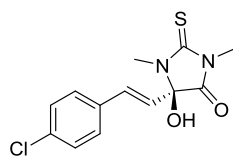

White solid, m.p. = 110.2-112.1 °C. 20.8 mg, 71% yield, 97% ee. HPLC CHIRALCEL AD-H, n-hexane/2-propanol = 95/5, flow rate = 0.6 mL/min,  $\lambda = 254$  nm, retention time: 43.483min (minor), 57.492 min (major).  $[\alpha]_{\text{D}}^{23} = 42.5$  ( $c = 0.60$ ,  $\text{CH}_2\text{Cl}_2$ ).

**TLC:**  $R_f = 0.58$  (petroleum ether/ethyl acetate = 5:1) [UV].

**$^1\text{H NMR}$**  (600 MHz,  $\text{CDCl}_3$ )  $\delta$  7.34 – 7.30 (m, 4H), 6.89 (d,  $J = 15.6$ , 1H), 6.01 (d,  $J = 15.6$ , 1H), 3.75 (s, 1H), 3.30 (s, 3H), 3.23 (s, 3H).

**$^{13}\text{C NMR}$**  (150 MHz,  $\text{CDCl}_3$ )  $\delta$  182.2, 172.2, 135.1, 134.7, 133.1, 129.1, 128.4, 121.6, 86.6, 29.3, 28.3.

**HRMS** (ESI): exact mass calcd for  $\text{C}_{13}\text{H}_{14}\text{ClN}_2\text{O}_2\text{S}$  ( $\text{M}+\text{H}$ )<sup>+</sup> requires  $m/z$  297.0459, found  $m/z$  297.0460.

**(R, E)-5-(4-bromostyryl)-5-hydroxy-1,3-dimethyl-2-thioxoimidazolidin-4-one (3h)**

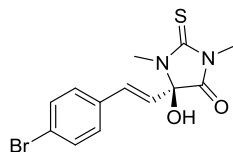

White solid, m.p. = 83.7-85.6 °C. 25.4 mg, 75% yield, 93% ee. HPLC CHIRALCEL AD-H, n-hexane/2-propanol = 90/10, flow rate = 0.6 mL/min,  $\lambda$  = 254 nm, retention time: 24.392min (minor), 32.170 min (major).  $[\alpha]_D^{23} = 77.7$  (c = 0.31, CH<sub>2</sub>Cl<sub>2</sub>).

**TLC:** R<sub>f</sub> = 0.50 (petroleum ether/ethyl acetate = 5:1) [UV].

**<sup>1</sup>H NMR** (400 MHz, CDCl<sub>3</sub>)  $\delta$  7.51 – 7.45 (m, 2H), 7.28 – 7.23 (m, 3H), 6.87 (d, *J* = 16.0 Hz, 1H), 6.02 (d, *J* = 16.0 Hz, 1H), 3.88 (s, 1H), 3.30 (s, 3H), 3.23 (s, 3H).

**<sup>13</sup>C NMR** (100 MHz, CDCl<sub>3</sub>)  $\delta$  182.3, 172.4, 134.9, 133.6, 132.2, 128.8, 123.5, 121.9, 86.8, 29.4, 28.5.

**HRMS** (ESI): exact mass calcd for C<sub>13</sub>H<sub>13</sub>BrN<sub>2</sub>O<sub>2</sub>SNa (M+Na)<sup>+</sup> requires m/z 362.9773, found m/z 362.9779

**(R, E)-5-(2-([1,1'-biphenyl]-4-yl)vinyl)-5-hydroxy-1,3-dimethyl-2-thioxoimidazolidin-4-one (3i)**

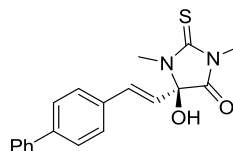

White solid, m.p. = 132.8-134.2 °C. 18.5 mg, 55% yield, 93% ee. HPLC CHIRALCEL OD-H, n-hexane/2-propanol = 80/20, flow rate = 0.6 mL/min,  $\lambda$  = 254 nm, retention time: 13.857min (major), 18.140 min (minor).  $[\alpha]_D^{23} = 17.8$  (c = 0.24, CH<sub>2</sub>Cl<sub>2</sub>).

**TLC:** R<sub>f</sub> = 0.48 (petroleum ether/ethyl acetate = 5:1) [UV].

**<sup>1</sup>H NMR** (600 MHz, CDCl<sub>3</sub>)  $\delta$  7.59 – 7.57 (m, 4H), 7.47 – 7.42 (m, 4H), 7.37 – 7.34 (m, 1H), 6.96 (d, *J* = 16.2 Hz, 1H), 6.08 (d, *J* = 16.2 Hz, 1H), 4.24 (s, 1H), 3.32 (s, 3H), 3.25 (s, 3H).

**<sup>13</sup>C NMR** (150 MHz, CDCl<sub>3</sub>)  $\delta$  142.1, 140.3, 135.5, 129.0, 127.8, 127.8, 127.6, 127.1, 121.1, 86.9, 29.4, 28.4.

**HRMS** (ESI): exact mass calcd for C<sub>19</sub>H<sub>19</sub>N<sub>2</sub>O<sub>2</sub>S (M+H)<sup>+</sup> requires m/z 339.1162, found m/z 339.1165

**(R, E)-5-hydroxy-1,3-dimethyl-5-(4-nitrostyryl)-2-thioxoimidazolidin-4-one (3j)**

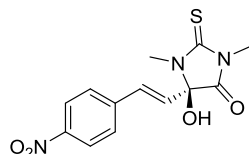

White solid, m.p. = 201.1-203.5 °C. 16.2 mg, 53% yield, 90% ee. HPLC CHIRALCEL IE, n-hexane/2-propanol = 90/10, flow rate = 0.6 mL/min,  $\lambda$  = 254 nm, retention time: 30.735 min (minor), 33.487 min (major).  $[\alpha]_D^{23} = 11.3$  (c = 0.15, CH<sub>2</sub>Cl<sub>2</sub>).

**TLC:** R<sub>f</sub> = 0.45 (petroleum ether/ethyl acetate = 5:1) [UV].

**<sup>1</sup>H NMR** (600 MHz, CD<sub>3</sub>OD)  $\delta$  8.23 (d, *J* = 8.8 Hz, 2H), 7.74 (d, *J* = 8.8 Hz, 2H), 7.11 (d, *J* = 16.0 Hz,

1H), 6.41 (d,  $J = 16.0$  Hz, 1H), 3.29 (s, 3H), 3.21 (s, 3H).

$^{13}\text{C}$  NMR (150 MHz,  $\text{CD}_3\text{OD}$ )  $\delta$  183.6, 173.9, 149.2, 143.3, 134.4, 129.2, 128.5, 125.1, 88.1, 29.4, 28.5.

HRMS (ESI): exact mass calcd for  $\text{C}_{13}\text{H}_{13}\text{N}_3\text{O}_4\text{SNa}$  ( $\text{M}+\text{Na}$ ) $^+$  requires  $m/z$  330.0519, found  $m/z$  330.0529.

**(*R, E*)-5-hydroxy-5-(4-methoxystyryl)-1,3-dimethyl-2-thioxoimidazolidin-4-one (3k)**

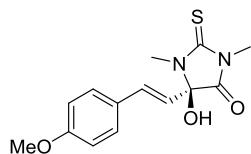

Colorless oil, 14.3 mg, 49% yield, 96% ee. HPLC CHIRALCEL IE, n-hexane/2-propanol = 90/10, flow rate = 0.6 mL/min,  $\lambda = 254$  nm, retention time: 18.665 min (major), 20.170 min (minor).  $[\alpha]_{\text{D}}^{23} = 6.4$  ( $c = 0.17$ ,  $\text{CH}_2\text{Cl}_2$ ).

TLC:  $R_f = 0.55$  (petroleum ether/ethyl acetate = 5:1) [UV].

$^1\text{H}$  NMR (150 MHz,  $\text{CDCl}_3$ )  $\delta$  7.33 – 7.32 (m, 2H), 6.86 – 6.85 (m, 2H), 6.83 (d,  $J = 16.2$  Hz, 1H), 5.90 (d,  $J = 15.6$  Hz, 1H), 4.21 (s, 1H), 3.82 (s, 3H), 3.28 (s, 3H), 3.23 (s, 3H).

$^{13}\text{C}$  NMR (150 MHz,  $\text{CDCl}_3$ )  $\delta$  182.1, 172.8, 160.4, 135.2, 128.6, 127.3, 118.5, 114.2, 87.0, 55.3, 29.3, 28.3.

HRMS (ESI): exact mass calcd for  $\text{C}_{14}\text{H}_{16}\text{N}_2\text{O}_3\text{SNa}$  ( $\text{M}+\text{Na}$ ) $^+$  requires  $m/z$  315.0774, found  $m/z$  315.0775.

**(*R, E*)-5-hydroxy-1,3-dimethyl-5-(4-methylstyryl)-2-thioxoimidazolidin-4-one (3l)**

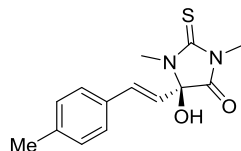

White solid, m.p. = 102.8-104.2 °C. 19.0 mg, 69% yield, 94% ee. HPLC CHIRALCEL OD-H, n-hexane/2-propanol = 95/5, flow rate = 0.6 mL/min,  $\lambda = 254$  nm, retention time: 19.045 min (major), 21.570 min (minor).  $[\alpha]_{\text{D}}^{23} = 54.6$  ( $c = 0.41$ ,  $\text{CH}_2\text{Cl}_2$ ).

TLC:  $R_f = 0.55$  (petroleum ether/ethyl acetate = 5:1) [UV].

$^1\text{H}$  NMR (600 MHz,  $\text{CDCl}_3$ )  $\delta$  7.28 (d,  $J = 8.4$  Hz, 2H), 7.14 (d,  $J = 7.8$  Hz, 2H), 6.85 (d,  $J = 16.2$  Hz, 1H), 5.98 (d,  $J = 15.6$  Hz, 1H), 4.54 (s, 1H), 3.27 (s, 3H), 3.21 (s, 3H), 2.35 (s, 3H).

$^{13}\text{C}$  NMR (150 MHz,  $\text{CDCl}_3$ )  $\delta$  182.0, 173.0, 139.3, 135.7, 131.9, 129.5, 127.2, 119.9, 87.1, 29.3, 28.3, 21.3.

HRMS (ESI): exact mass calcd for  $\text{C}_{14}\text{H}_{16}\text{N}_2\text{O}_2\text{SNa}$  ( $\text{M}+\text{Na}$ ) $^+$  requires  $m/z$  299.0825, found  $m/z$  299.0830.

**(*R, E*)-5-hydroxy-1,3-dimethyl-5-(3-methylstyryl)-2-thioxoimidazolidin-4-one (3m)**

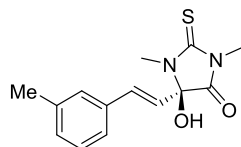

White solid, m.p. = 109.8-112.7 °C. 22.3 mg, 81% yield, 96% ee. HPLC CHIRALCEL OD-H, n-hexane/2-propanol = 95/5, flow rate = 0.5 mL/min,  $\lambda$  = 254 nm, retention time: 24.598 min (minor), 27.423 min (major).  $[\alpha]_D^{23}$  = 46.5 (c = 0.54, CH<sub>2</sub>Cl<sub>2</sub>).

**TLC:** R<sub>f</sub> = 0.60 (petroleum ether/ethyl acetate = 5:1) [UV].

**<sup>1</sup>H NMR** (600 MHz, CDCl<sub>3</sub>)  $\delta$  7.24 – 7.18 (m, 3H), 7.13 (d, *J* = 7.2 Hz, 1H), 6.86 (d, *J* = 16.2 Hz, 1H), 6.02 (d, *J* = 15.6 Hz, 1H), 4.71 (s, 1H), 3.27 (s, 3H), 3.22 (s, 3H), 2.34 (s, 3H).

**<sup>13</sup>C NMR** (150 MHz, CDCl<sub>3</sub>)  $\delta$  182.1, 173.2, 138.5, 136.0, 134.7, 130.1, 128.8, 127.9, 124.5, 120.9, 87.2, 29.4, 28.4, 21.4.

**HRMS** (ESI): exact mass calcd for C<sub>14</sub>H<sub>16</sub>N<sub>2</sub>O<sub>2</sub>SNa (M+Na)<sup>+</sup> requires m/z 299.0825, found m/z 299.0834.

**(R, E)-5-hydroxy-5-(3-methoxystyryl)-1,3-dimethyl-2-thioxoimidazolidin-4-one (3n)**

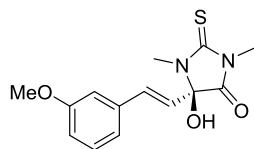

White solid, m.p. = 103.5-104.7 °C. 19.5 mg, 67% yield, 92% ee. HPLC CHIRALCEL OD-H, n-hexane/2-propanol = 80/20, flow rate = 0.6 mL/min,  $\lambda$  = 254 nm, retention time: 11.355 min (major), 15.088 min (minor).  $[\alpha]_D^{23}$  = 32.6 (c = 0.25, CH<sub>2</sub>Cl<sub>2</sub>).

**TLC:** R<sub>f</sub> = 0.55 (petroleum ether/ethyl acetate = 5:1) [UV].

**<sup>1</sup>H NMR** (600 MHz, CDCl<sub>3</sub>)  $\delta$  7.24 (t, *J* = 8.4 Hz, 1H), 6.97 (d, *J* = 8.4 Hz, 1H), 6.92 (t, *J* = 1.8 Hz, 1H), 6.87 – 6.85 (m, 2H), 6.02 (d, *J* = 15.6 Hz, 1H), 4.58 (s, 1H), 3.80 (s, 3H), 3.27 (s, 3H), 3.22 (s, 3H).

**<sup>13</sup>C NMR** (150 MHz, CDCl<sub>3</sub>)  $\delta$  182.0, 172.9, 159.8, 135.9, 135.7, 129.8, 121.3, 119.8, 115.0, 112.2, 86.9, 55.3, 29.3, 28.3.

**HRMS** (ESI): exact mass calcd for C<sub>14</sub>H<sub>16</sub>N<sub>2</sub>O<sub>3</sub>SNa (M+Na)<sup>+</sup> requires m/z 315.0774, found m/z 315.0778.

**(R, E)-5-(3-fluorostyryl)-5-hydroxy-1,3-dimethyl-2-thioxoimidazolidin-4-one (3o)**

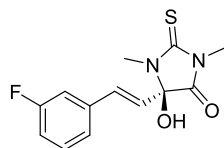

White solid, m.p. = 116.7-117.3 °C. 20.1 mg, 72% yield, 93% ee. HPLC CHIRALCEL OD-H, n-hexane/2-propanol = 95/5, flow rate = 0.5 mL/min,  $\lambda$  = 254 nm, retention time: 26.955 min (major), 28.860 min (minor).  $[\alpha]_D^{23}$  = 15.7 (c = 0.15, CH<sub>2</sub>Cl<sub>2</sub>).

**TLC:** R<sub>f</sub> = 0.55 (petroleum ether/ethyl acetate = 5:1) [UV].

**<sup>1</sup>H NMR** (600 MHz, CDCl<sub>3</sub>) δ 7.32 – 7.26 (m, 1H), 7.16 (d, *J* = 7.8 Hz, 1H), 7.10 (d, *J* = 9.6 Hz, 1H), 7.01 (td, *J* = 8.4, 2.4 Hz, 1H), 6.90 (d, *J* = 16.2 Hz, 1H), 6.04 (d, *J* = 15.9 Hz, 1H), 4.35 (s, 1H), 3.29 (s, 3H), 3.22 (s, 3H).

**<sup>13</sup>C NMR** (150 MHz, CDCl<sub>3</sub>) δ 182.2, 172.7, 163.9, 162.3, 137.0 (d, *J*<sub>C-F</sub> = 7.5 Hz), 134.9 (d, *J*<sub>C-F</sub> = 3.0 Hz), 130.5 (d, *J*<sub>C-F</sub> = 7.5 Hz), 123.2 (d, *J*<sub>C-F</sub> = 3.0 Hz), 122.5, 116.1 (d, *J*<sub>C-F</sub> = 21.1 Hz), 113.8 (d, *J*<sub>C-F</sub> = 22.0 Hz), 86.8, 29.4, 28.4.

182.23 , 172.70 , 137.01 , 136.96 , 134.96 , 134.94 , 130.50 , 130.45 , 123.29 , 123.27 , 122.59 , 116.28 , 116.13 , 113.85 , 113.70 , 86.82 , 29.42 , 28.47 .

**HRMS** (ESI): exact mass calcd for C<sub>13</sub>H<sub>13</sub>FN<sub>2</sub>O<sub>2</sub>SNa (M+Na)<sup>+</sup> requires *m/z* 303.0574, found *m/z* 303.0579.

**(*R, E*)-5-(3-bromostyryl)-5-hydroxy-1,3-dimethyl-2-thioxoimidazolidin-4-one (3p)**

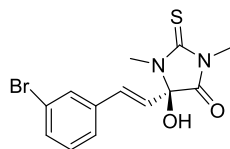

White solid, m.p. = 122.1-123.9 °C. 25.1 mg, 74% yield, 72% ee. HPLC CHIRALCEL AD-H, n-hexane/2-propanol = 95/5, flow rate = 0.6 mL/min, λ = 254 nm, retention time: 21.545 min (minor), 25.020 min (major). [α]<sub>D</sub><sup>23</sup> = -7.6 (c = 0.20, CH<sub>2</sub>Cl<sub>2</sub>).

**TLC:** R<sub>f</sub> = 0.50 (petroleum ether/ethyl acetate = 5:1) [UV].

**<sup>1</sup>H NMR** (600 MHz, CDCl<sub>3</sub>) δ 7.56 (s, 1H), 7.44 (d, *J* = 7.8 Hz, 1H), 7.31 (d, *J* = 7.2 Hz, 1H), 7.21 (t, *J* = 7.8 Hz, 1H), 6.87 (d, *J* = 16.2 Hz, 1H), 6.04 (d, *J* = 15.6 Hz, 1H), 4.03 (s, 1H), 3.30 (s, 3H), 3.23 (s, 3H).

**<sup>13</sup>C NMR** (150 MHz, CDCl<sub>3</sub>) δ 182.1, 172.4, 136.7, 134.5, 132.0, 130.3, 129.9, 125.9, 122.9, 122.6, 86.6, 29.3, 28.3.

**HRMS** (ESI): exact mass calcd for C<sub>13</sub>H<sub>13</sub>BrN<sub>2</sub>O<sub>2</sub>SNa (M+Na)<sup>+</sup> requires *m/z* 362.9773, found *m/z* 362.9780.

**(*R, E*)-5-(3,4-dichlorostyryl)-5-hydroxy-1,3-dimethyl-2-thioxoimidazolidin-4-one (3q)**

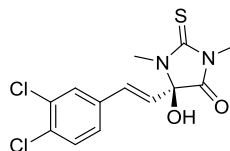

White solid, m.p. = 137.8-138.8 °C. 26.9 mg, 82% yield, 97% ee. HPLC CHIRALCEL OD-H, n-hexane/2-propanol = 95/5, flow rate = 0.6 mL/min, λ = 254 nm, retention time: 24.438 min (minor), 28.122 min (major). [α]<sub>D</sub><sup>23</sup> = 9.6 (c = 0.10, CH<sub>2</sub>Cl<sub>2</sub>).

**TLC:** R<sub>f</sub> = 0.55 (petroleum ether/ethyl acetate = 5:1) [UV].

**<sup>1</sup>H NMR** (400 MHz, CDCl<sub>3</sub>) δ 7.48 (d, *J* = 2.0 Hz, 1H), 7.41 (d, *J* = 8.4 Hz, 1H), 7.21 (dd, *J* = 8.4, 2.0 Hz, 1H), 6.85 (d, *J* = 15.6 Hz, 1H), 6.02 (d, *J* = 15.6 Hz, 1H), 4.30 (s, 1H), 3.29 (s, 3H), 3.21 (s, 3H).

**<sup>13</sup>C NMR** (100 MHz, CDCl<sub>3</sub>) δ 182.2, 172.6, 134.8, 133.8, 133.2, 130.9, 128.9, 126.4, 123.2, 86.7,



29.4, 28.5.

**HRMS** (ESI): exact mass calcd for  $C_{13}H_{12}Cl_2N_2O_2SNa$  ( $M+Na$ )<sup>+</sup> requires  $m/z$  352.9889, found  $m/z$  352.9897

**(*R, E*)-5-(3,5-bis(trifluoromethyl)styryl)-5-hydroxy-1,3-dimethyl-2-thioxoimidazolidin-4-one (3r)**

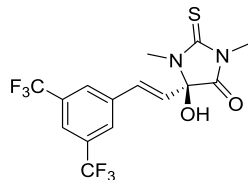

White solid, m.p. = 139.5-141.3 °C. 22.8 mg, 57% yield, 92% ee. HPLC CHIRALCEL OJ, n-hexane/2-propanol = 90/10, flow rate = 0.5 mL/min,  $\lambda$  = 254 nm, retention time: 12.368 min (minor), 16.435 min (major).  $[\alpha]_D^{23}$  = 18.0 (c = 0.40,  $CH_2Cl_2$ ).

**TLC:**  $R_f$  = 0.50 (petroleum ether/ethyl acetate = 5:1) [UV].

**<sup>1</sup>H NMR** (600 MHz,  $CDCl_3$ )  $\delta$  7.90 – 7.75 (m, 3H), 7.05 (d,  $J$  = 16.2 Hz, 1H), 6.20 (d,  $J$  = 16.2 Hz, 1H), 4.26 (s, 1H), 3.31 (s, 3H), 3.24 (s, 3H).

**<sup>13</sup>C NMR** (150 MHz,  $CDCl_3$ )  $\delta$  182.0, 172.2, 136.7, 133.3, 132.3 (q,  $J_{C-F}$  = 33.0 Hz), 132.2, 127.0 (d,  $J_{C-F}$  = 3.0 Hz), 127.0, 123.9 (q,  $J_{C-F}$  = 271.5 Hz), 122.5 (d,  $J_{C-F}$  = 3.0 Hz), 122.1, 86.5, 29.3, 28.4.

**HRMS** (ESI): exact mass calcd for  $C_{15}H_{12}F_6N_2O_2SNa$  ( $M+Na$ )<sup>+</sup> requires  $m/z$  421.0416, found  $m/z$  421.0420.

**(*R, E*)-5-hydroxy-1,3-dimethyl-5-(2-(thiophen-2-yl)vinyl)-2-thioxoimidazolidin-4-one (3s)**

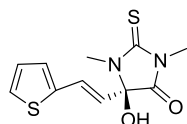

Colorless oil, 14.7 mg, 55% yield, 96% ee. HPLC CHIRALCEL OD-H, n-hexane/2-propanol = 98/2, flow rate = 0.5 mL/min,  $\lambda$  = 254 nm, retention time: 72.015 min (major), 81.788 min (minor).  $[\alpha]_D^{23}$  = 6.4 (c = 0.20,  $CH_2Cl_2$ ).

**TLC:**  $R_f$  = 0.60 (petroleum ether/ethyl acetate = 5:1) [UV].

**<sup>1</sup>H NMR** (600 MHz,  $CDCl_3$ )  $\delta$  7.28 – 7.25 (m, 1H), 7.11 – 7.08 (m, 1H), 7.06 (d,  $J$  = 15.6 Hz, 1H), 7.02 – 6.96 (m, 1H), 5.84 (d,  $J$  = 15.6 Hz, 1H), 4.04 (s, 1H), 3.29 (s, 3H), 3.23 (s, 3H).

**<sup>13</sup>C NMR** (150 MHz,  $CDCl_3$ )  $\delta$  182.0, 172.5, 139.5, 129.0, 128.6, 127.7, 126.5, 119.8, 86.6, 29.3, 28.3.

**HRMS** (ESI): exact mass calcd for  $C_{11}H_{12}N_2O_2S_2Na$  ( $M+Na$ )<sup>+</sup> requires  $m/z$  291.0232, found  $m/z$  291.0235.

**(*R, E*)-5-hydroxy-1,3-dimethyl-5-(2-(naphthalen-2-yl)vinyl)-2-thioxoimidazolidin-4-one (3t)**

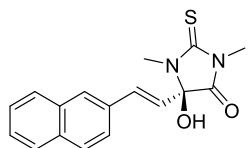

White solid, m.p. = 112.8-113.2 °C. 18.1 mg, 58% yield, 83% ee. HPLC CHIRALCEL OD-H,

n-hexane/2-propanol = 95/5, flow rate = 0.6 mL/min,  $\lambda$  = 254 nm, retention time: 29.727 min (major), 38.342 min (minor).  $[\alpha]_{\text{D}}^{23}$  = 36.2 (c = 0.22, CH<sub>2</sub>Cl<sub>2</sub>).

**TLC:**  $R_f$  = 0.50 (petroleum ether/ethyl acetate = 5:1) [UV].

**<sup>1</sup>H NMR** (600 MHz, CDCl<sub>3</sub>)  $\delta$  7.82 – 7.75 (m, 4H), 7.55 (dd,  $J$  = 9.0, 1.8 Hz, 1H), 7.51 – 7.44 (m, 2H), 7.08 (d,  $J$  = 16.2 Hz, 1H), 6.16 (d,  $J$  = 16.2 Hz, 1H), 4.32 (s, 1H), 3.32 (s, 3H), 3.27 (s, 3H).

**<sup>13</sup>C NMR** (150 MHz, CDCl<sub>3</sub>)  $\delta$  182.2, 172.8, 136.0, 132.1, 128.7, 128.4, 128.3, 127.8, 126.8, 126.7, 123.4, 121.3, 87.0, 29.4, 28.4.

**HRMS** (ESI): exact mass calcd for C<sub>17</sub>H<sub>16</sub>N<sub>2</sub>O<sub>2</sub>SNa (M+Na)<sup>+</sup> requires m/z 335.0825, found m/z 335.0830.

**(4R, 5R)-4,5-dihydroxy-1,3,4-trimethyl-5-((E)-styryl)imidazolidine-2-thione (4a)**

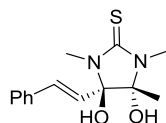

White solid, m.p. = 101.8-103.2 °C. 26.5 mg, 95% yield, 99% ee. HPLC CHIRALCEL IA, n-hexane/2-propanol = 80/20, flow rate = 0.6 mL/min,  $\lambda$  = 254 nm, retention time: 8.773 min (major), 10.695 min (minor).  $[\alpha]_{\text{D}}^{23}$  = 20.1 (c = 0.16, CH<sub>2</sub>Cl<sub>2</sub>).

**TLC:**  $R_f$  = 0.40 (petroleum ether/ethyl acetate = 3:1) [UV].

**<sup>1</sup>H NMR** (400 MHz, DMSO-*d*<sub>6</sub>)  $\delta$  7.52 – 7.46 (m, 2H), 7.37 (t,  $J$  = 7.2 Hz, 2H), 7.32 – 7.25 (m, 1H), 6.89 (d,  $J$  = 16.0 Hz, 1H), 6.43 – 6.35 (m, 2H), 6.14 (s, 1H), 3.03 (s, 3H), 2.92 (s, 3H), 1.37 (s, 3H).

**<sup>13</sup>C NMR** (100 MHz, DMSO-*d*<sub>6</sub>)  $\delta$  191.4, 145.7, 142.0, 138.3, 137.5, 136.3, 136.1, 101.6, 101.5, 38.7, 38.0, 28.7.

**HRMS** (ESI): exact mass calcd for C<sub>14</sub>H<sub>19</sub>N<sub>2</sub>O<sub>2</sub>S (M+H)<sup>+</sup> requires m/z 279.1162, found m/z 279.1169.

**(4R, 5R)-4,5-dihydroxy-1,3-dimethyl-4-((E)-styryl)imidazolidine-2-thione (5a)**

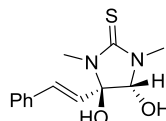

White solid, m.p. = 98.8-101.2 °C. 25.8 mg, 98% yield, 91% ee. HPLC CHIRALCEL IA, n-hexane/2-propanol = 80/20, flow rate = 0.6 mL/min,  $\lambda$  = 254 nm, retention time: 8.865 min (minor), 9.093 min (major).  $[\alpha]_{\text{D}}^{23}$  = 50.0 (c = 0.1, CH<sub>2</sub>Cl<sub>2</sub>).

**TLC:**  $R_f$  = 0.20 (petroleum ether/ethyl acetate = 3:1) [UV].

**<sup>1</sup>H NMR** (400 MHz, DMSO-*d*<sub>6</sub>)  $\delta$  7.52 – 7.46 (m, 2H), 7.40 – 7.34 (m, 2H), 7.32 – 7.28 (m, 1H), 6.86 (d,  $J$  = 16.0 Hz, 1H), 6.69 (s, 1H), 6.59 (d,  $J$  = 7.2 Hz, 1H), 6.27 (d,  $J$  = 16.0 Hz, 1H), 4.80 (d,  $J$  = 7.2 Hz, 1H), 3.06 (s, 3H), 2.88 (s, 3H).

**<sup>13</sup>C NMR** (100 MHz, DMSO-*d*<sub>6</sub>)  $\delta$  181.8, 136.4, 132.8, 129.2, 128.5, 127.2, 126.5, 90.9, 90.8, 31.6, 29.2.

**HRMS** (ESI): exact mass calcd for C<sub>13</sub>H<sub>16</sub>N<sub>2</sub>O<sub>2</sub>SNa (M+Na)<sup>+</sup> requires m/z 287.0825, found m/z 287.0816.

**(4*R*, 5*R*)-4-((*E*)-4-chlorostyryl)-4,5-dihydroxy-1,3-dimethylimidazolidine-2-thione (6a)**

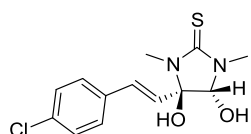

White solid, m.p. = 91.8-93.2 °C. 28.4 mg, 97% yield, 97% ee. HPLC CHIRALCEL IA, n-hexane/2-propanol = 80/20, flow rate = 0.6 mL/min,  $\lambda$  = 254 nm, retention time: 10.488 min (minor), 17.005 min (major).  $[\alpha]_D^{23}$  = 42.2 (c = 0.26, CH<sub>2</sub>Cl<sub>2</sub>).

**TLC:** R<sub>f</sub> = 0.40 (petroleum ether/ethyl acetate = 3:1) [UV].

**<sup>1</sup>H NMR** (600 MHz, DMSO-*d*<sub>6</sub>)  $\delta$  7.53 (d, *J* = 8.4 Hz, 2H), 7.42 (d, *J* = 8.4 Hz, 2H), 6.85 (d, *J* = 16.2 Hz, 1H), 6.72 (s, 1H), 6.61 (d, *J* = 7.2 Hz, 1H), 6.29 (d, *J* = 16.2 Hz, 1H), 4.80 (d, *J* = 7.8 Hz, 1H), 3.06 (s, 3H), 2.87 (s, 3H).

**<sup>13</sup>C NMR** (100 MHz, DMSO-*d*<sub>6</sub>)  $\delta$  138.3, 138.1, 136.7, 100.0, 99.9, 49.7, 49.5, 49.3, 49.1, 48.9, 48.7, 48.5, 38.4.

**HRMS** (ESI): exact mass calcd for C<sub>13</sub>H<sub>16</sub>N<sub>2</sub>O<sub>2</sub>S (M+H)<sup>+</sup> requires m/z 299.0616, found m/z 299.0609.

**(4*R*, 5*R*)-4-((*E*)-4-chlorostyryl)-4,5-dihydroxy-1,3-dimethyl-5-vinylimidazolidine-2-thione (7a)**

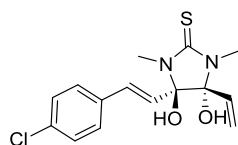

White solid, m.p. = 85.3-88.9 °C. 30.2 mg, 93% yield, 96% ee. HPLC CHIRALCEL IA, n-hexane/2-propanol = 80/20, flow rate = 0.6 mL/min,  $\lambda$  = 254 nm, retention time: 8.368 min (minor), 38.342 min (major).  $[\alpha]_D^{23}$  = 17.5 (c = 0.20, CH<sub>2</sub>Cl<sub>2</sub>).

**TLC:** R<sub>f</sub> = 0.40 (petroleum ether/ethyl acetate = 3:1) [UV].

**<sup>1</sup>H NMR** (400 MHz, DMSO-*d*<sub>6</sub>)  $\delta$  7.49 (d, *J* = 8.8 Hz, 2H), 7.42 (d, *J* = 8.8 Hz, 2H), 6.77 (d, *J* = 16.0 Hz, 1H), 6.56 (s, 1H), 6.45 – 6.32 (m, 2H), 5.99 (dd, *J* = 17.2 Hz, 10.8 Hz, 1H), 5.45 (ddd, *J* = 30.0 Hz, 17.2 Hz, 2.0 Hz, 1H), 2.93 (s, 3H), 2.90 (s, 3H).

**<sup>13</sup>C NMR** (100 MHz, DMSO-*d*<sub>6</sub>)  $\delta$  182.6, 135.4, 134.9, 132.8, 132.1, 129.2, 128.9, 127.4, 119.8, 93.1, 93.0, 29.8, 29.7.

**HRMS** (ESI): exact mass calcd for C<sub>15</sub>H<sub>18</sub>N<sub>2</sub>O<sub>2</sub>S (M+H)<sup>+</sup> requires m/z 325.0772, found m/z 325.0780.

## 8. Reference

- (1) X.-C. Yang, M.-M. Liu, F. Mathey, H. Yang, Y.-Z. Hua and M.-C. Wang, Access to chiral 2,5-pyrrolidinyl dispirooxindoles via dinuclear Zinc-catalyzed asymmetric cascade reactions. *J. Org. Chem.* 2019, **84**, 7762–7775.
- (2) R. Saito, N. Uemura, H. Ishikawa, A. Magara, Y. Yoshida, T. Mino, Y. Kasashima and M. Sakamoto, Umpolung cyclization reaction of *N*-cinnamoylthioureas in the presence of DBU. *Org. Biomol. Chem.*, 2018, **16**, 7910–7919.
- (3) H.-F. Tu, C. Zheng, R.-Q. Xu, X.-J. Liu and S.-L. You, Iridium-Catalyzed Intermolecular Asymmetric Dearomatization of  $\beta$ -Naphthols with Allyl Alcohols or Allyl Ethers. *Angew. Chem., Int. Ed.*, 2017, **56**, 3237-3241.
- (4) L. Dai, X. Li, Z. Zeng, S. Dong, Y. Zhou, X. Liu and X. Feng, Catalytic Asymmetric Acyloin Rearrangements of  $\alpha$ -Ketols,  $\alpha$ -Hydroxy Aldehydes, and  $\alpha$ -Iminols by *N,N'*-Dioxide–Metal Complexes. *Org. Lett.*, 2020, **22**, 5041–5045.

## 9. Copies of NMR spectra for the adducts

### <sup>1</sup>H NMR for 1aa

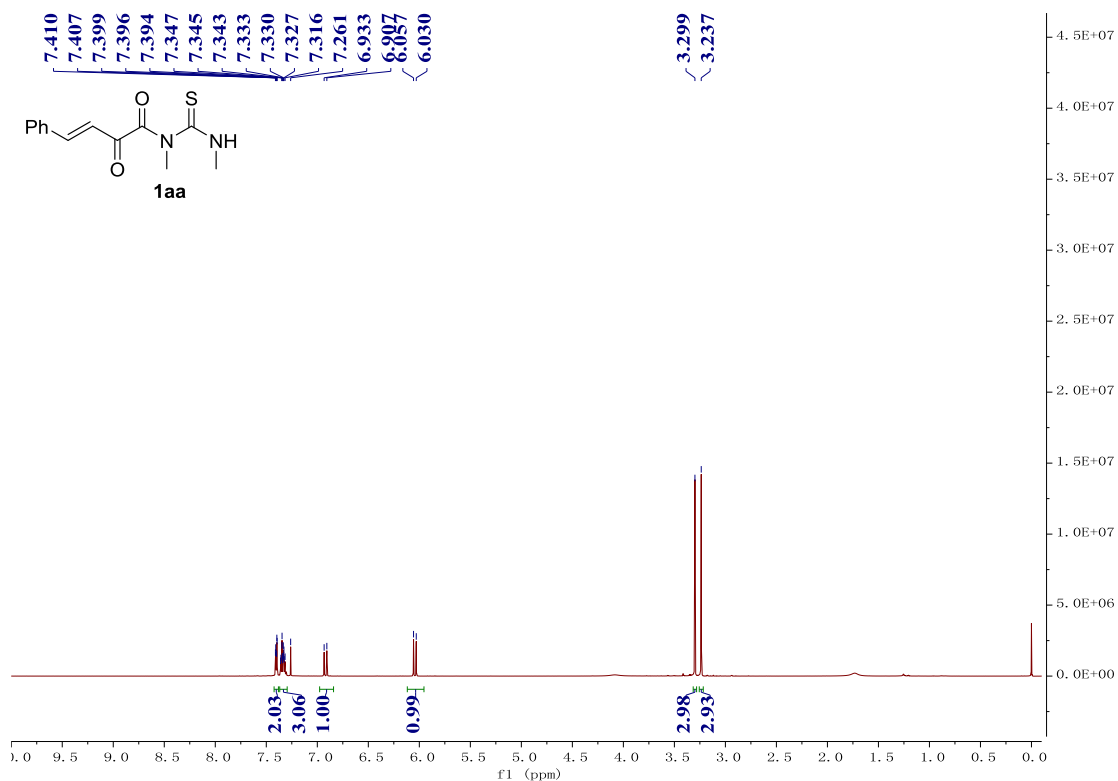

### <sup>13</sup>C NMR for 1aa

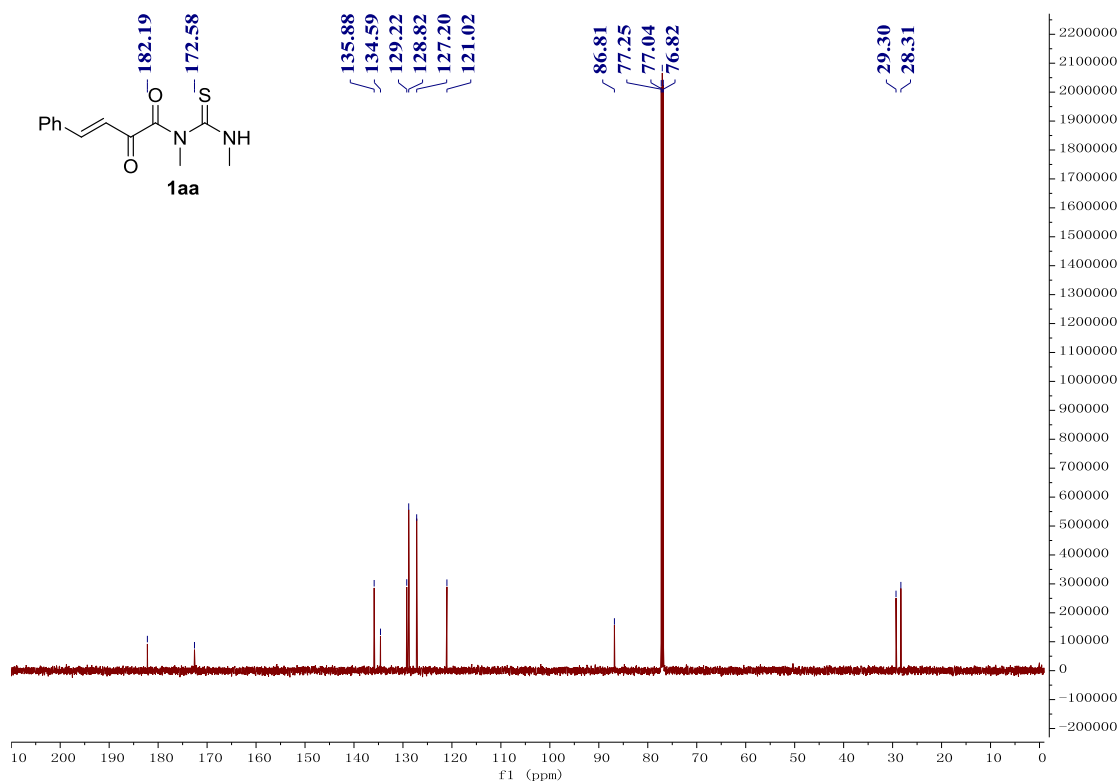

### <sup>1</sup>H NMR for 1ab

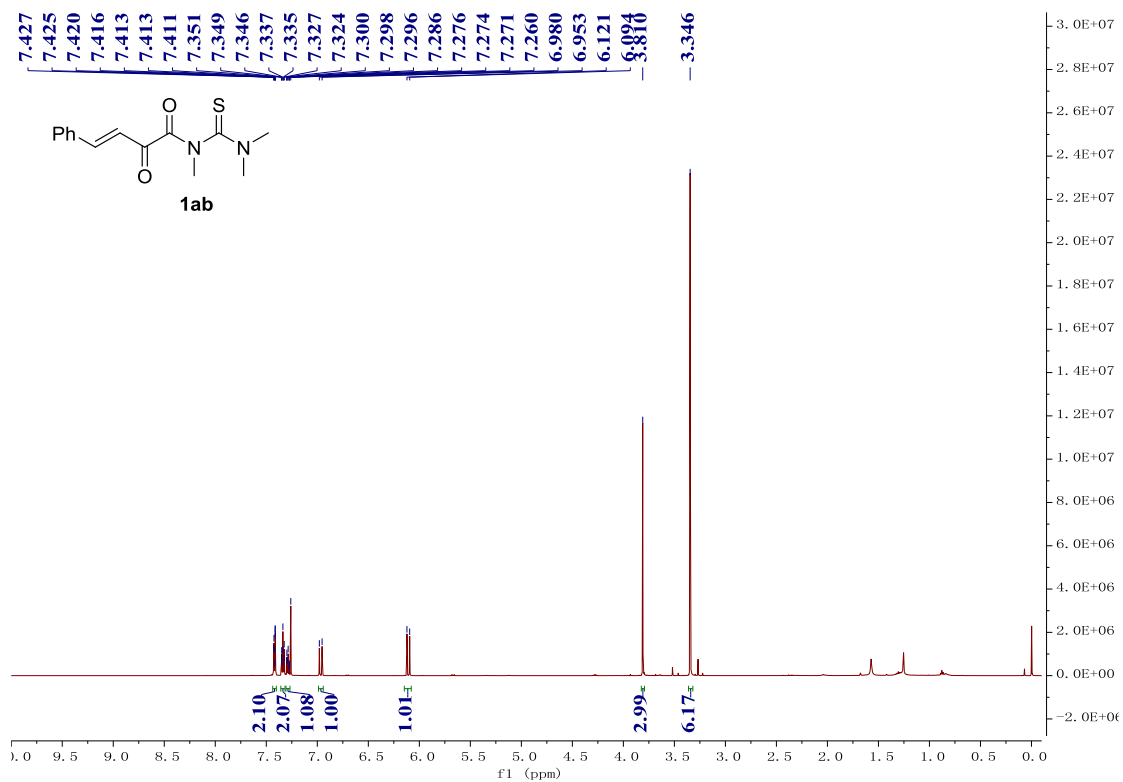

### <sup>13</sup>C NMR for 1ab

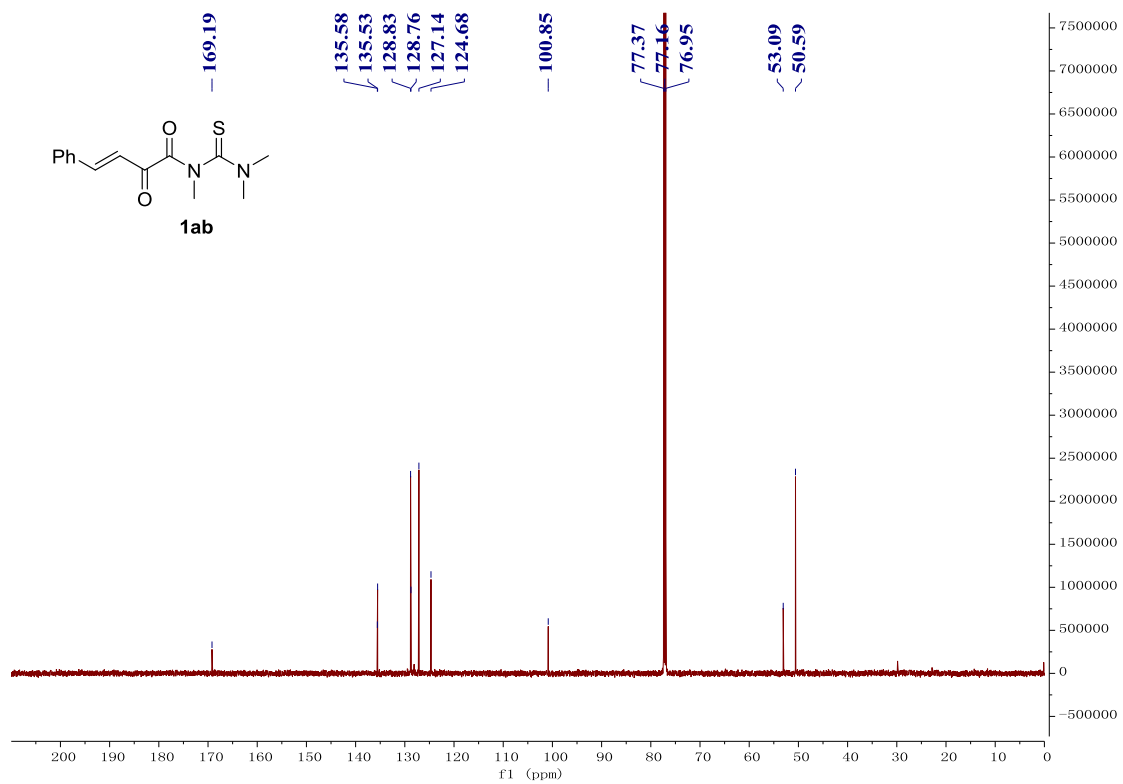

### <sup>1</sup>H NMR for 3a

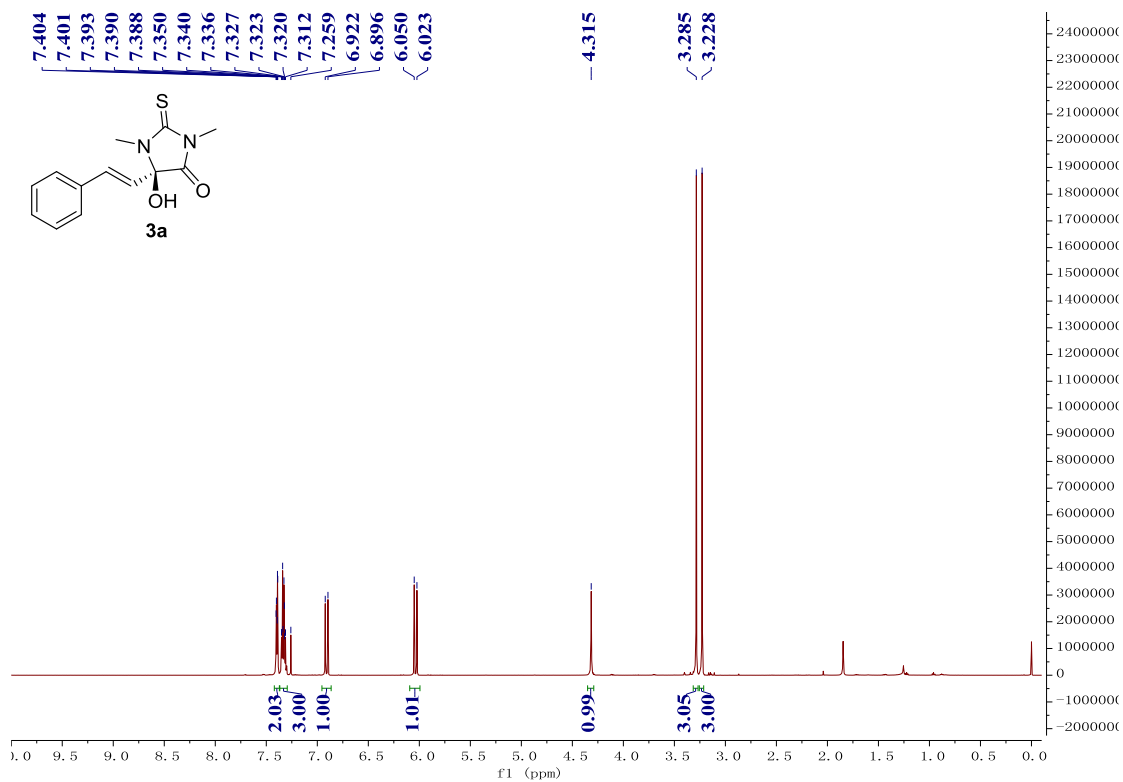

### <sup>13</sup>C NMR for 3a

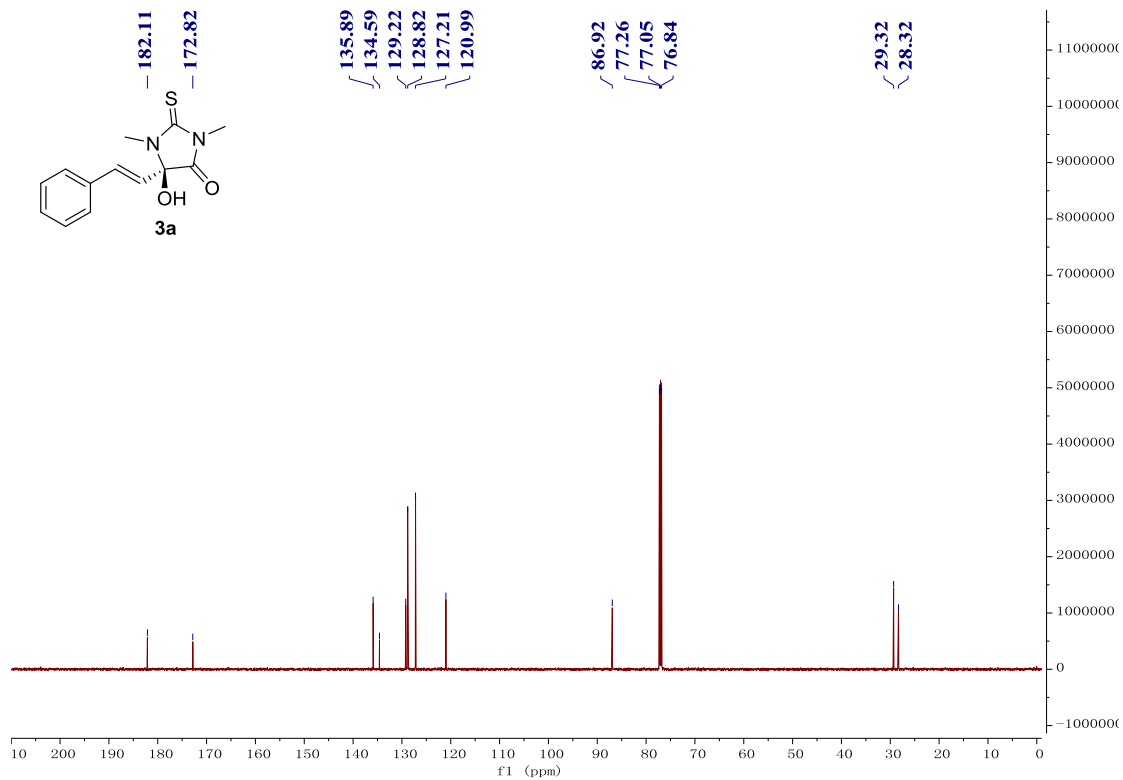

### <sup>1</sup>H NMR for 3b

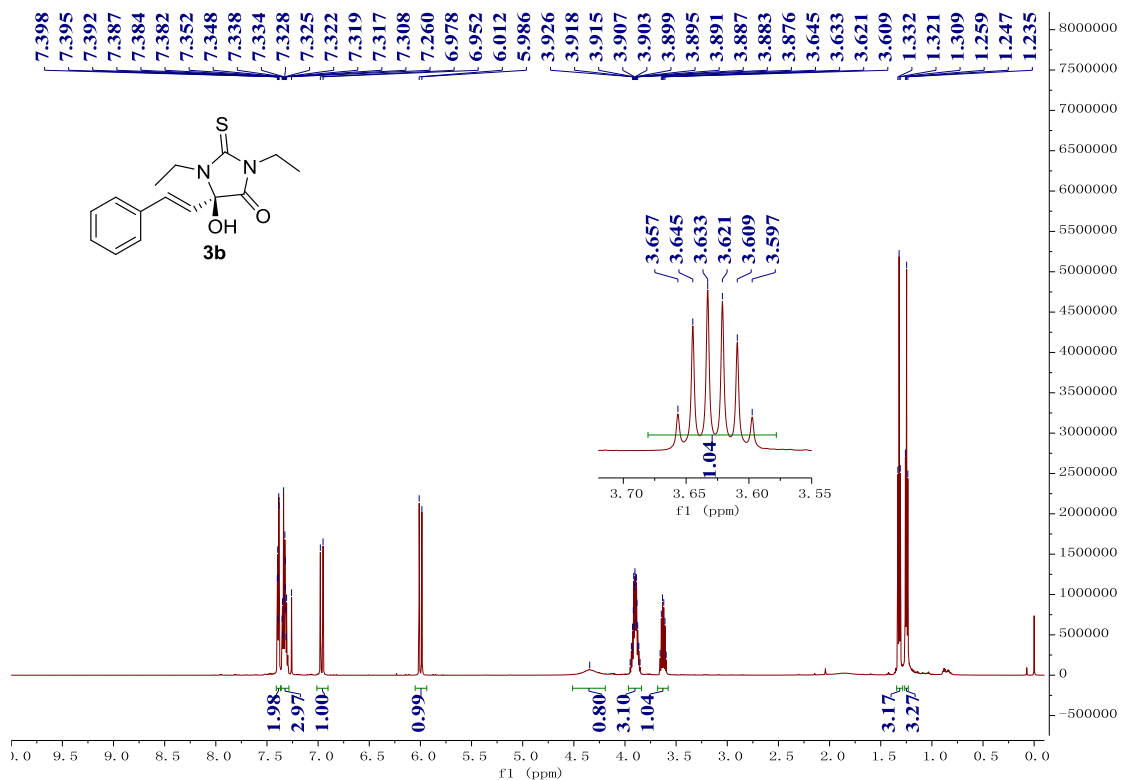

### <sup>13</sup>C NMR for 3b

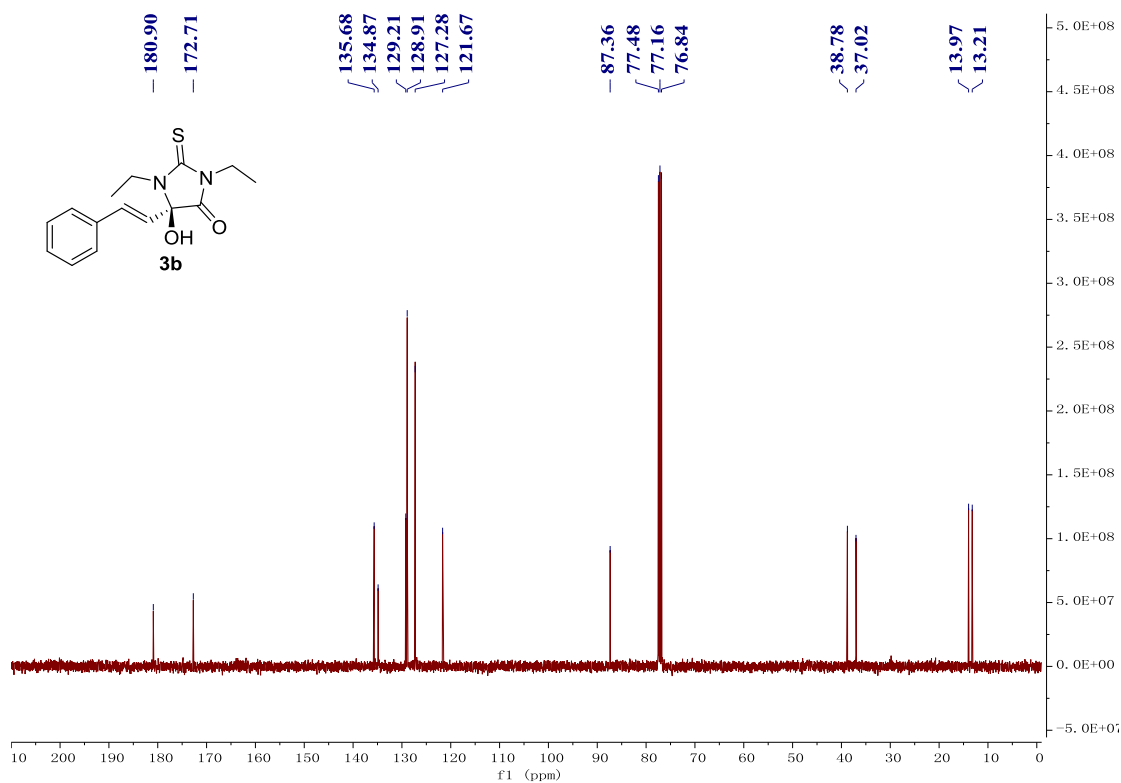



### <sup>1</sup>H NMR for 3c

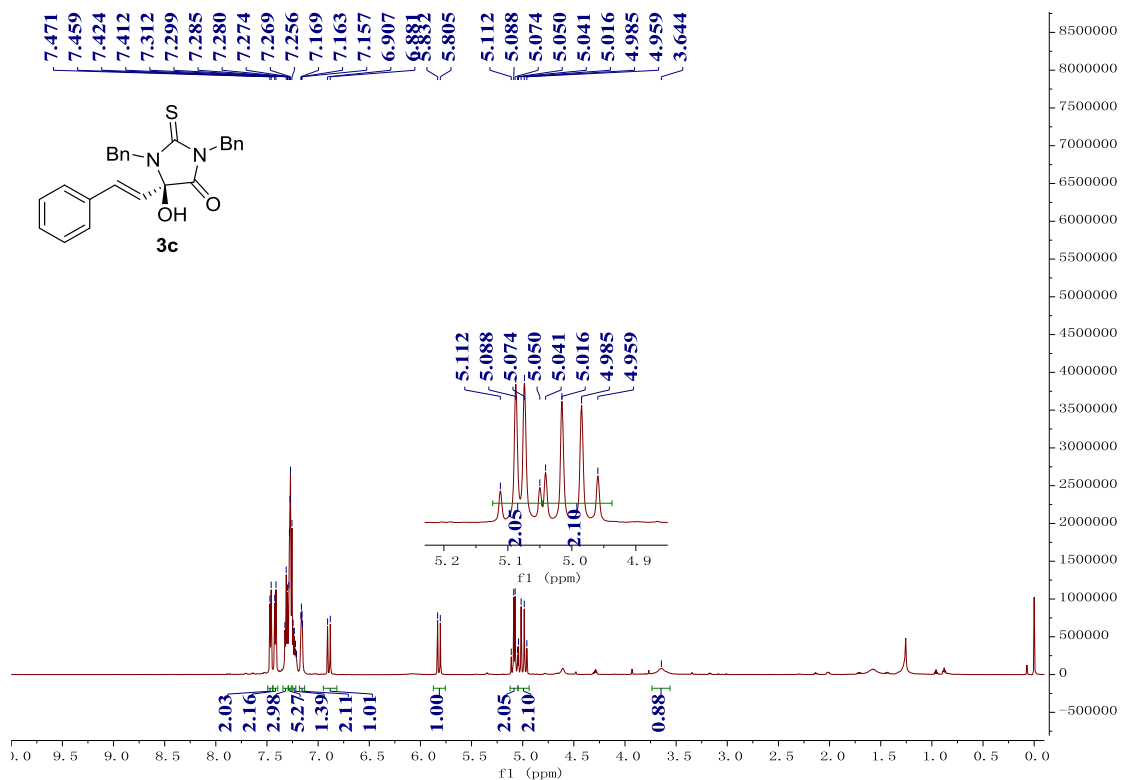

### <sup>13</sup>C NMR for 3c

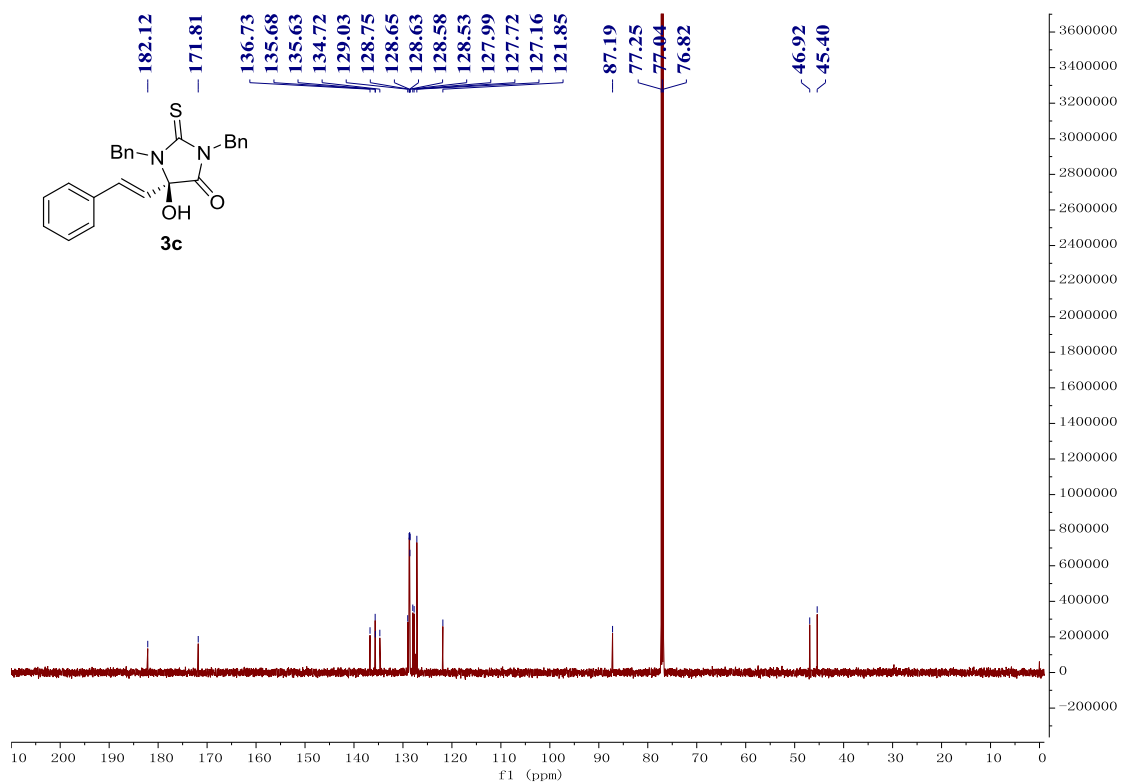

### <sup>1</sup>H NMR for 3d

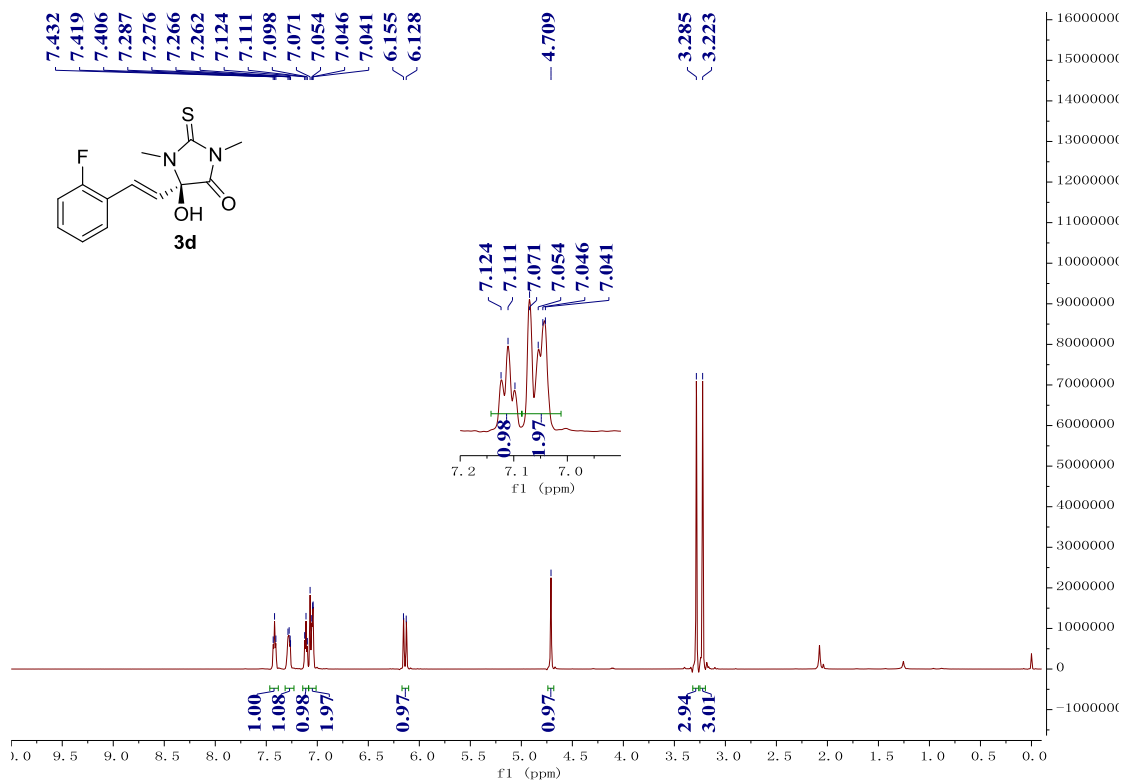

### <sup>13</sup>C NMR for 3d

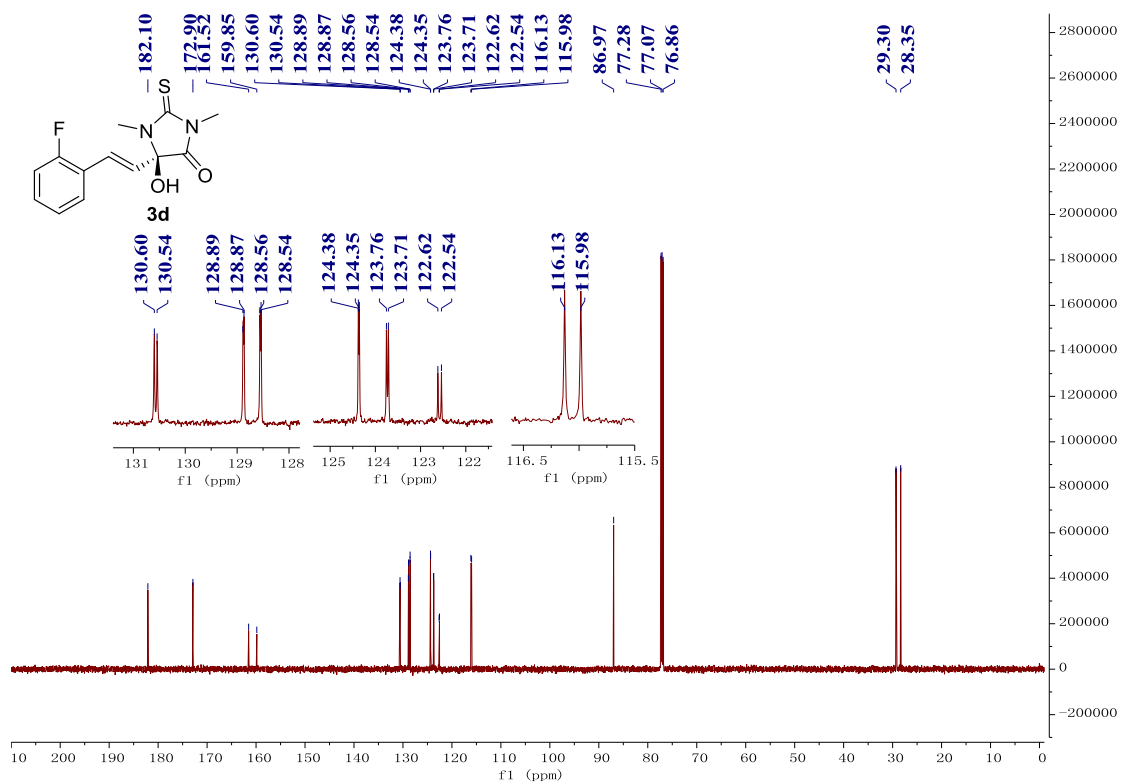

### <sup>1</sup>H NMR for 3e

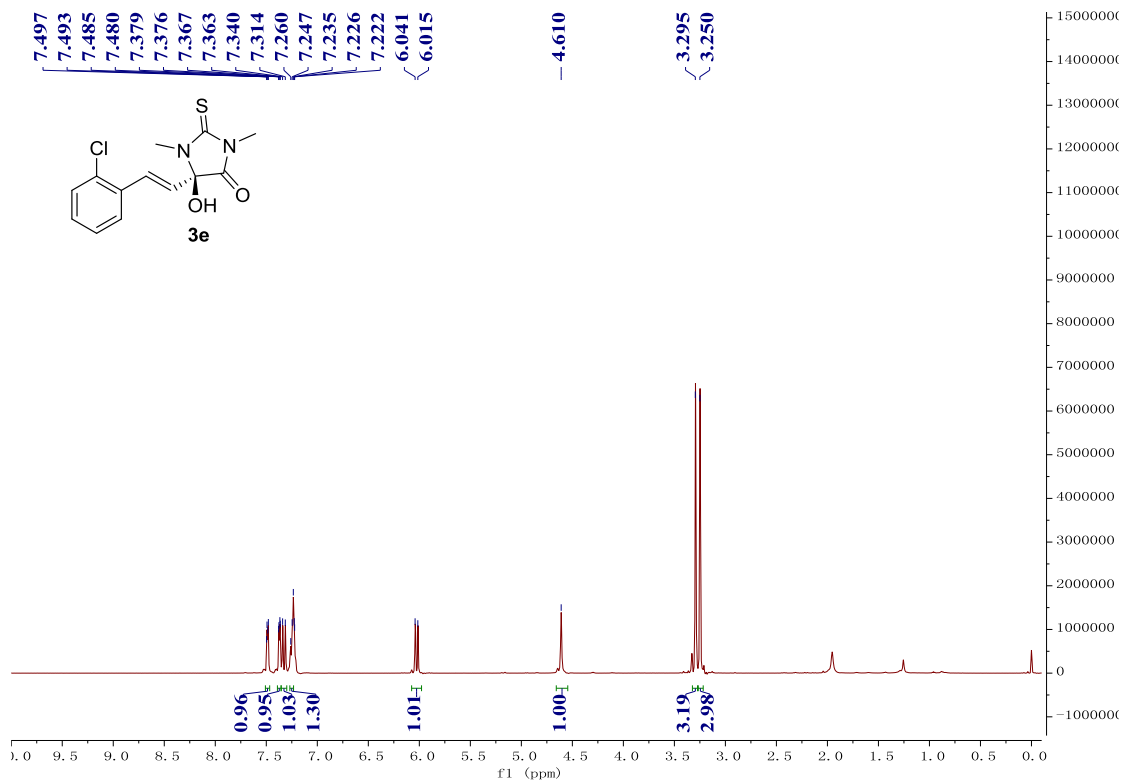

### <sup>13</sup>C NMR for 3e

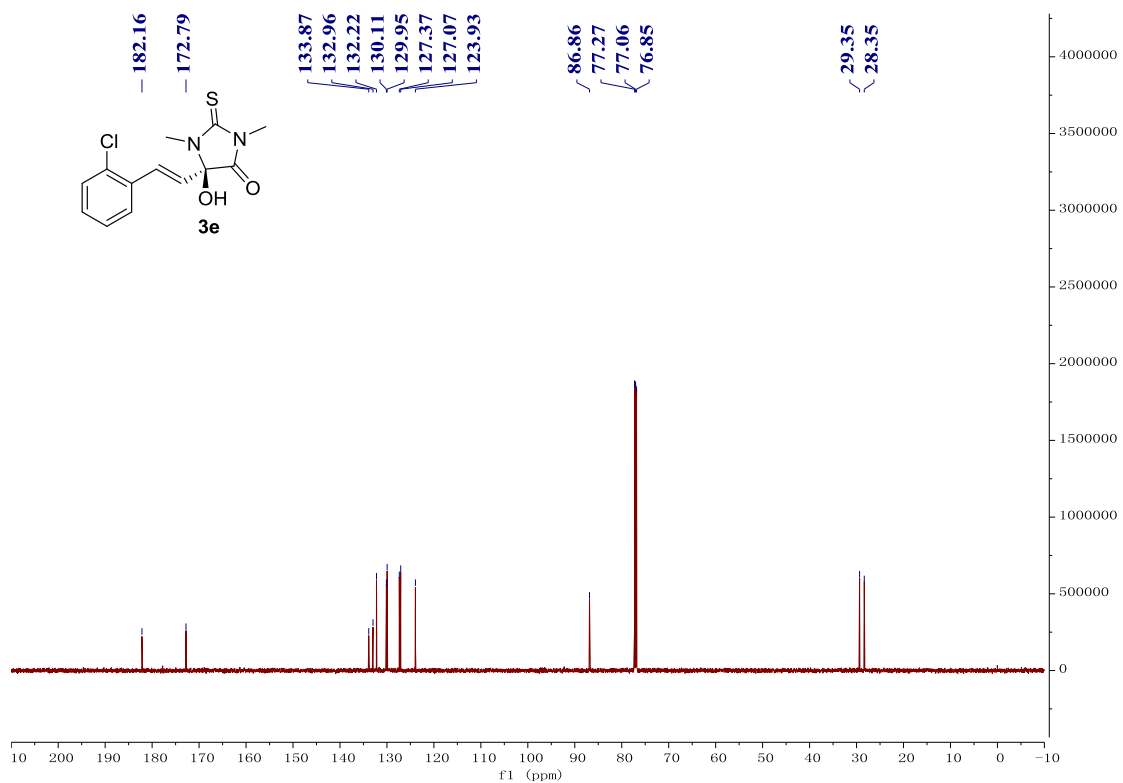

### <sup>1</sup>H NMR for 3f

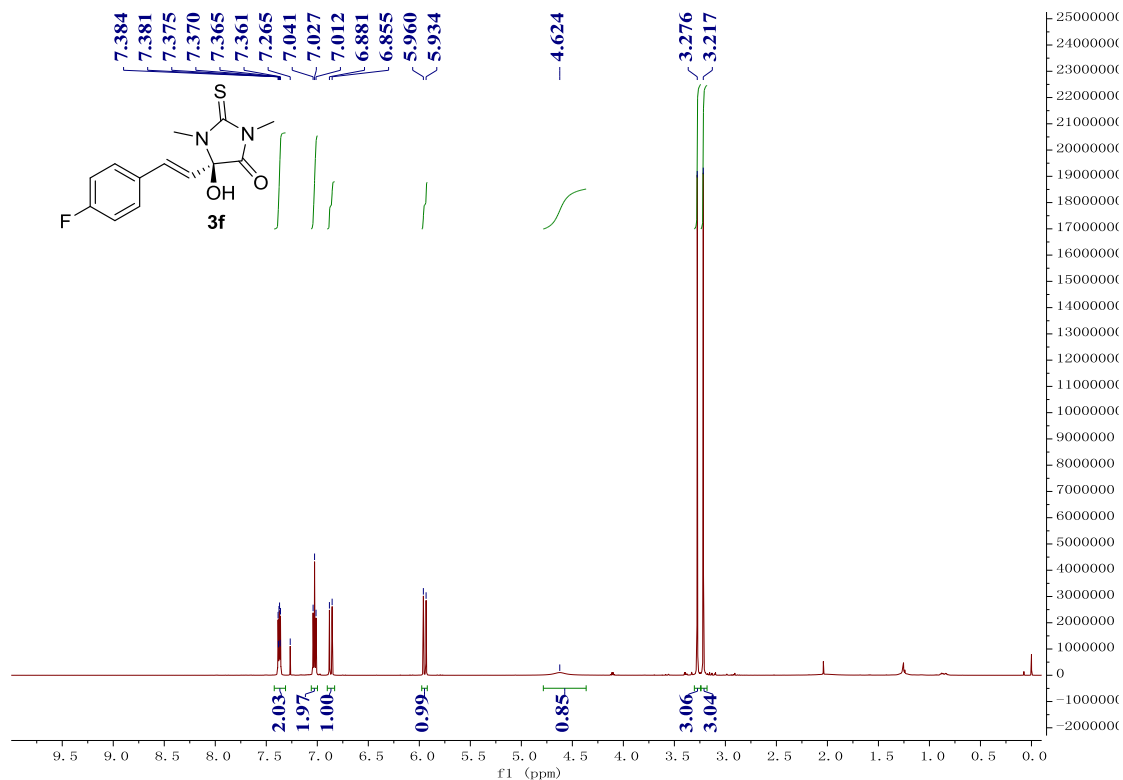

### <sup>13</sup>C NMR for 3f

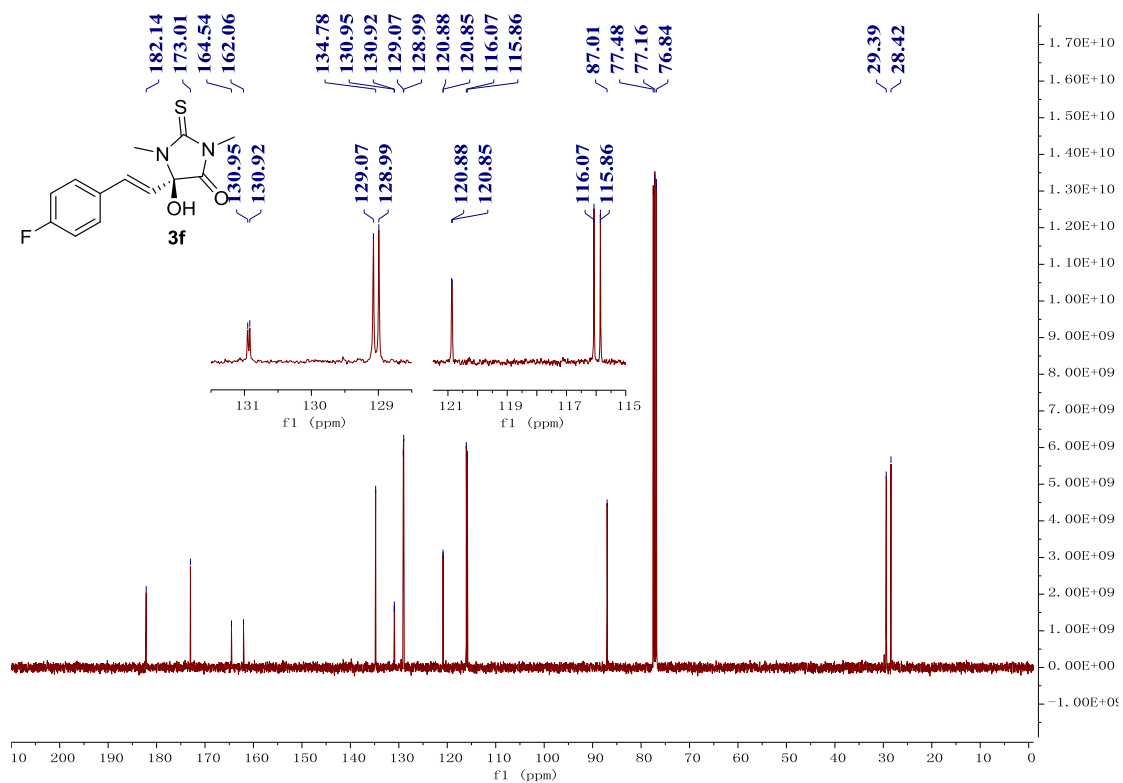

### <sup>1</sup>H NMR for 3g

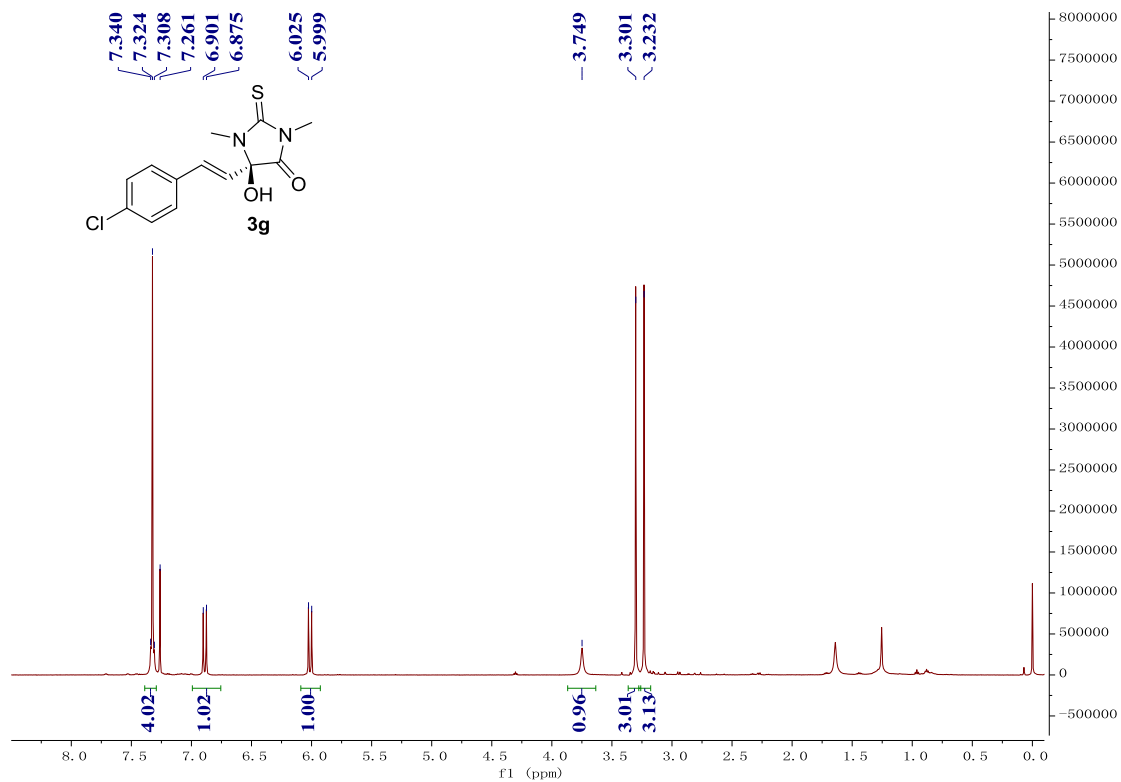

### <sup>13</sup>C NMR for 3g

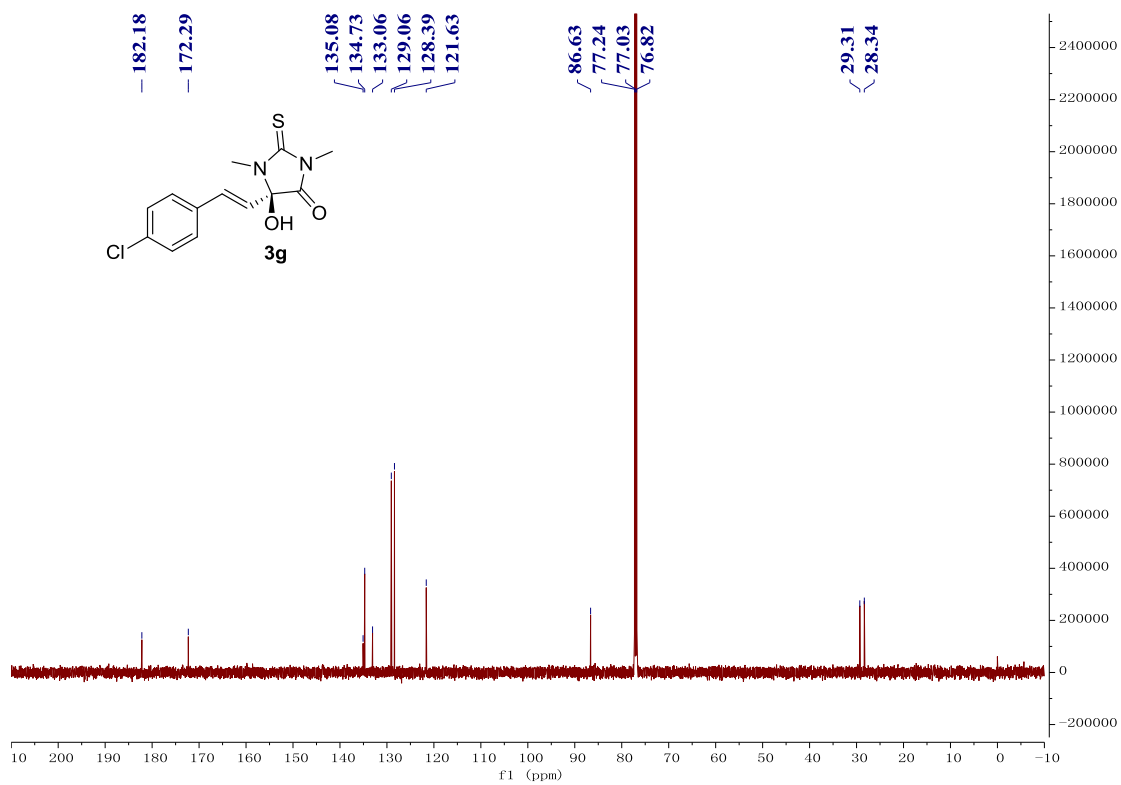

### <sup>1</sup>H NMR for 3h

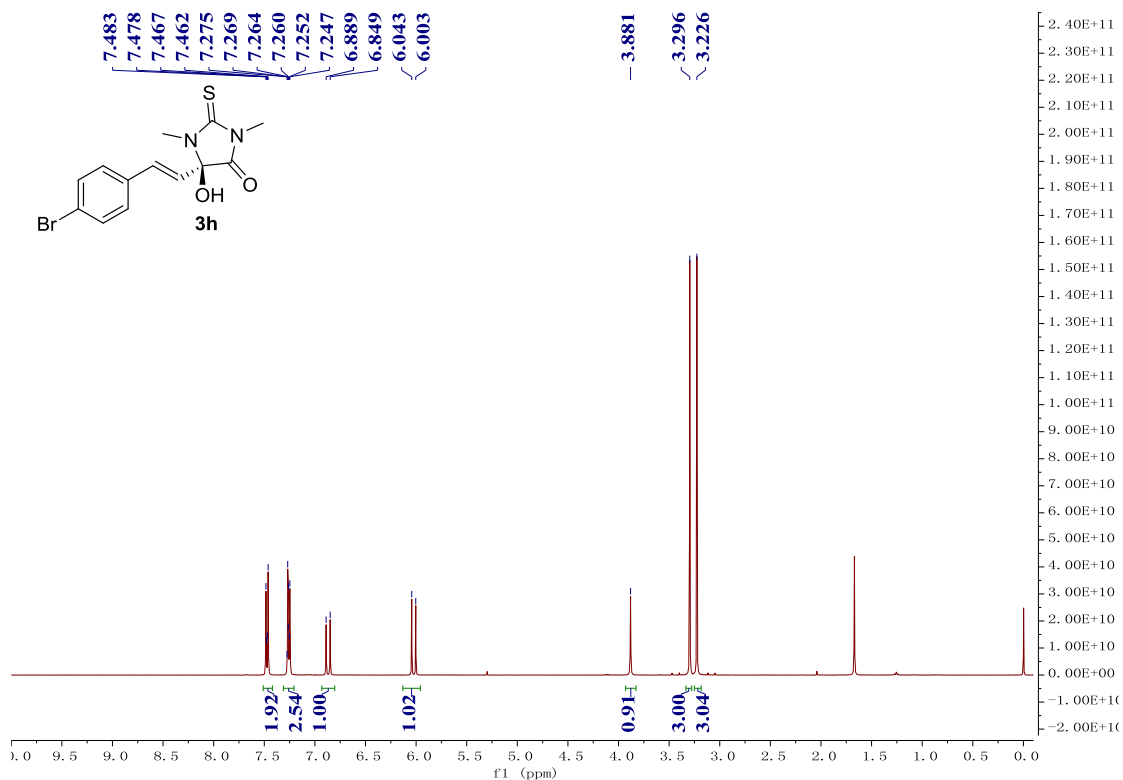

### <sup>13</sup>C NMR for 3h

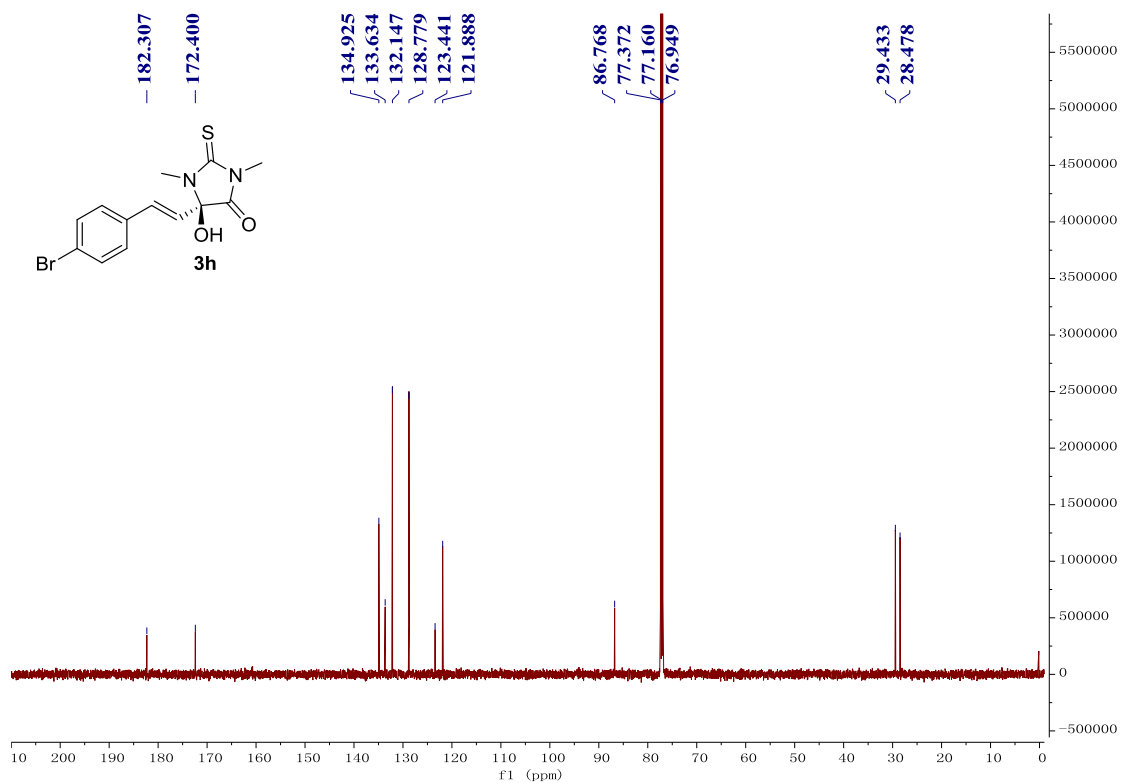

### <sup>1</sup>H NMR for 3i

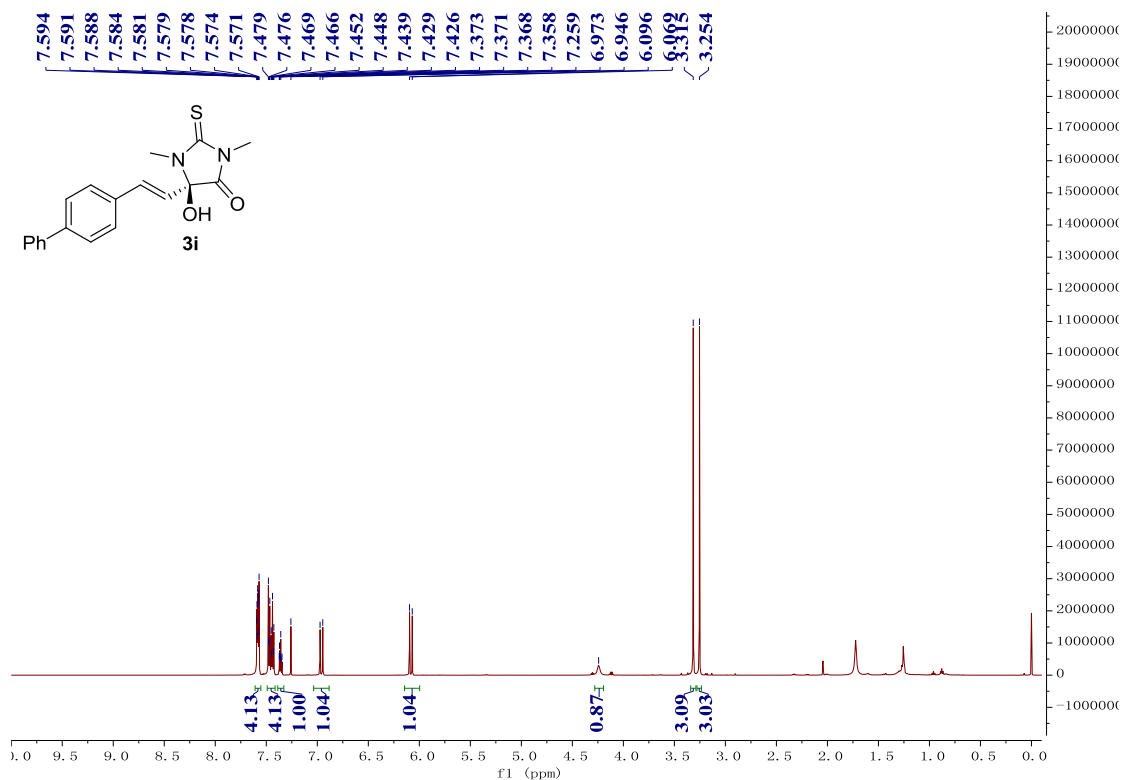

### <sup>13</sup>C NMR for 3i

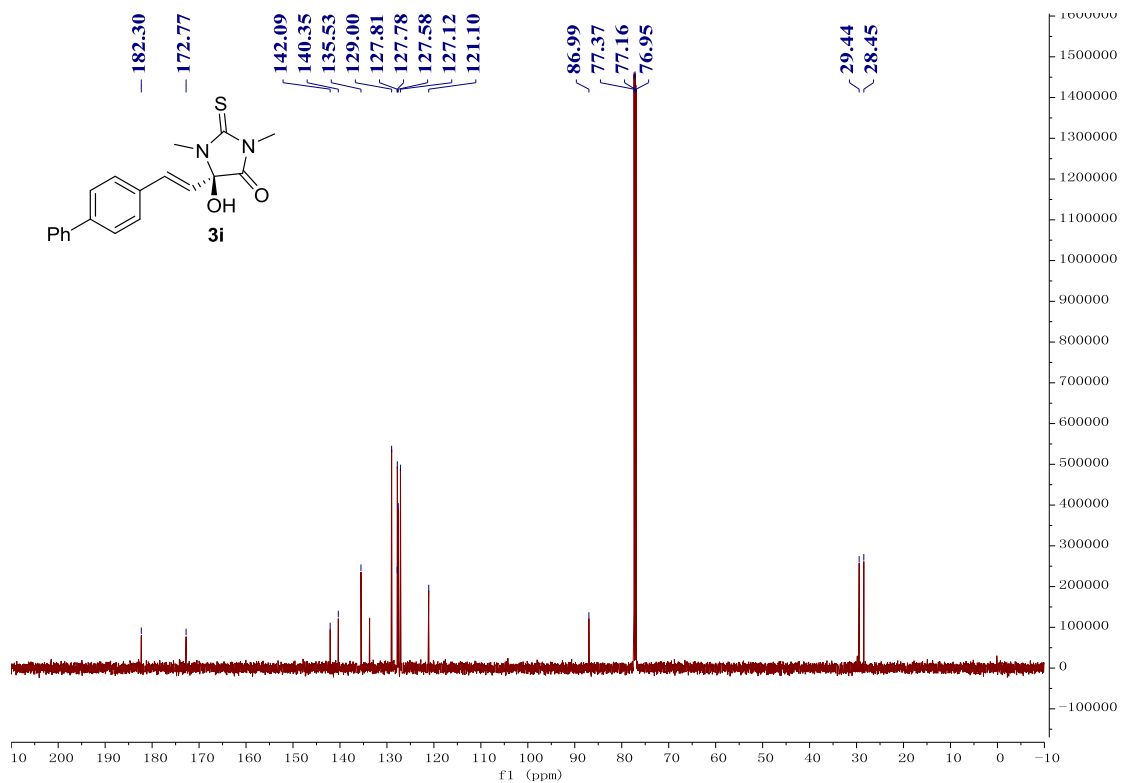

### <sup>1</sup>H NMR for 3j

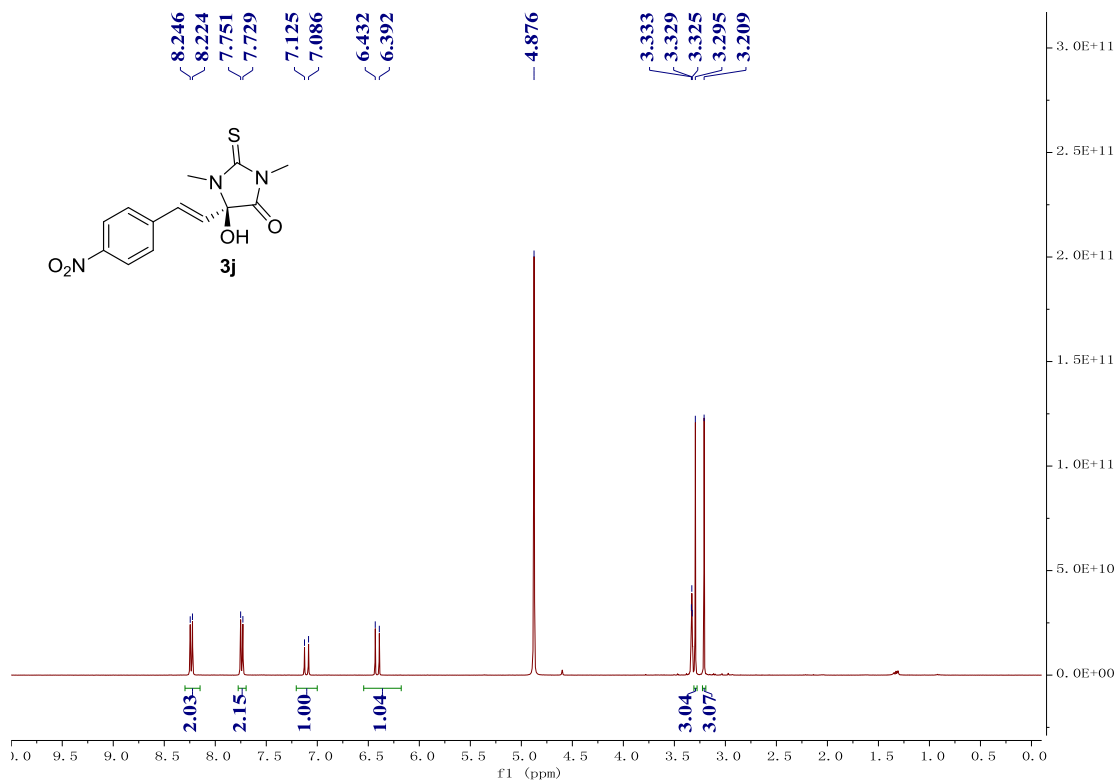

### <sup>13</sup>C NMR for 3j

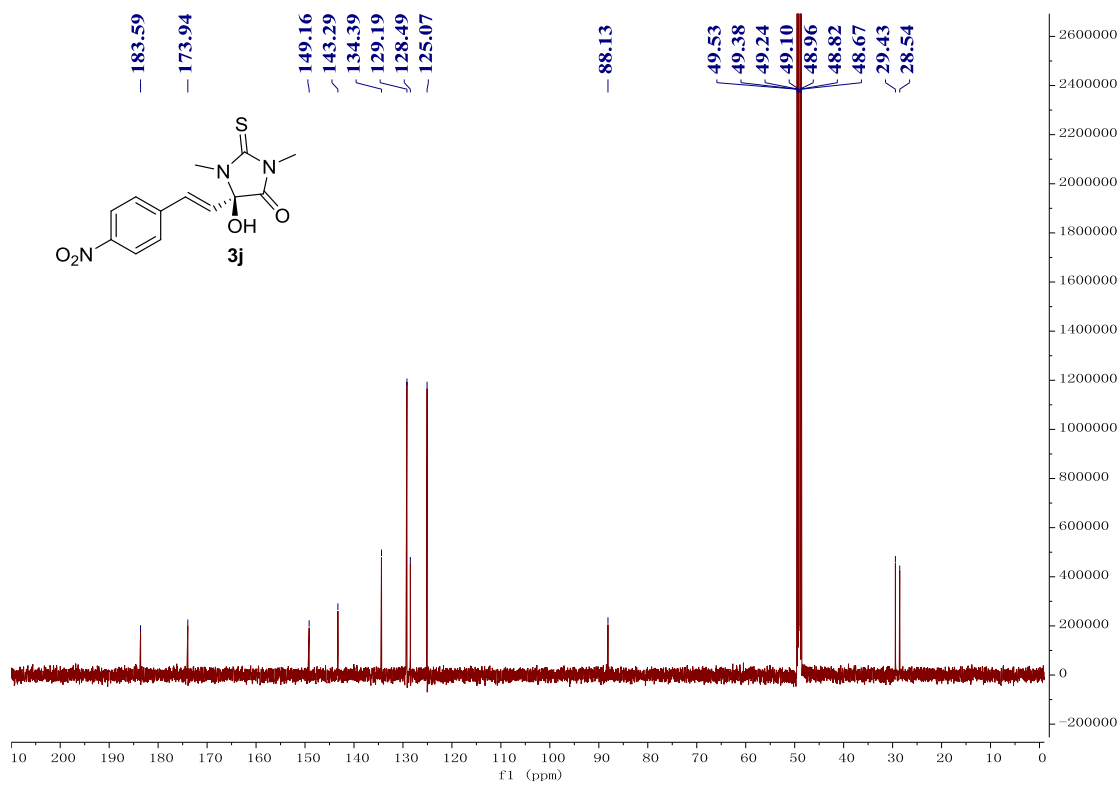



**<sup>1</sup>H NMR for 3k**

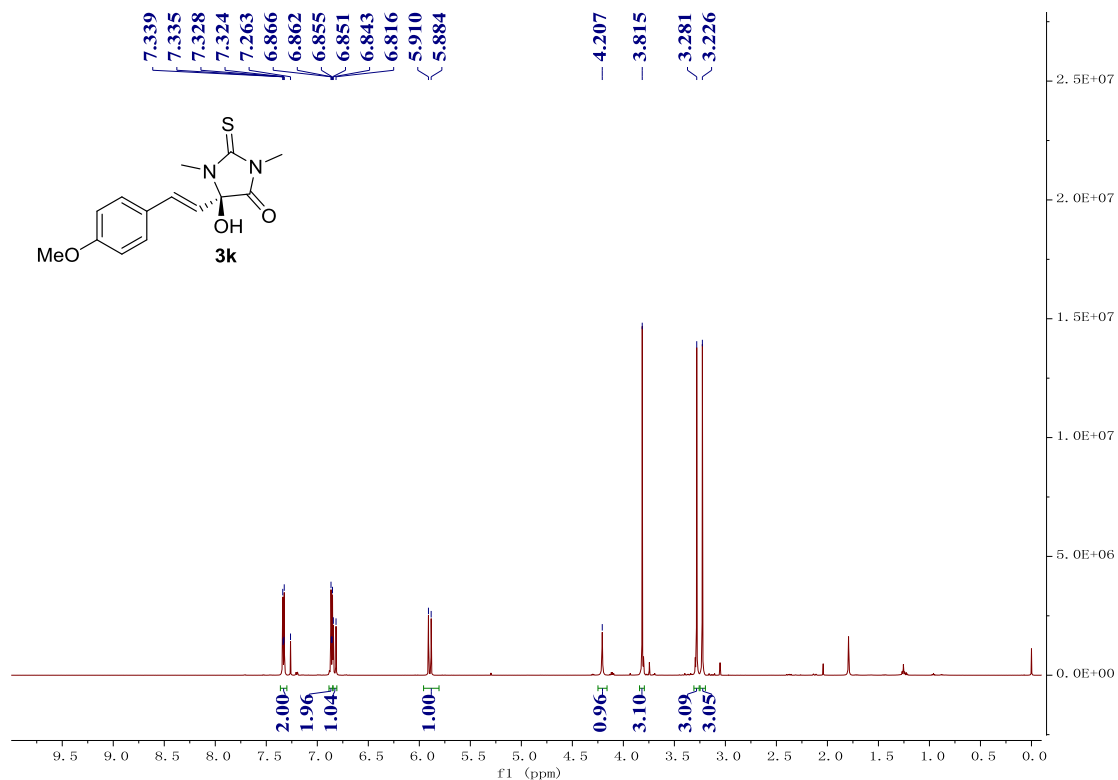

**<sup>13</sup>C NMR for 3k**

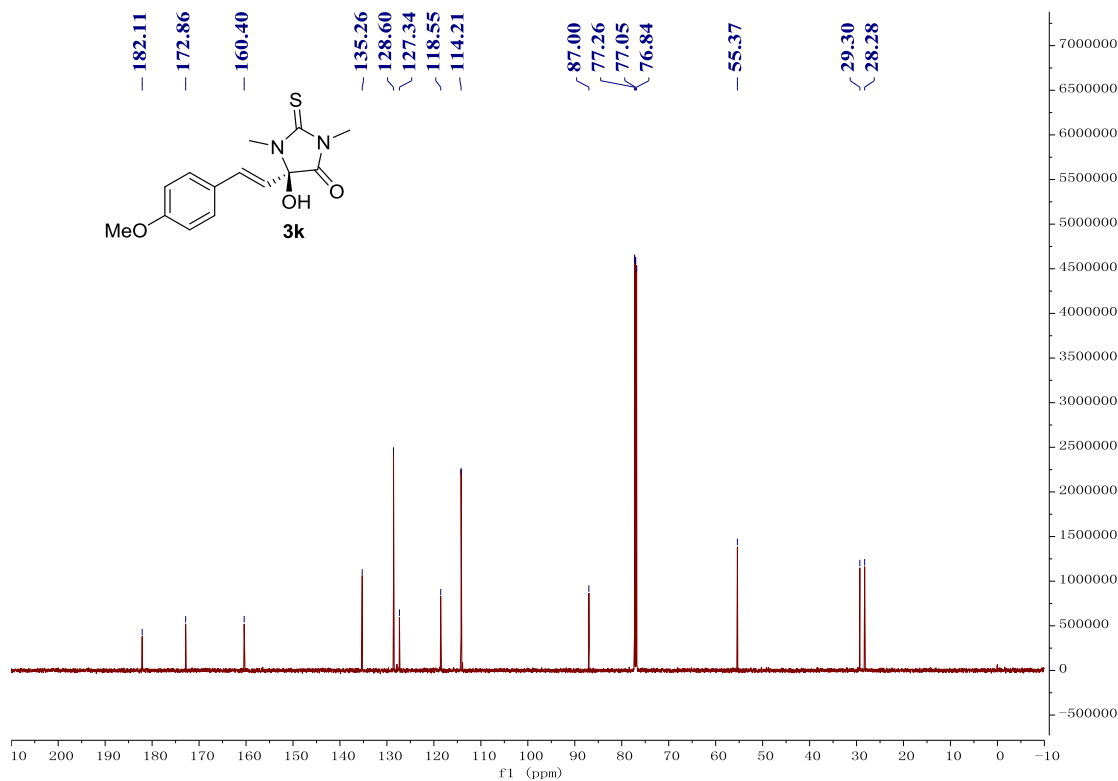

### <sup>1</sup>H NMR for 3I

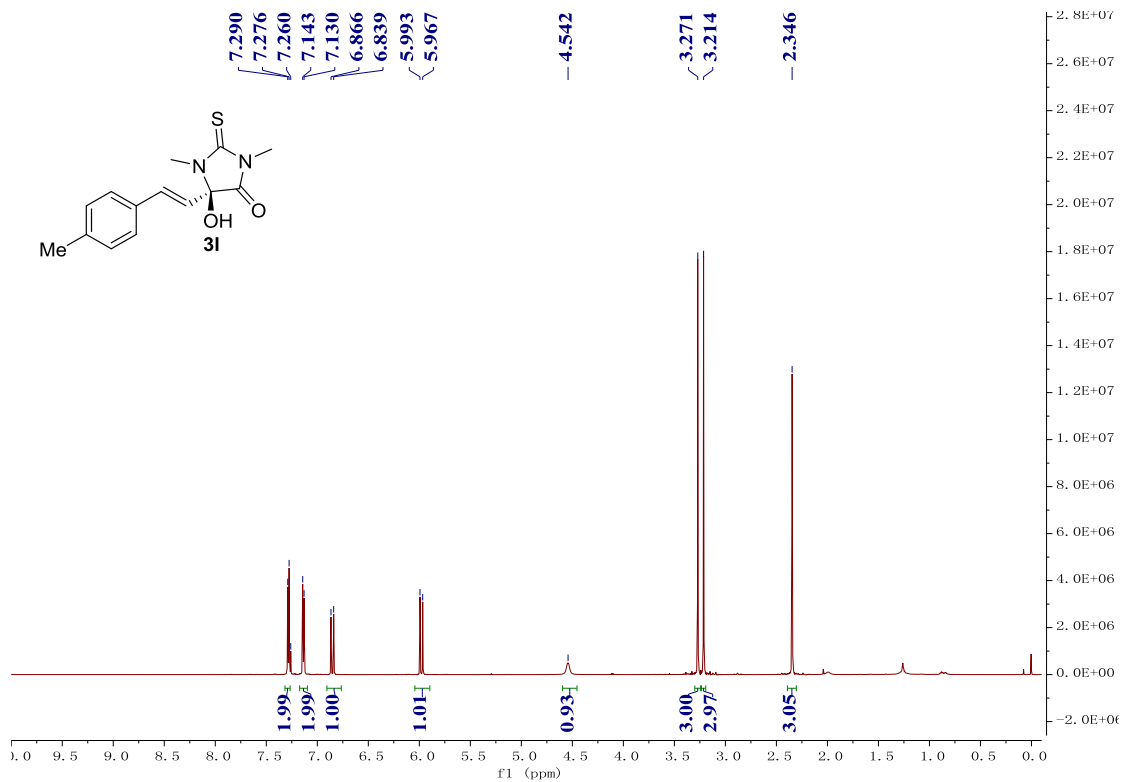

### <sup>13</sup>C NMR for 3I

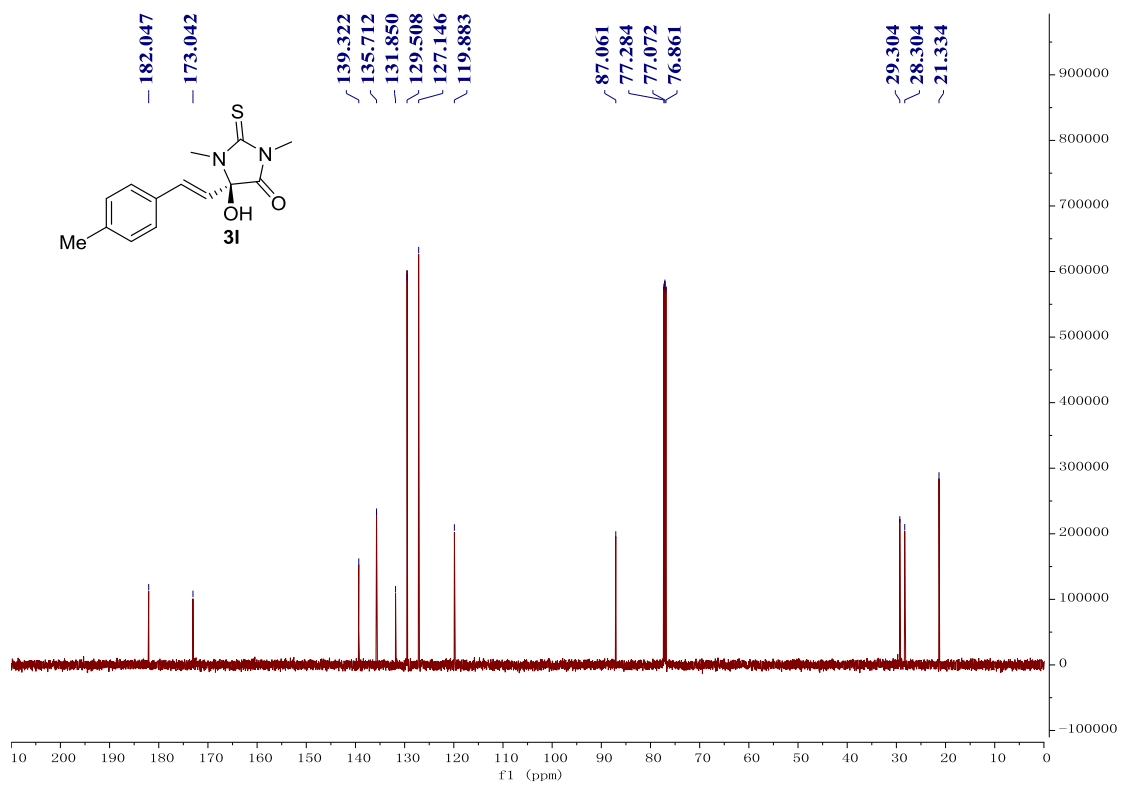

### <sup>1</sup>H NMR for 3m

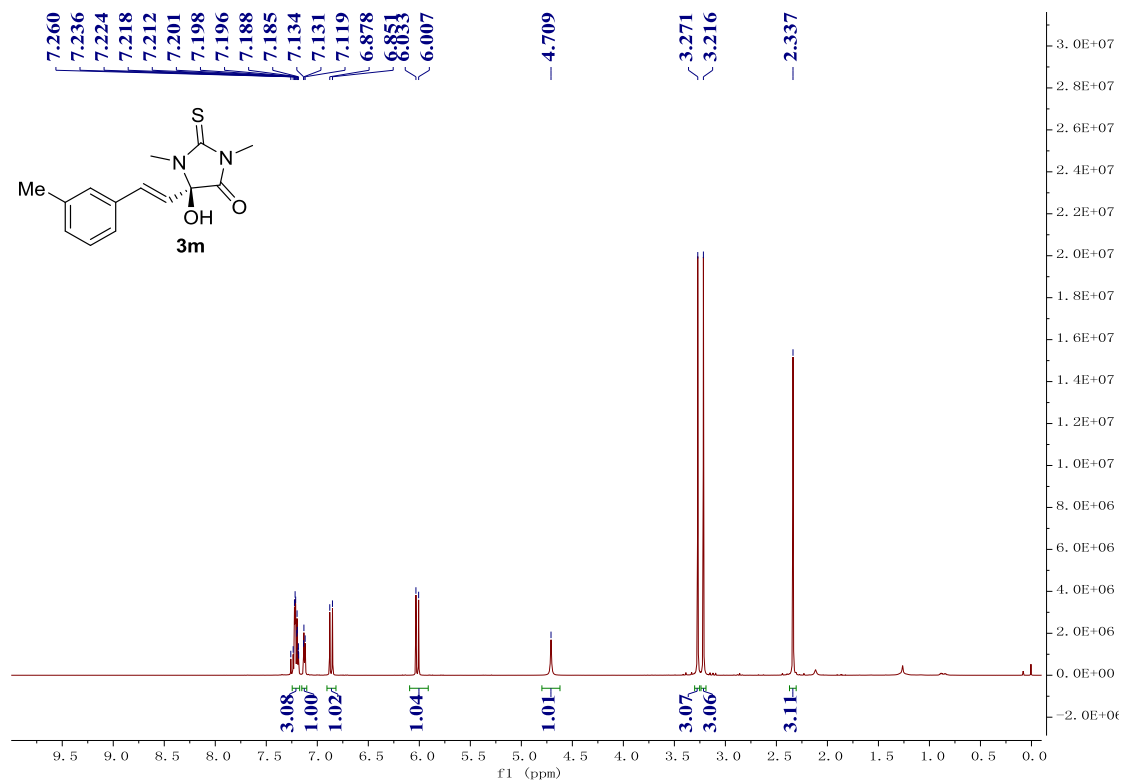

### <sup>13</sup>C NMR for 3m

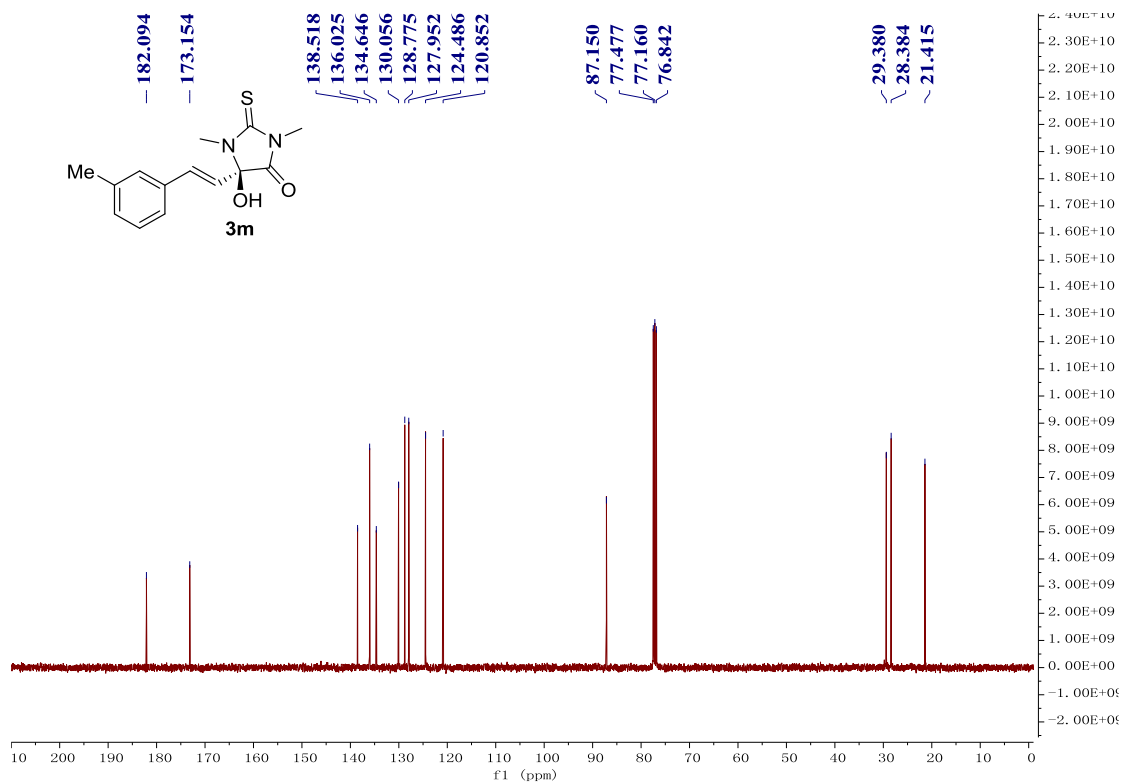

### <sup>1</sup>H NMR for 3n

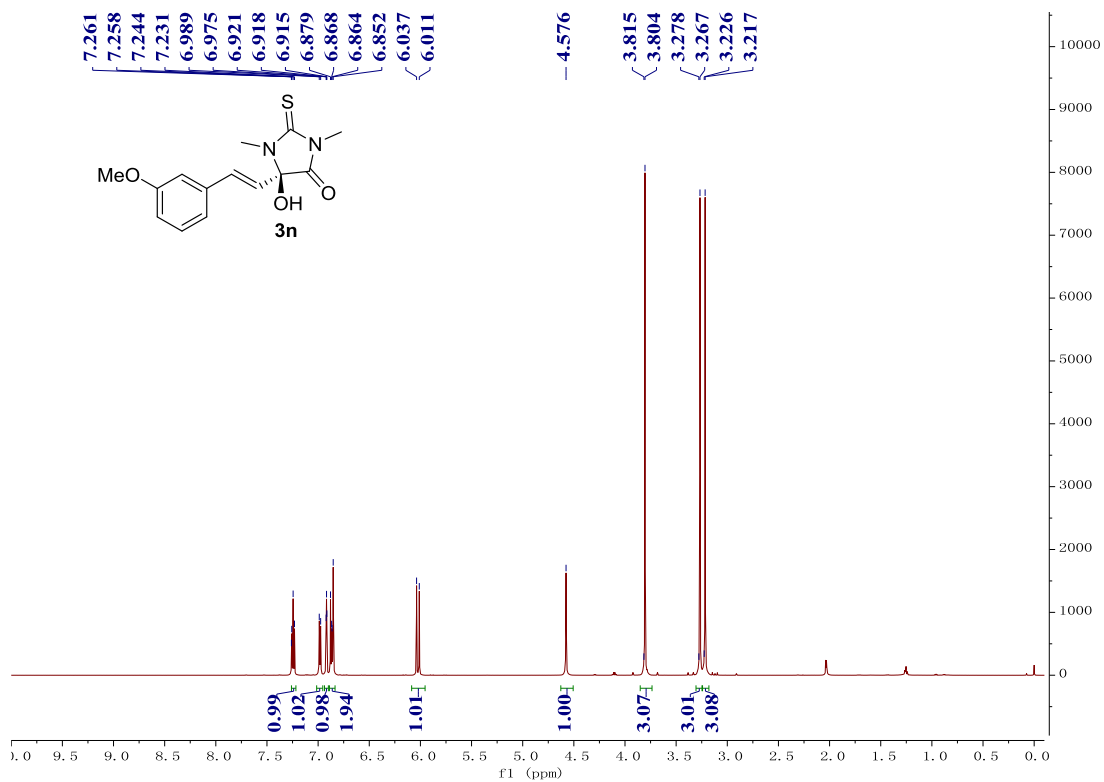

### <sup>13</sup>C NMR for 3n

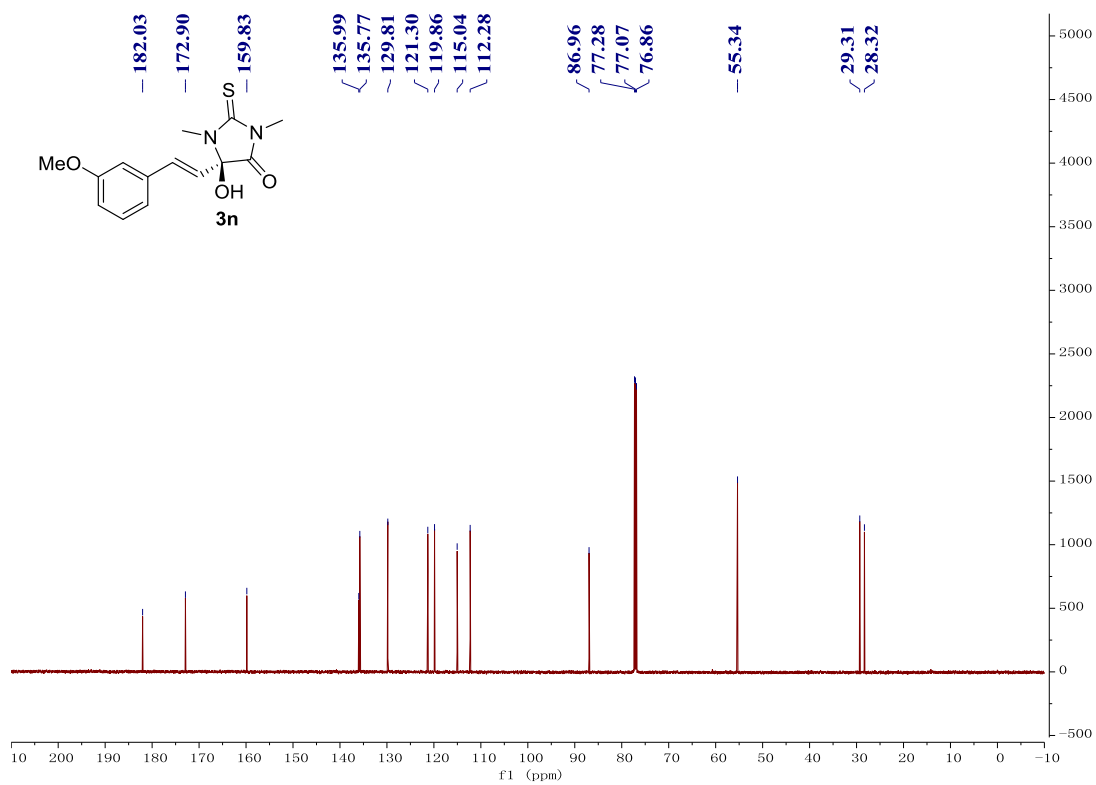

### <sup>1</sup>H NMR for 3o

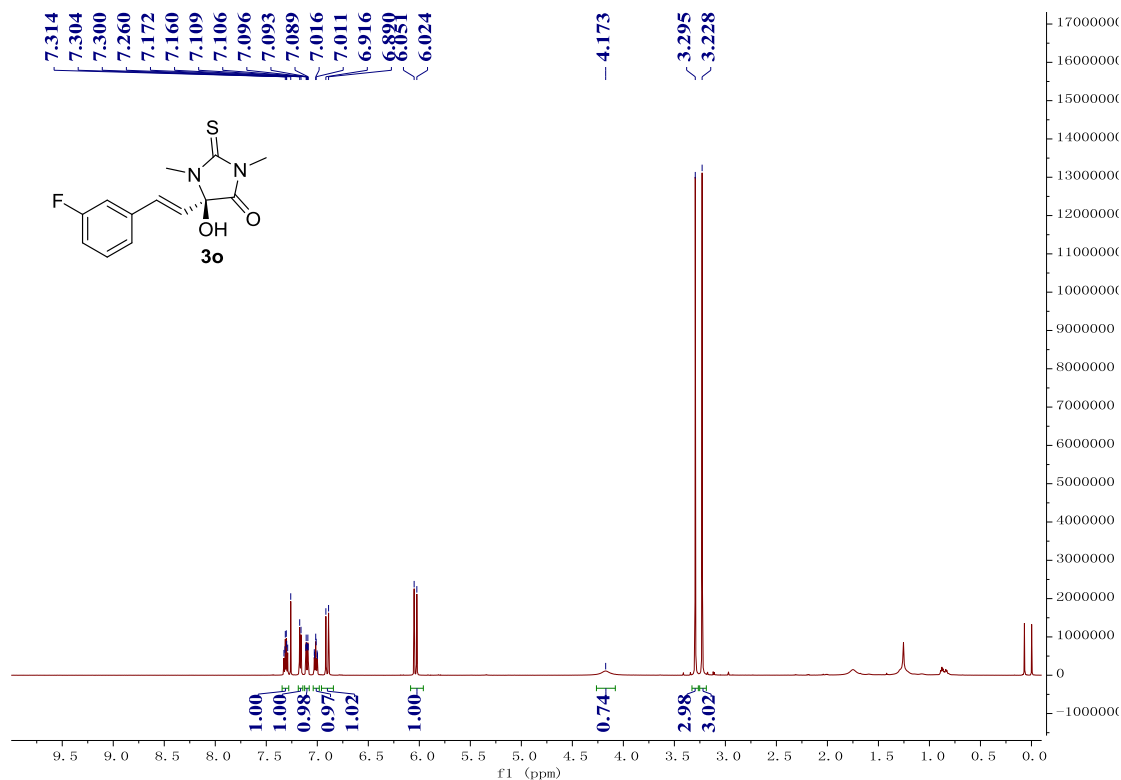

### <sup>13</sup>C NMR for 3o

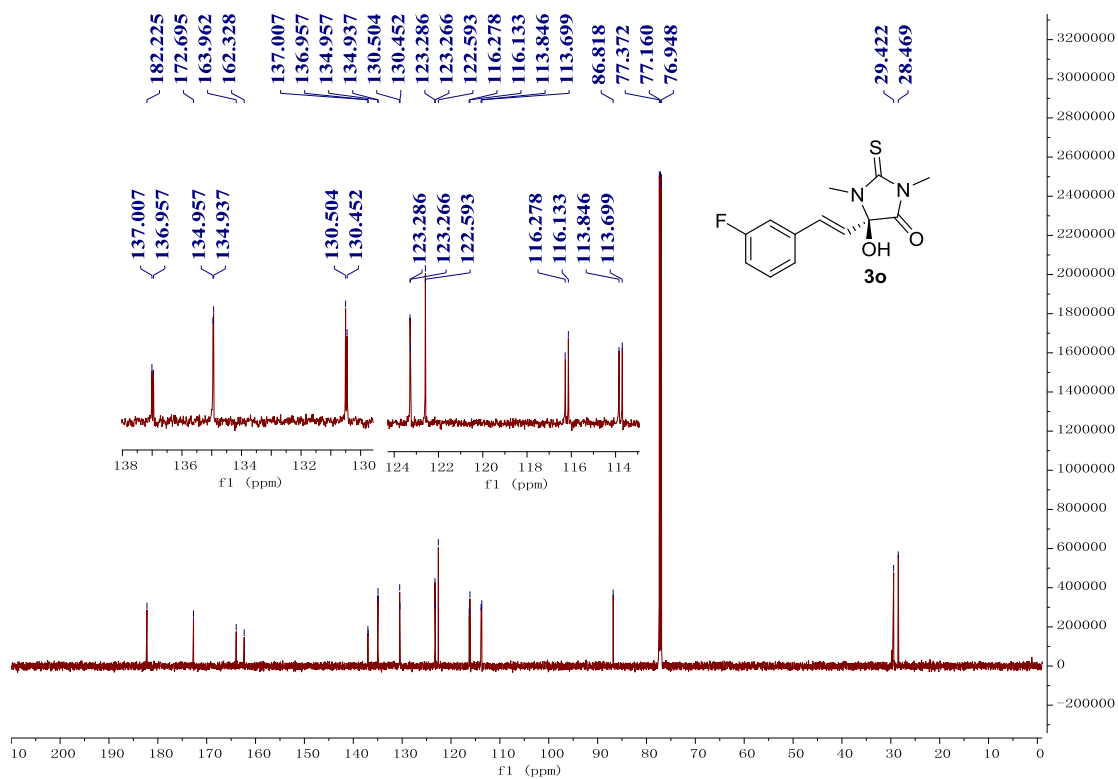

### <sup>1</sup>H NMR for 3p

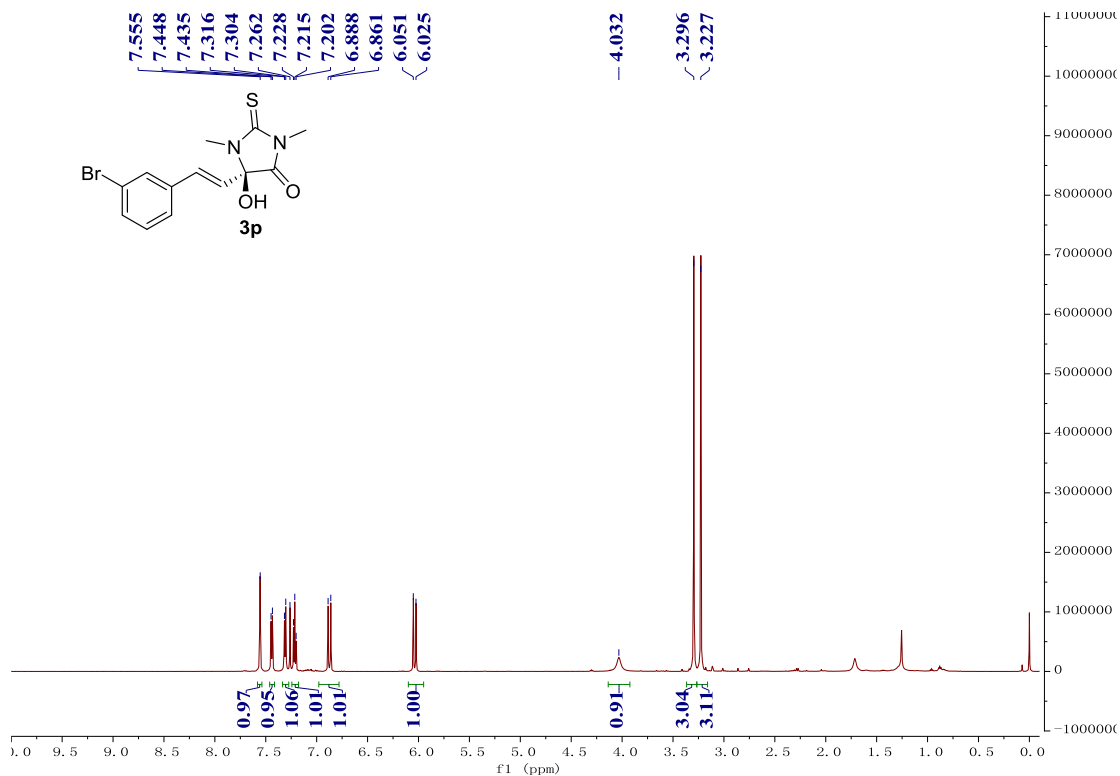

### <sup>13</sup>C NMR for 3p

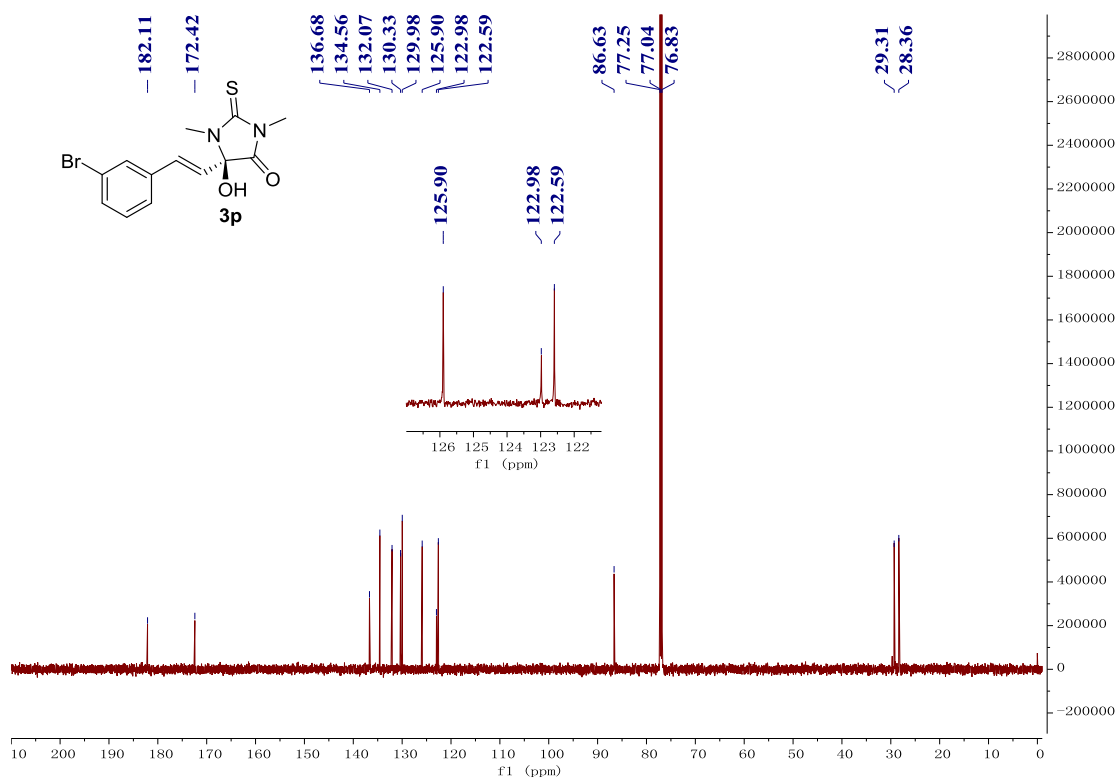

### <sup>1</sup>H NMR for 3q

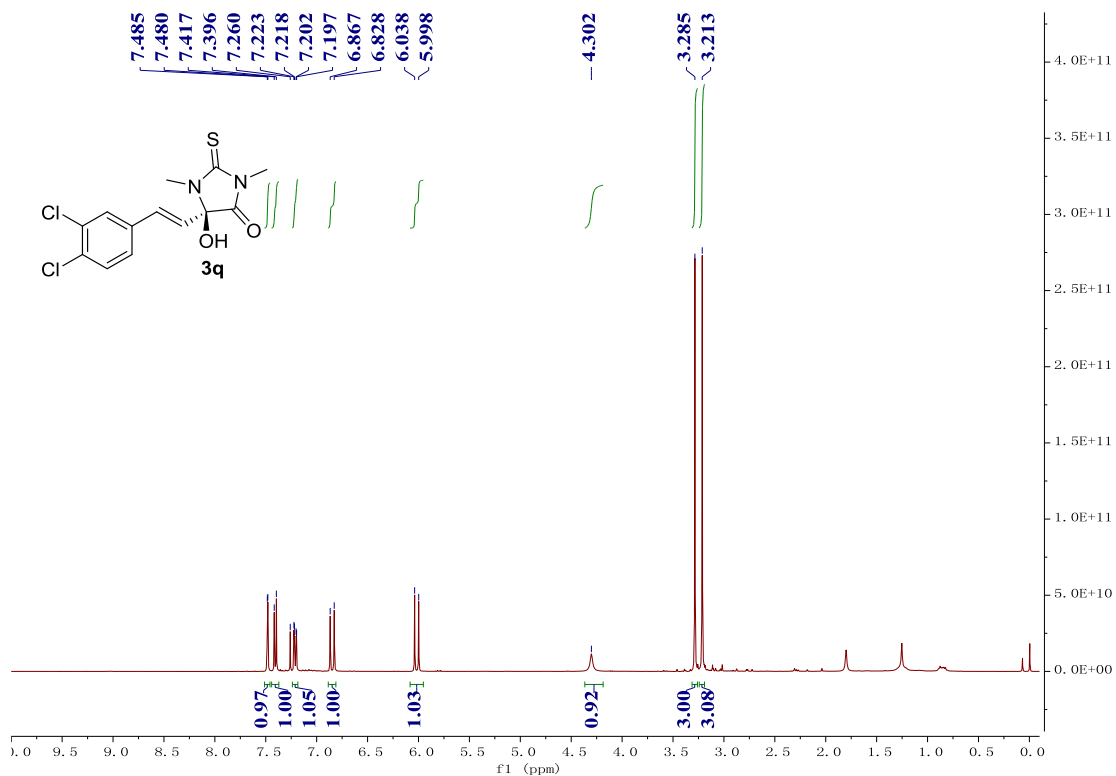

### <sup>13</sup>C NMR for 3q

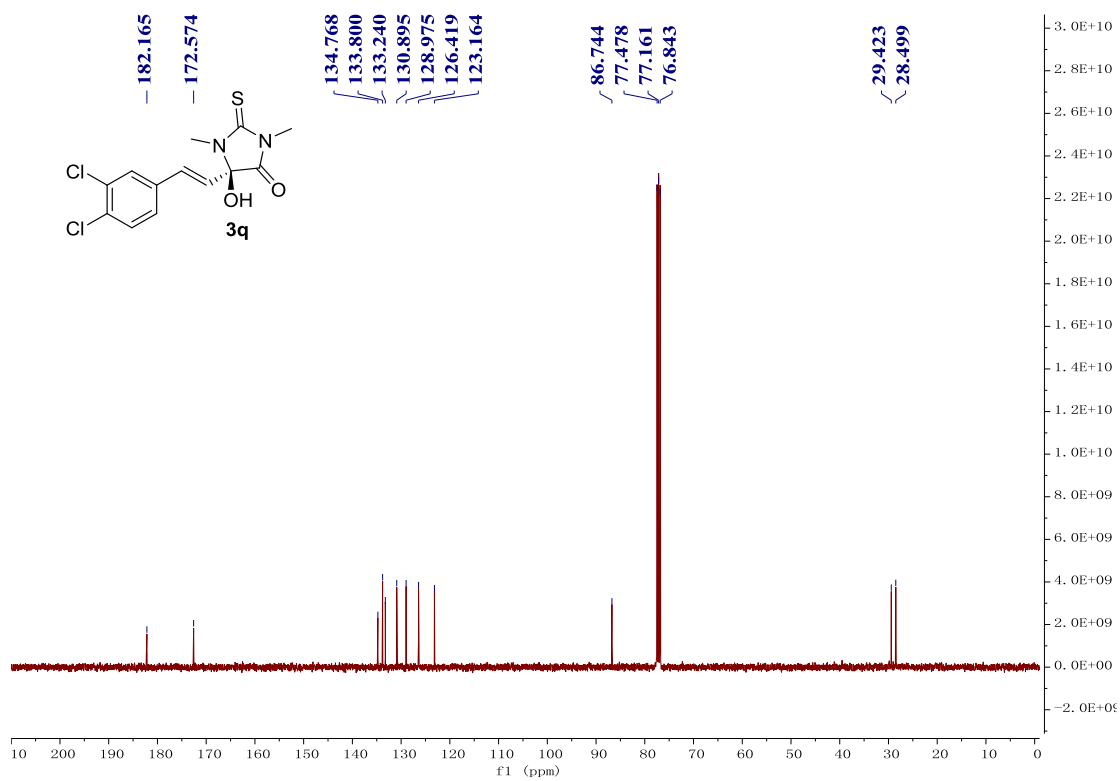

### <sup>1</sup>H NMR for 3r

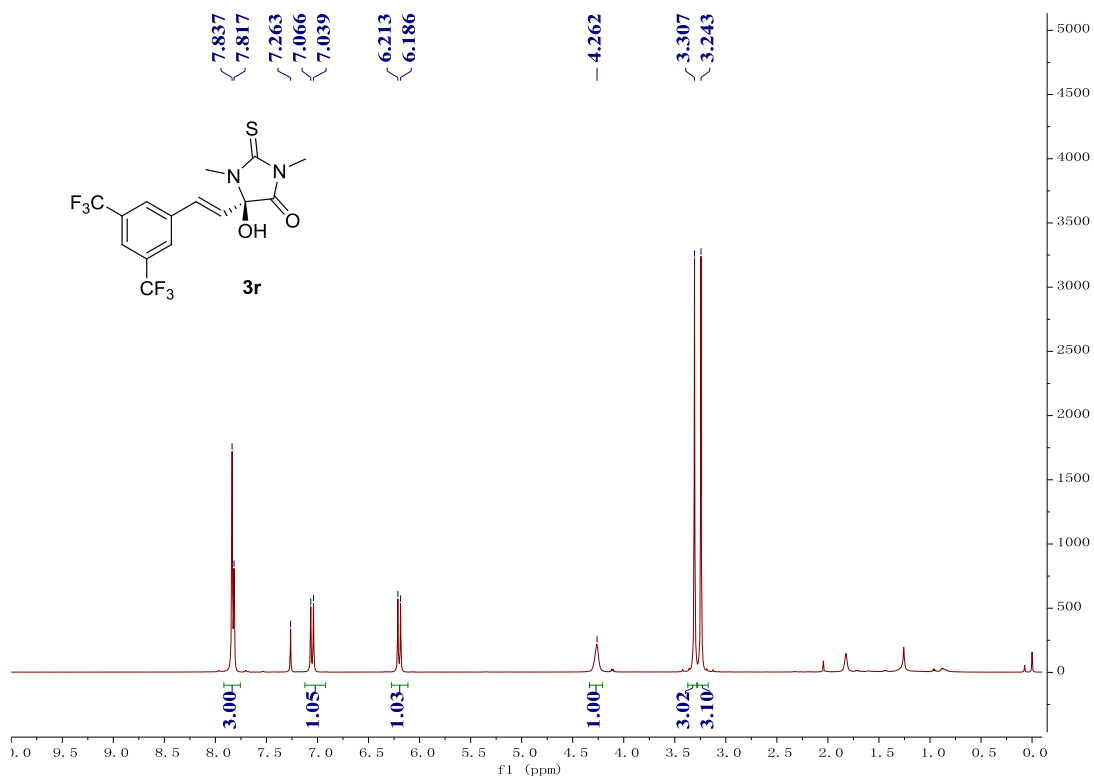

### <sup>13</sup>C NMR for 3r

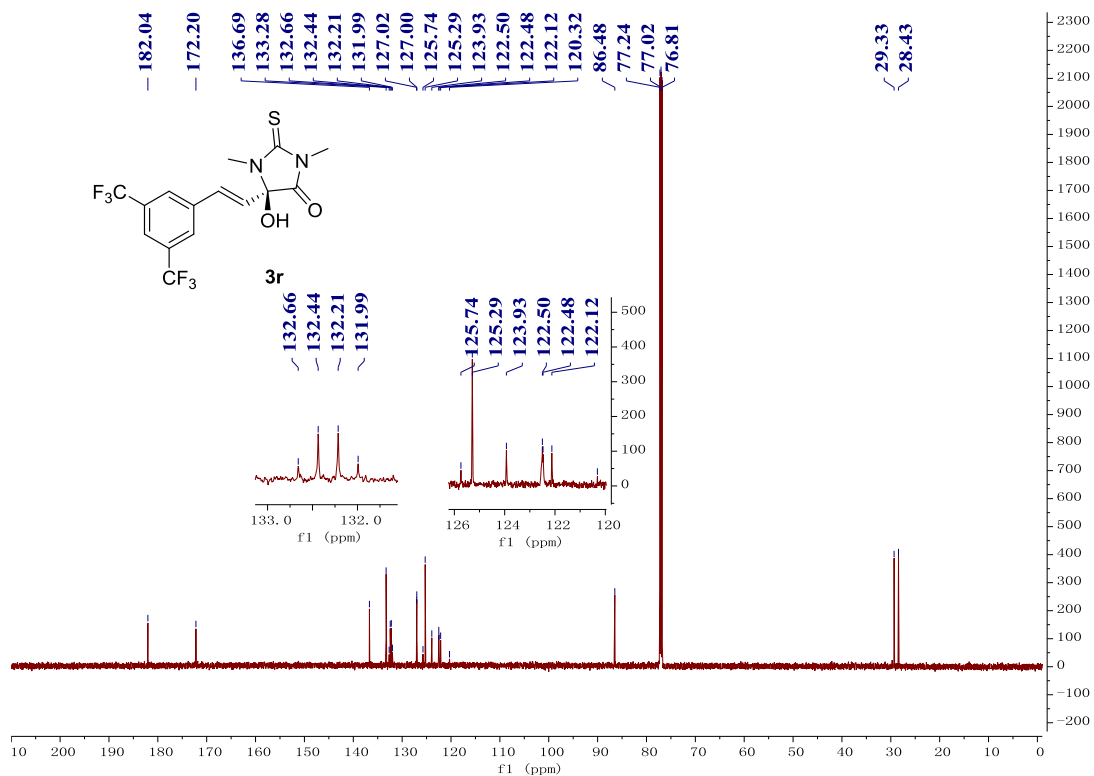



### <sup>1</sup>H NMR for 3s

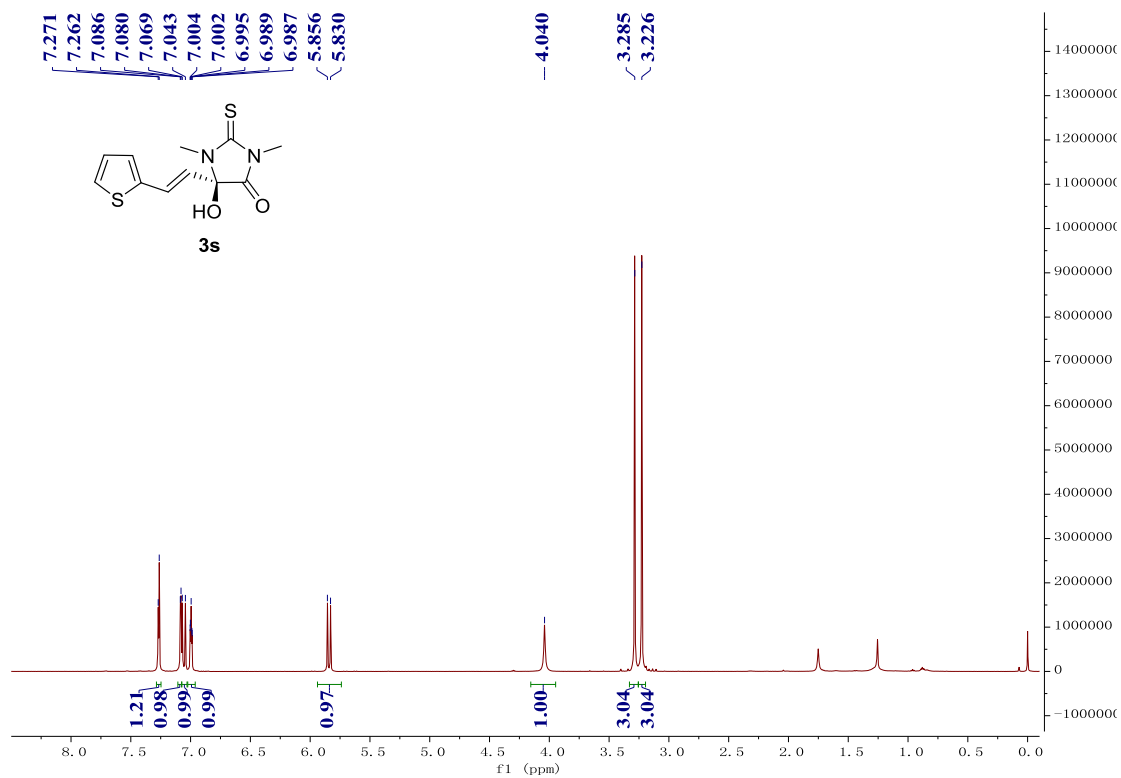

### <sup>13</sup>C NMR for 3s

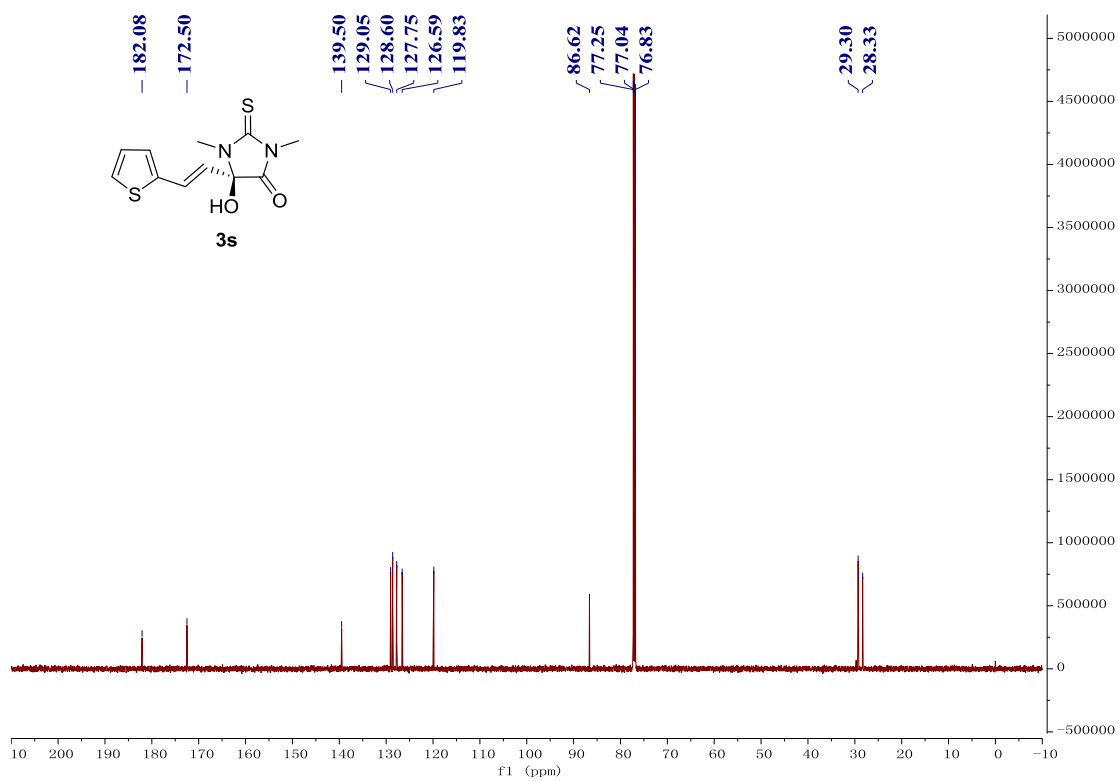

### <sup>1</sup>H NMR for 3t

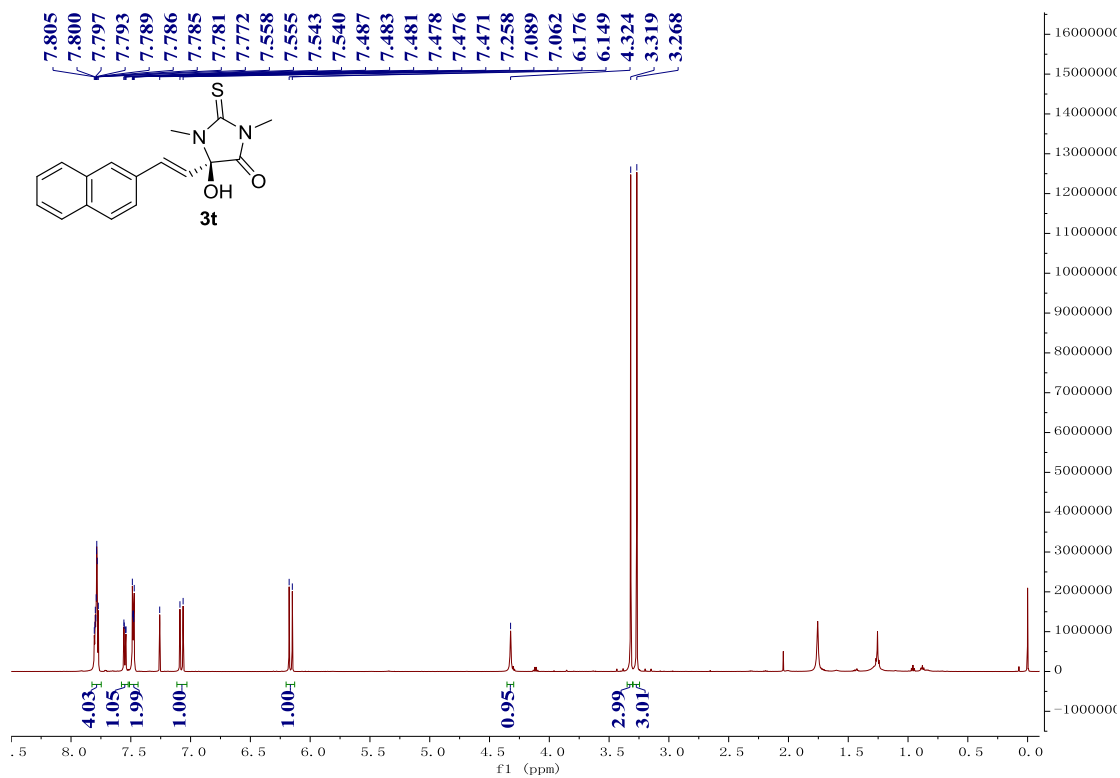

### <sup>13</sup>C NMR for 3t

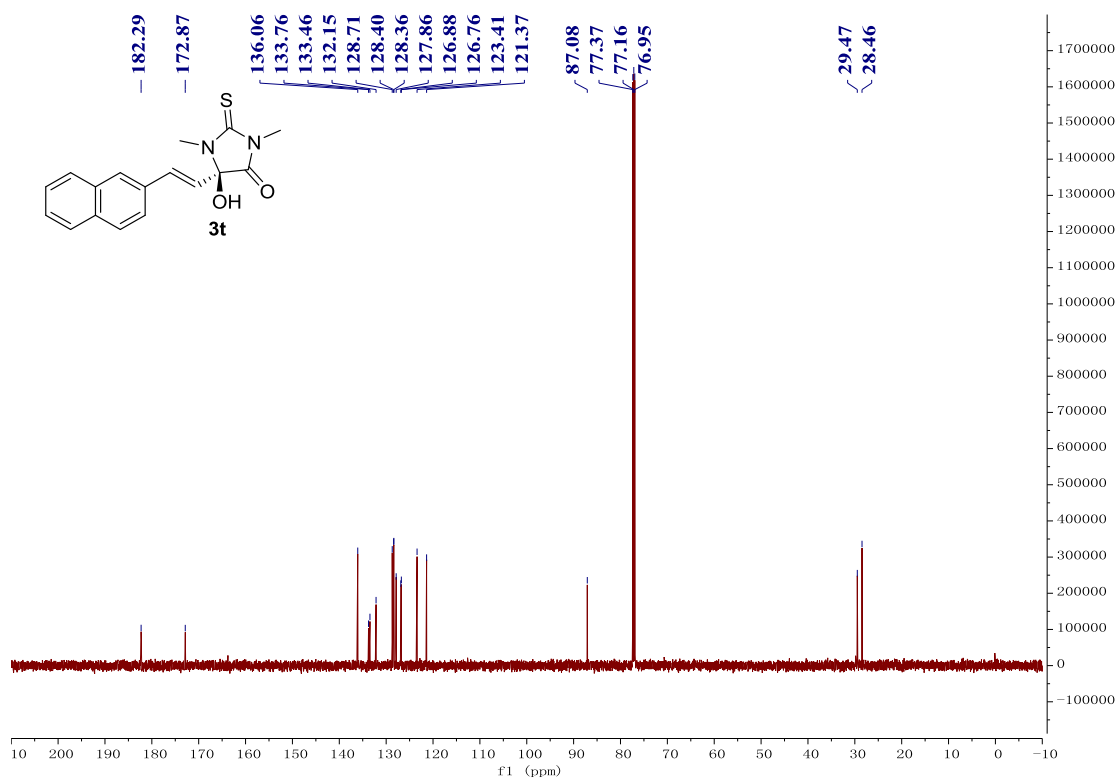

### <sup>1</sup>H NMR for 4a

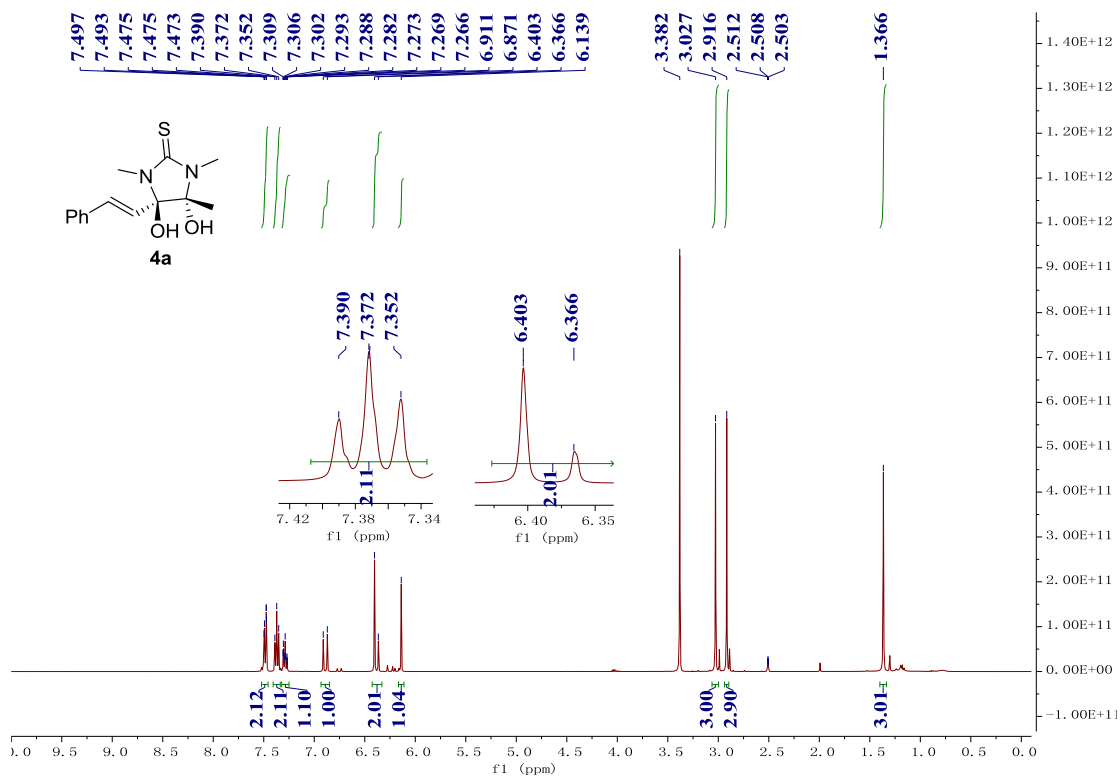

### <sup>13</sup>C NMR for 4a

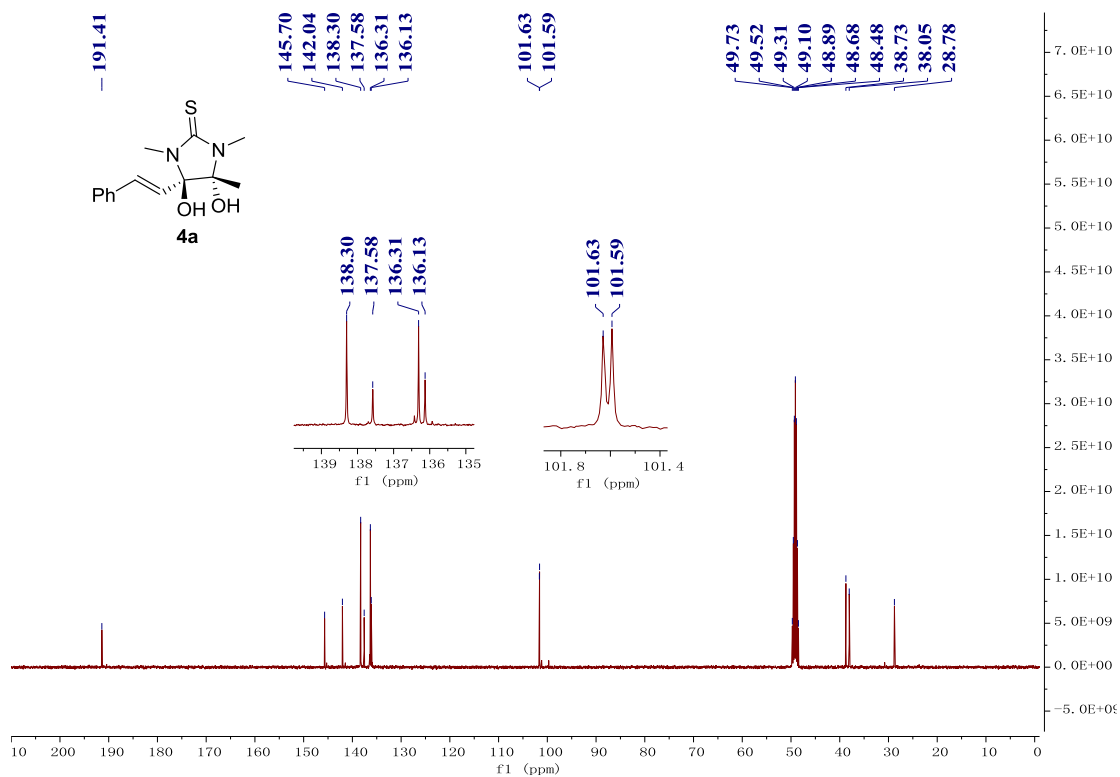

### <sup>1</sup>H NMR for 5a

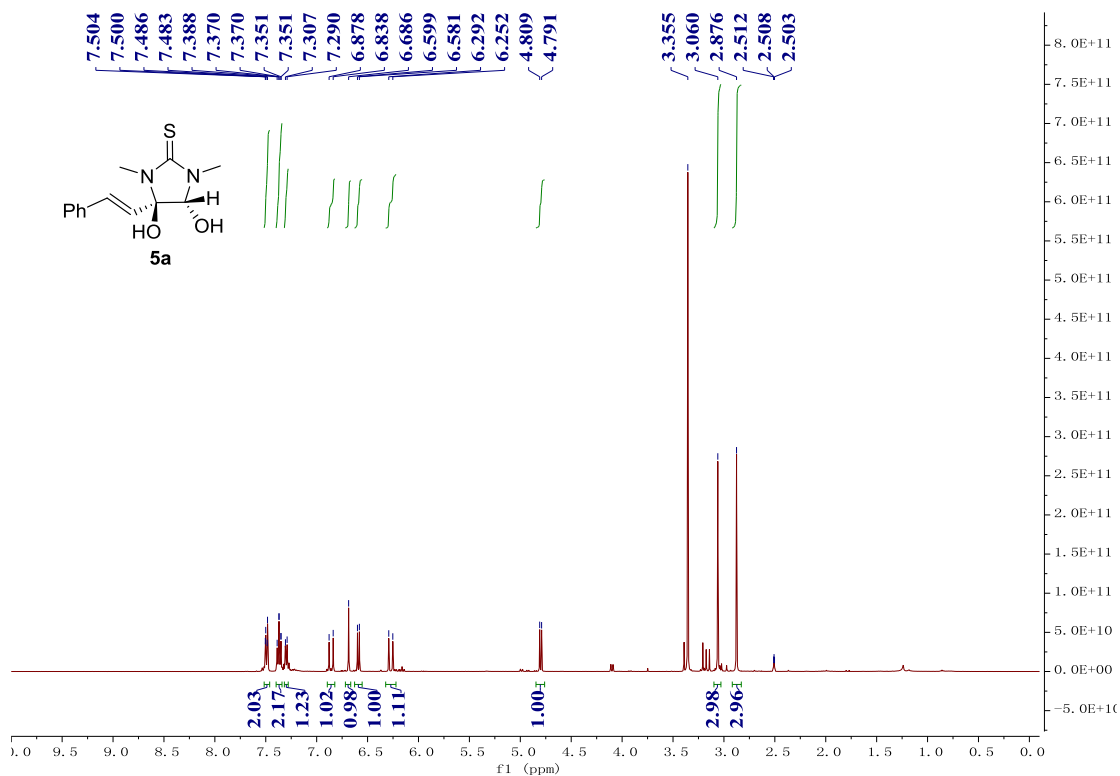

### <sup>13</sup>C NMR for 5a

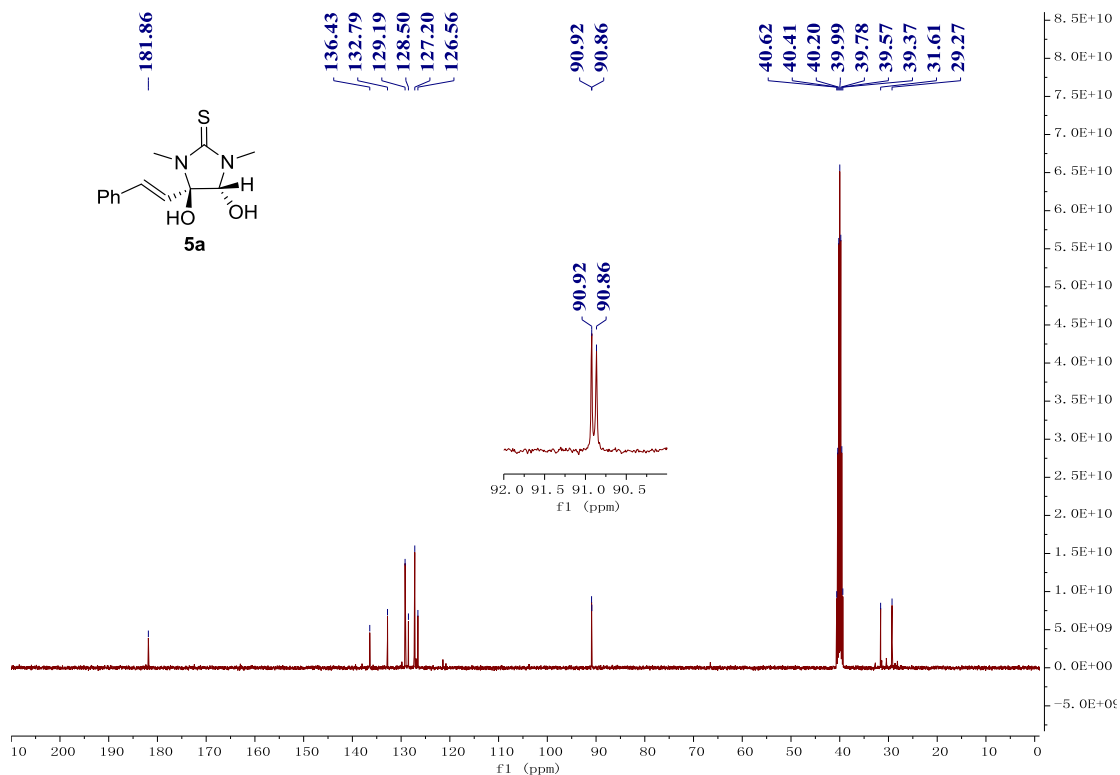

### <sup>1</sup>H NMR for 6a

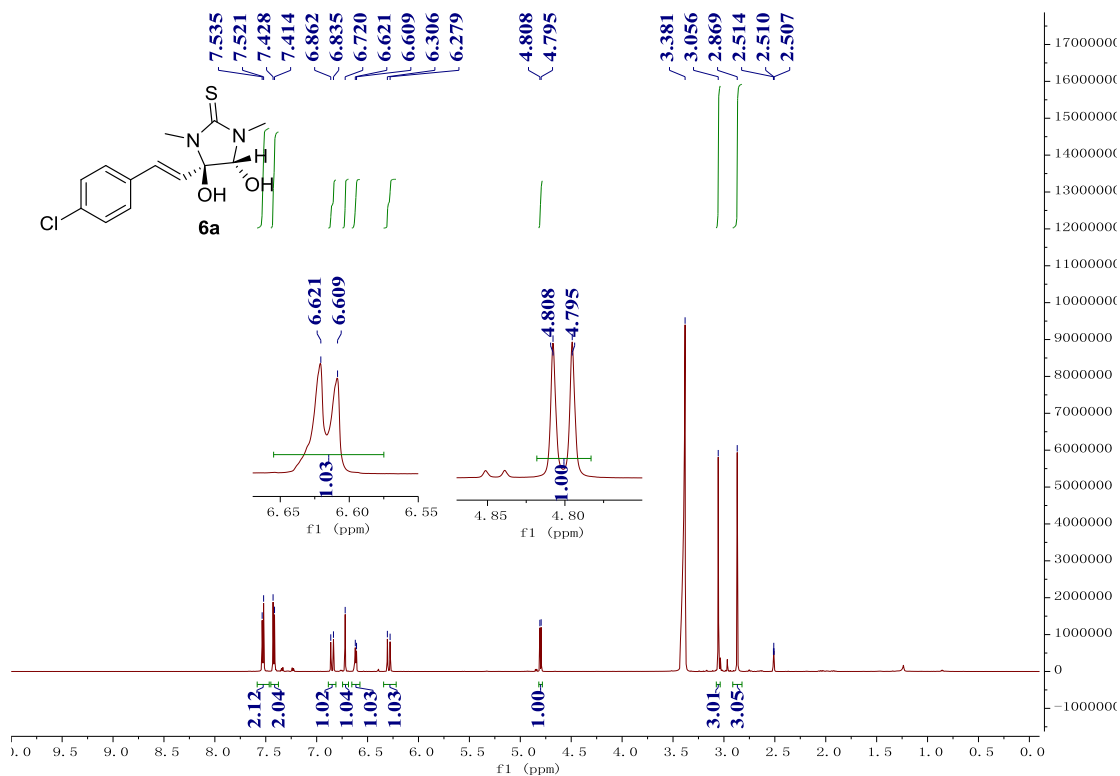

### <sup>13</sup>C NMR for 6a

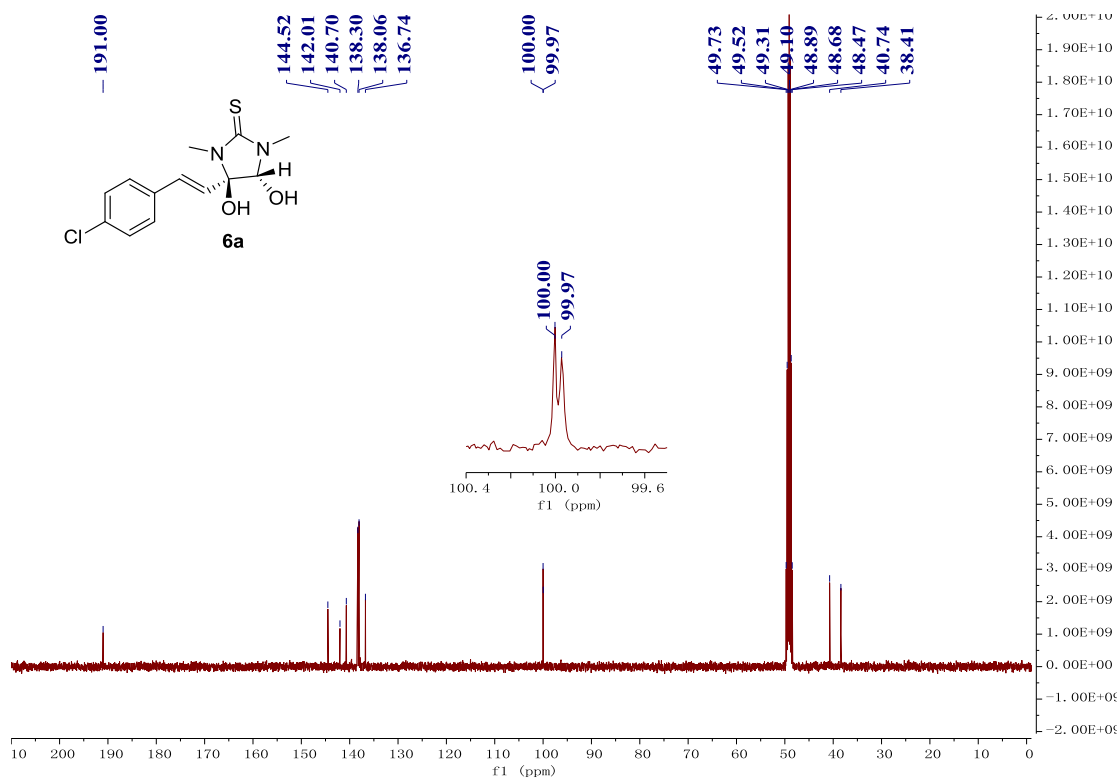

**<sup>1</sup>H NMR for 7a**

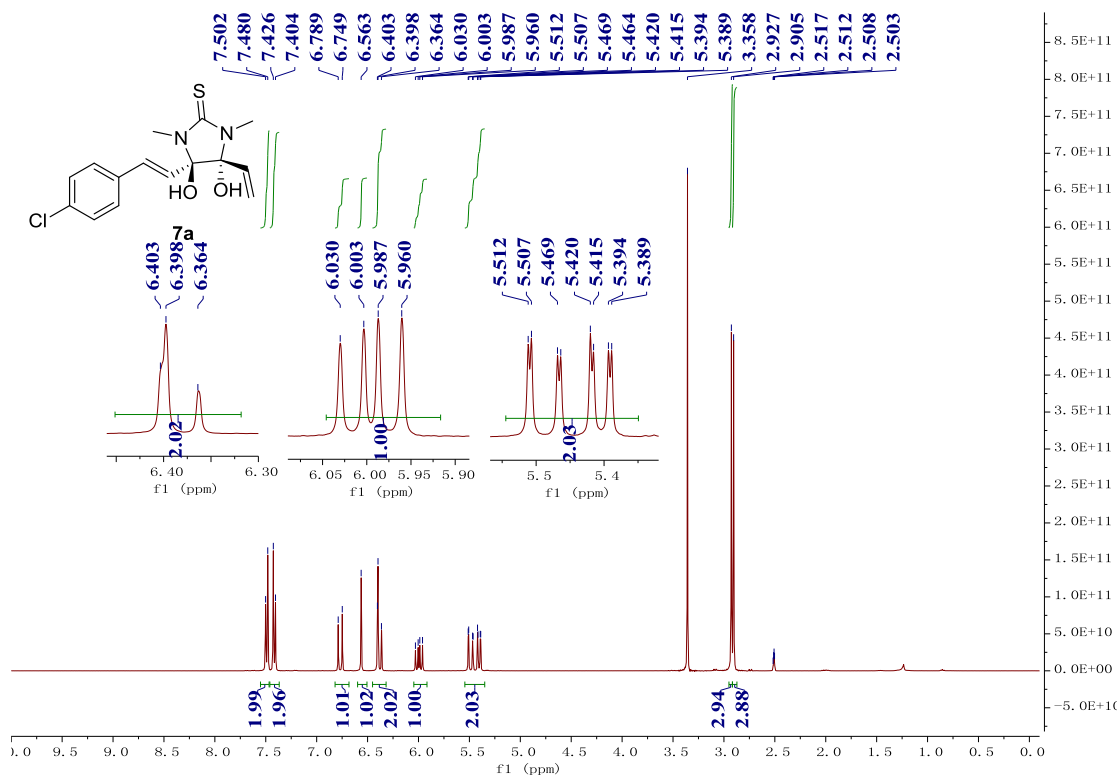

**<sup>13</sup>C NMR for 7a**

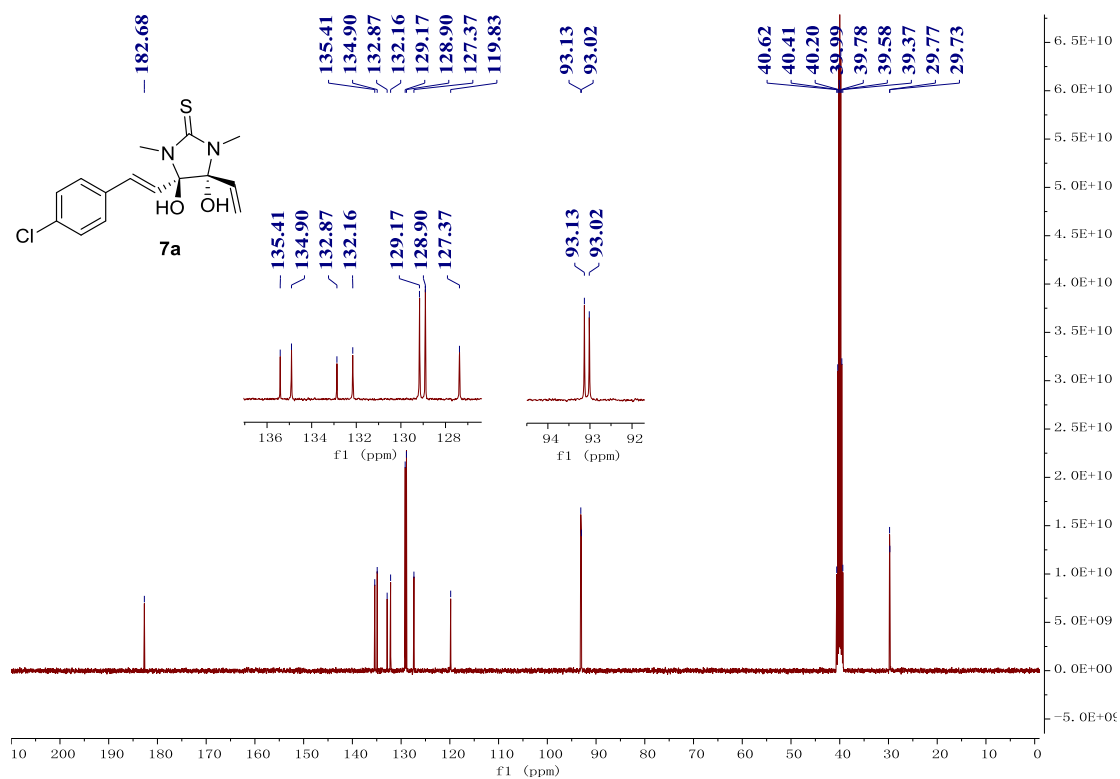



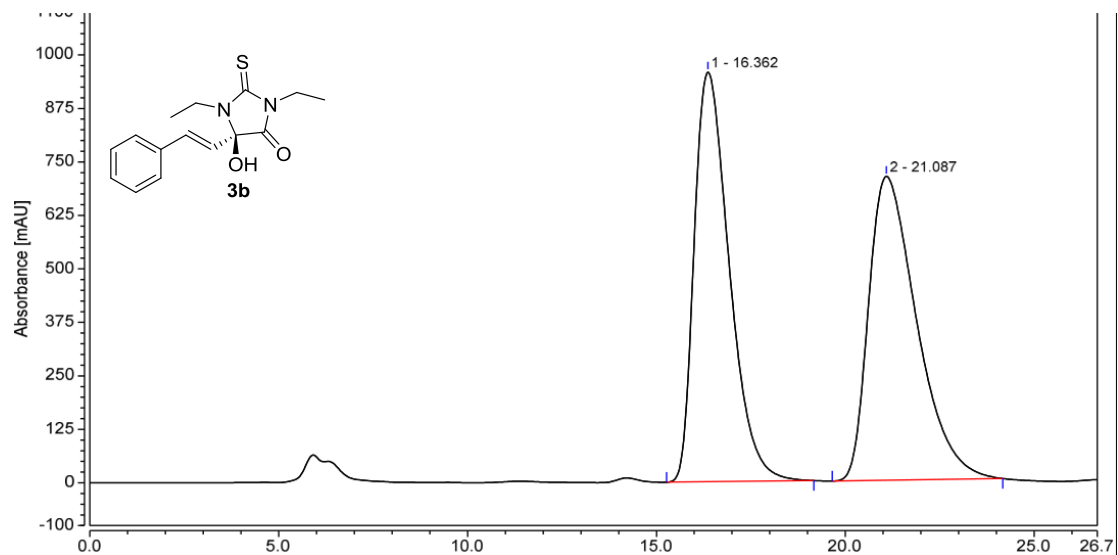

| Entry         | Retention Time min | Area mAU*min    | Height mAU      | Area %        | Height %      |
|---------------|--------------------|-----------------|-----------------|---------------|---------------|
| 1             | 16.362             | 1028.525        | 957.887         | 49.57         | 57.41         |
| 2             | 21.087             | 1046.509        | 710.637         | 50.43         | 42.59         |
| <b>Total:</b> |                    | <b>2075.035</b> | <b>1668.524</b> | <b>100.00</b> | <b>100.00</b> |

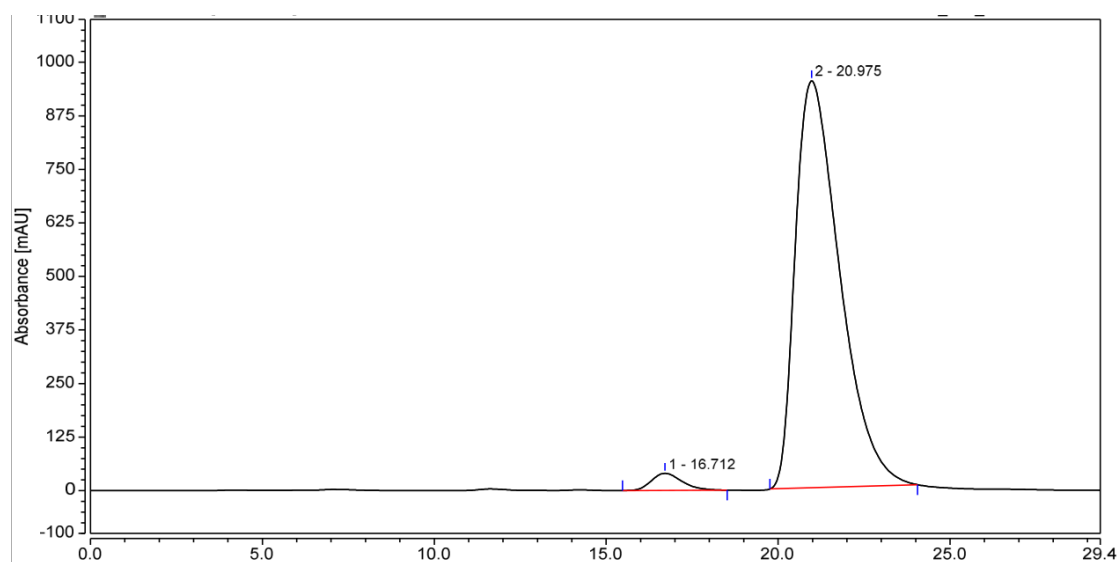

| Entry         | Retention Time min | Area mAU*min    | Height mAU     | Area %        | Height %      |
|---------------|--------------------|-----------------|----------------|---------------|---------------|
| 1             | 16.712             | 41.030          | 39.903         | 2.80          | 4.03          |
| 2             | 20.975             | 1423.922        | 950.177        | 97.20         | 95.97         |
| <b>Total:</b> |                    | <b>1464.952</b> | <b>990.080</b> | <b>100.00</b> | <b>100.00</b> |



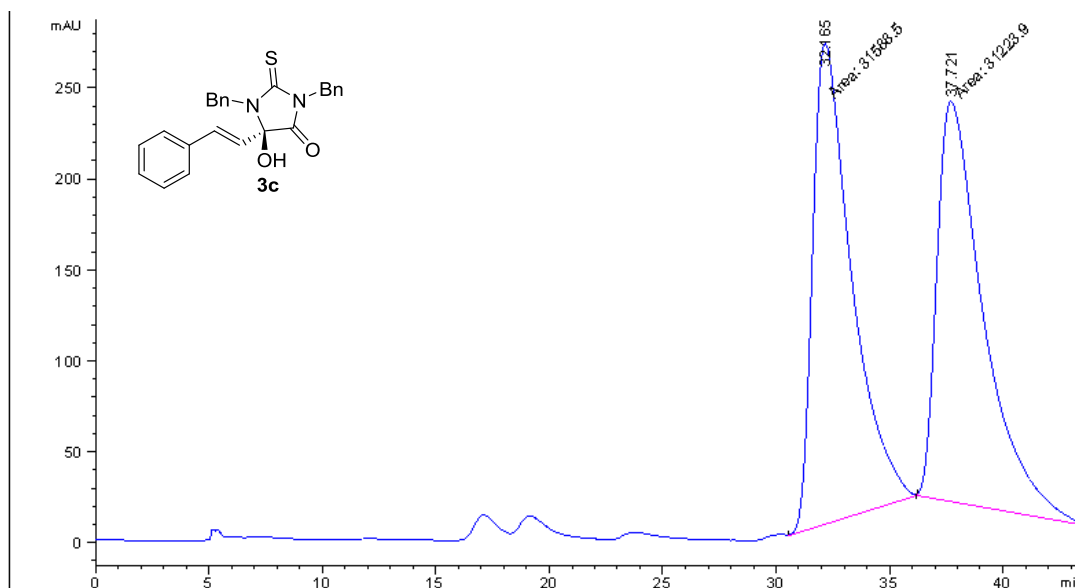

| Peak # | RetTime [min] | Type | Width [min] | Area [mAU*s] | Height [mAU] | Area %  |
|--------|---------------|------|-------------|--------------|--------------|---------|
| 1      | 32.165        | MM   | 1.9939      | 3.15885e4    | 264.04755    | 50.2902 |
| 2      | 37.721        | MM   | 2.3666      | 3.12239e4    | 219.89545    | 49.7098 |

Totals : 6.28124e4 483.94299

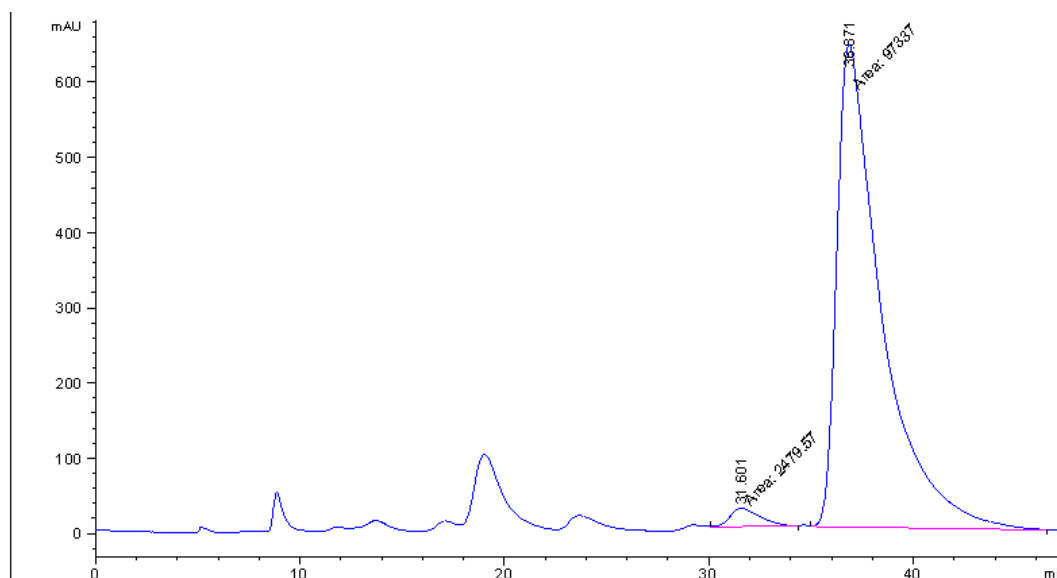

| Peak # | RetTime [min] | Type | Width [min] | Area [mAU*s] | Height [mAU] | Area %  |
|--------|---------------|------|-------------|--------------|--------------|---------|
| 1      | 31.601        | MM   | 1.6996      | 2479.57471   | 24.31470     | 2.4841  |
| 2      | 36.871        | MM   | 2.5263      | 9.73370e4    | 642.15143    | 97.5159 |

Totals : 9.98166e4 666.46613

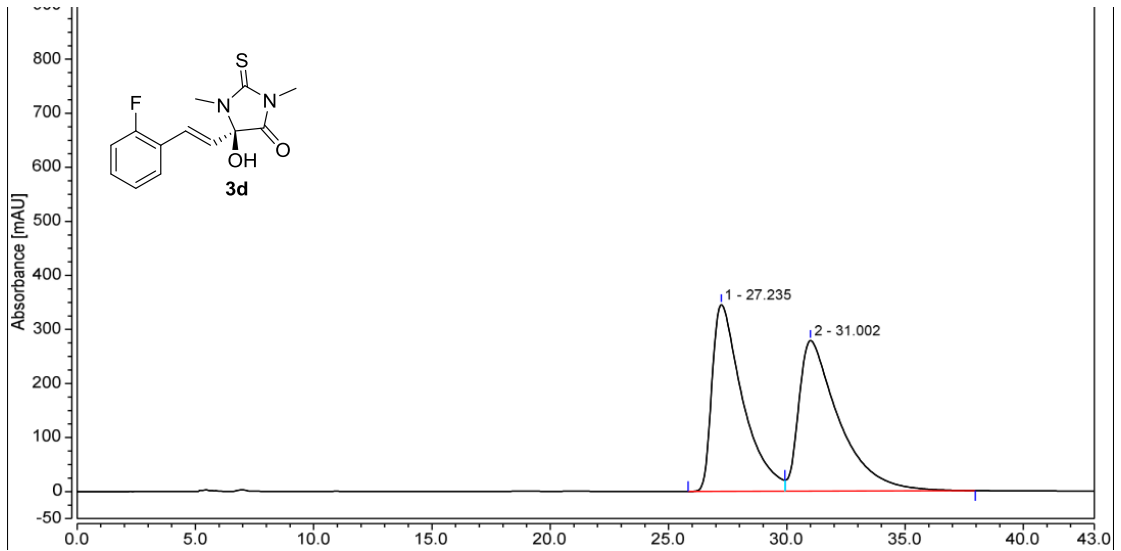

| Peak          | Retention Time min | Area mAU*min    | Height mAU     | Area %        | Height %      |
|---------------|--------------------|-----------------|----------------|---------------|---------------|
| 1             | 27.235             | 517.976         | 345.636        | 48.61         | 55.36         |
| 2             | 31.002             | 547.649         | 278.755        | 51.39         | 44.64         |
| <b>Total:</b> |                    | <b>1065.624</b> | <b>624.391</b> | <b>100.00</b> | <b>100.00</b> |

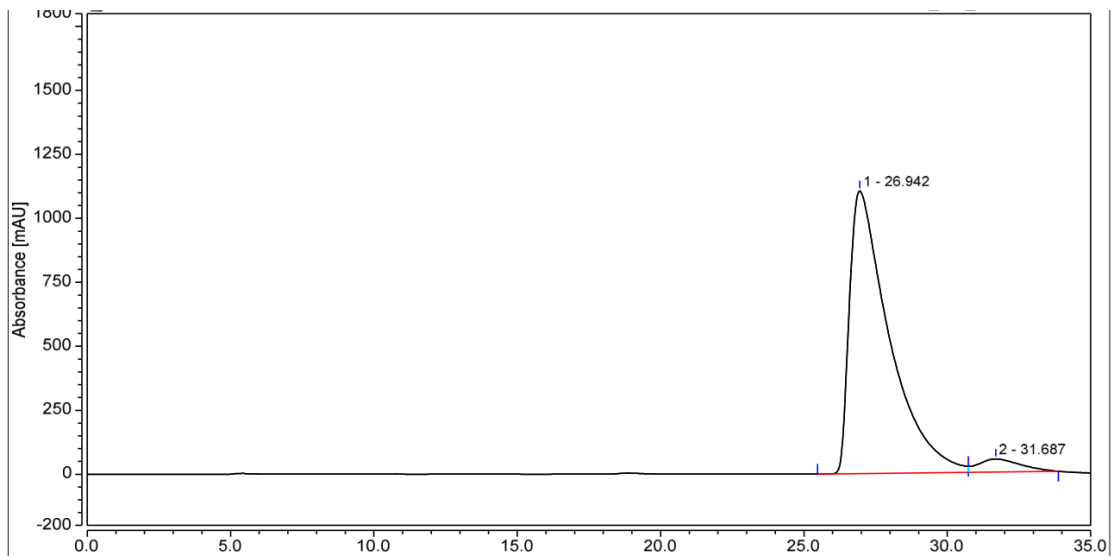

| Peak          | Retention Time min | Area mAU*min    | Height mAU      | Area %        | Height %      |
|---------------|--------------------|-----------------|-----------------|---------------|---------------|
| 1             | 26.942             | 1775.029        | 1105.184        | 95.34         | 95.60         |
| 2             | 31.687             | 86.850          | 50.889          | 4.66          | 4.40          |
| <b>Total:</b> |                    | <b>1861.878</b> | <b>1156.073</b> | <b>100.00</b> | <b>100.00</b> |

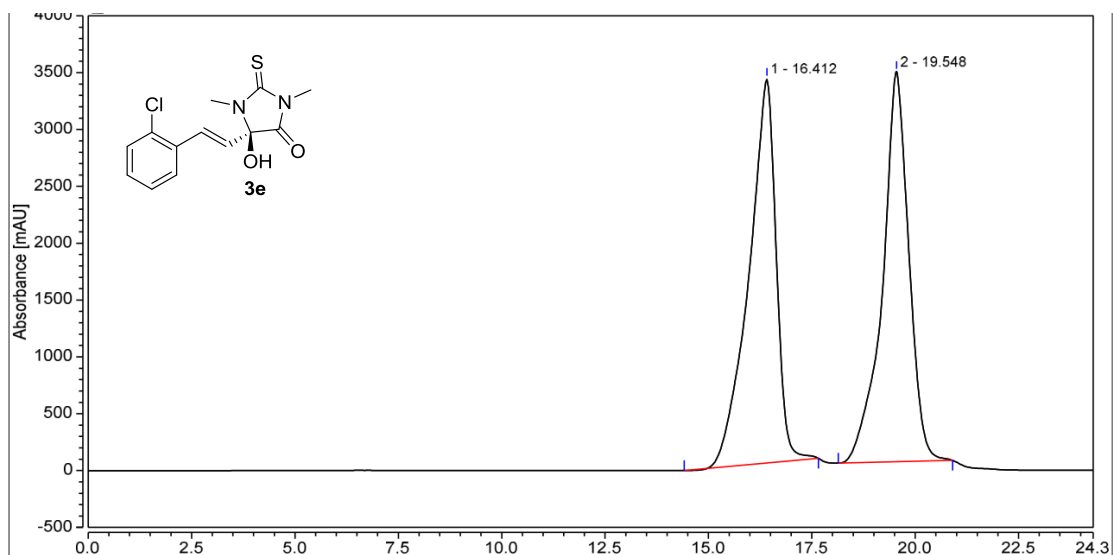

| Peak          | Retention Time min | Area mAU*min    | Height mAU      | Area %        | Height %      |
|---------------|--------------------|-----------------|-----------------|---------------|---------------|
| 1             | 16.412             | 2579.205        | 3384.141        | 50.50         | 49.64         |
| 2             | 19.548             | 2528.068        | 3433.611        | 49.50         | 50.36         |
| <b>Total:</b> |                    | <b>5107.273</b> | <b>6817.752</b> | <b>100.00</b> | <b>100.00</b> |

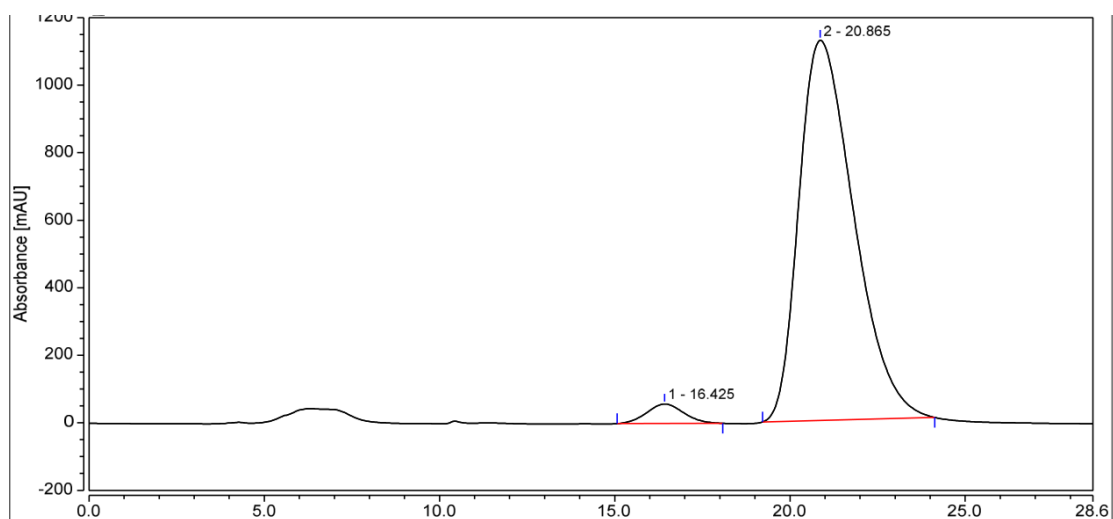

| Peak          | Retention Time min | Area mAU*min    | Height mAU      | Area %        | Height %      |
|---------------|--------------------|-----------------|-----------------|---------------|---------------|
| 1             | 16.425             | 70.604          | 57.738          | 3.34          | 4.88          |
| 2             | 20.865             | 2044.596        | 1126.038        | 96.66         | 95.12         |
| <b>Total:</b> |                    | <b>2115.200</b> | <b>1183.776</b> | <b>100.00</b> | <b>100.00</b> |

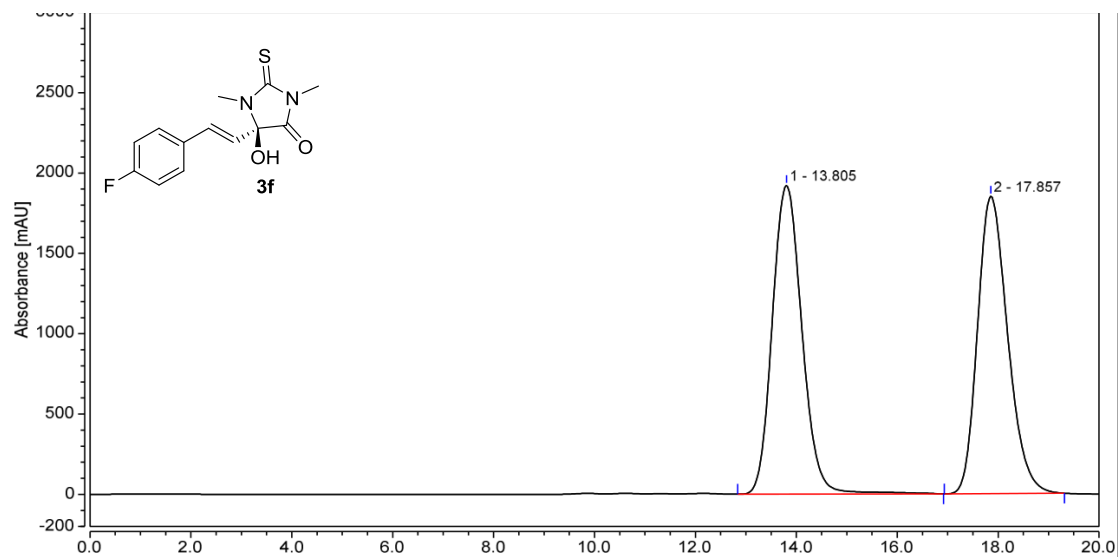

| Peak          | Retention Time min | Area mAU*min    | Height mAU      | Area %        | Height %      |
|---------------|--------------------|-----------------|-----------------|---------------|---------------|
| 1             | 13.805             | 1313.670        | 1921.410        | 50.62         | 50.93         |
| 2             | 17.857             | 1281.575        | 1851.389        | 49.38         | 49.07         |
| <b>Total:</b> |                    | <b>2595.245</b> | <b>3772.799</b> | <b>100.00</b> | <b>100.00</b> |

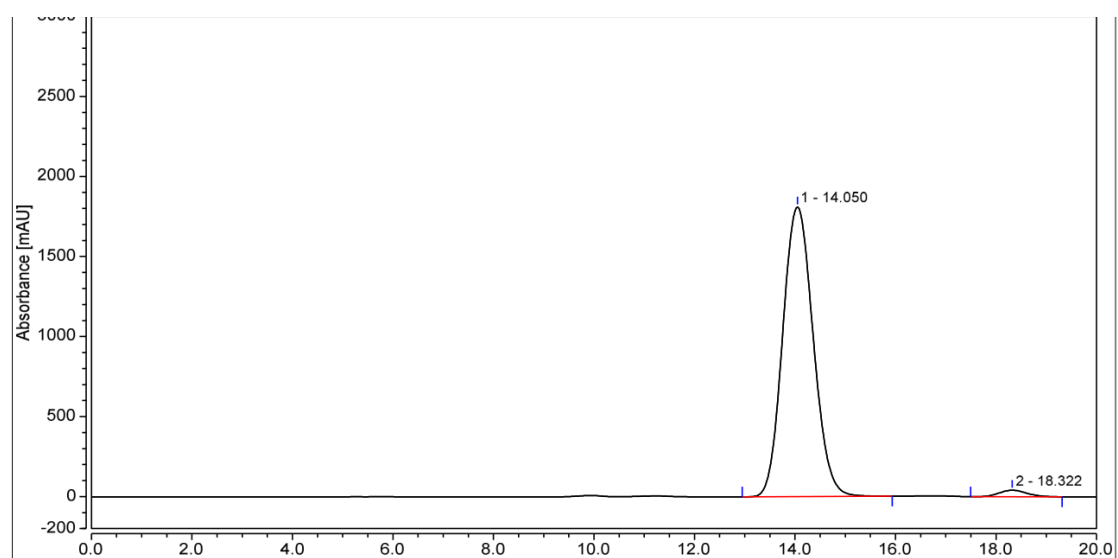

| Peak          | Retention Time min | Area mAU*min    | Height mAU      | Area %        | Height %      |
|---------------|--------------------|-----------------|-----------------|---------------|---------------|
| 1             | 14.050             | 1270.542        | 1809.550        | 97.93         | 97.77         |
| 2             | 18.322             | 26.896          | 41.320          | 2.07          | 2.23          |
| <b>Total:</b> |                    | <b>1297.438</b> | <b>1850.869</b> | <b>100.00</b> | <b>100.00</b> |

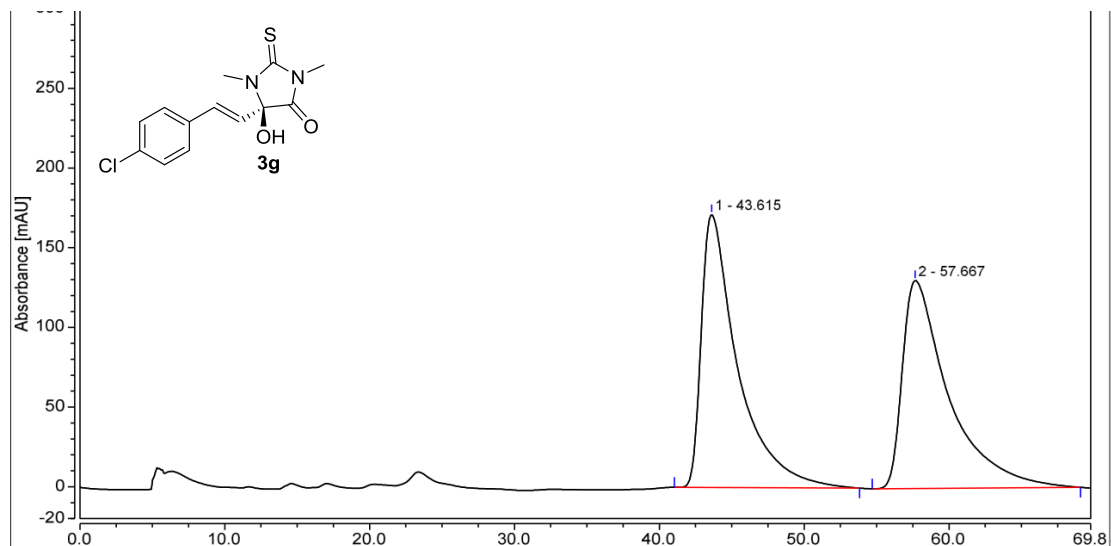

| Peak          | Retention Time min | Area mAU*min   | Height mAU     | Area %        | Height %      |
|---------------|--------------------|----------------|----------------|---------------|---------------|
| 1             | 43.615             | 497.907        | 171.189        | 50.84         | 56.75         |
| 2             | 57.667             | 481.476        | 130.474        | 49.16         | 43.25         |
| <b>Total:</b> |                    | <b>979.384</b> | <b>301.663</b> | <b>100.00</b> | <b>100.00</b> |

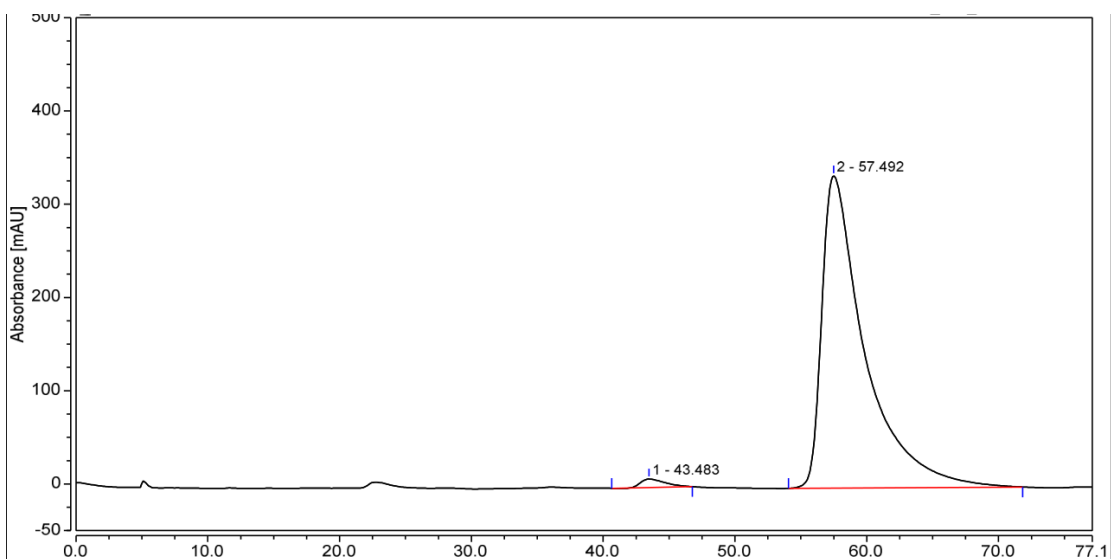

| Peak          | Retention Time min | Area mAU*min    | Height mAU     | Area %        | Height %      |
|---------------|--------------------|-----------------|----------------|---------------|---------------|
| 1             | 43.483             | 19.293          | 9.108          | 1.51          | 2.65          |
| 2             | 57.492             | 1261.999        | 334.838        | 98.49         | 97.35         |
| <b>Total:</b> |                    | <b>1281.292</b> | <b>343.946</b> | <b>100.00</b> | <b>100.00</b> |

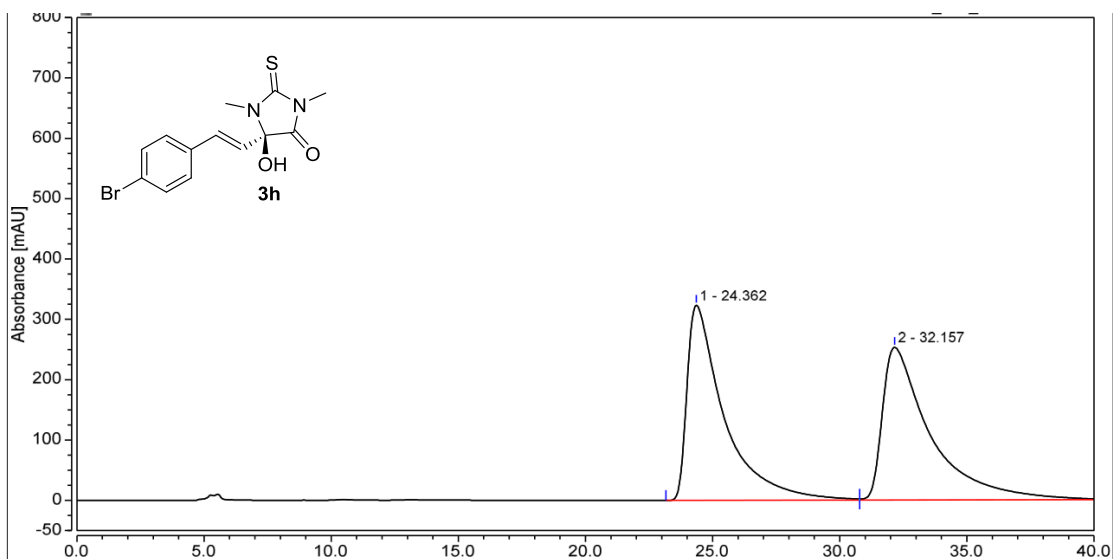

| Peak          | Retention Time min | Area mAU*min    | Height mAU     | Area %        | Height %      |
|---------------|--------------------|-----------------|----------------|---------------|---------------|
| 1             | 24.362             | 547.272         | 323.326        | 49.71         | 56.10         |
| 2             | 32.157             | 553.573         | 253.029        | 50.29         | 43.90         |
| <b>Total:</b> |                    | <b>1100.846</b> | <b>576.355</b> | <b>100.00</b> | <b>100.00</b> |

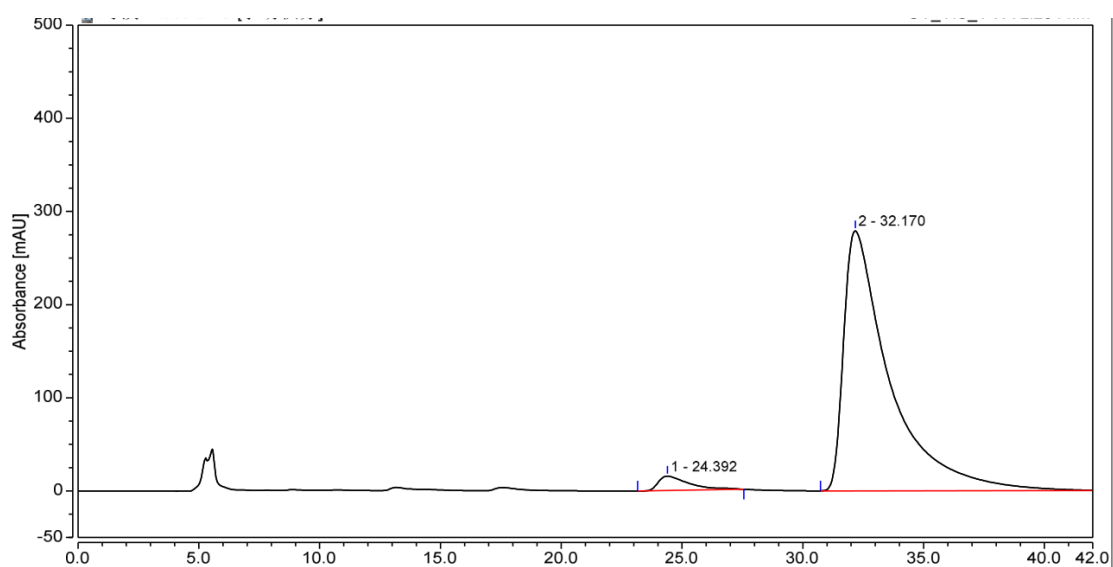

| Peak          | Retention Time min | Area mAU*min   | Height mAU     | Area %        | Height %      |
|---------------|--------------------|----------------|----------------|---------------|---------------|
| 1             | 24.392             | 22.573         | 15.420         | 3.53          | 5.23          |
| 2             | 32.170             | 616.088        | 279.276        | 96.47         | 94.77         |
| <b>Total:</b> |                    | <b>638.660</b> | <b>294.696</b> | <b>100.00</b> | <b>100.00</b> |

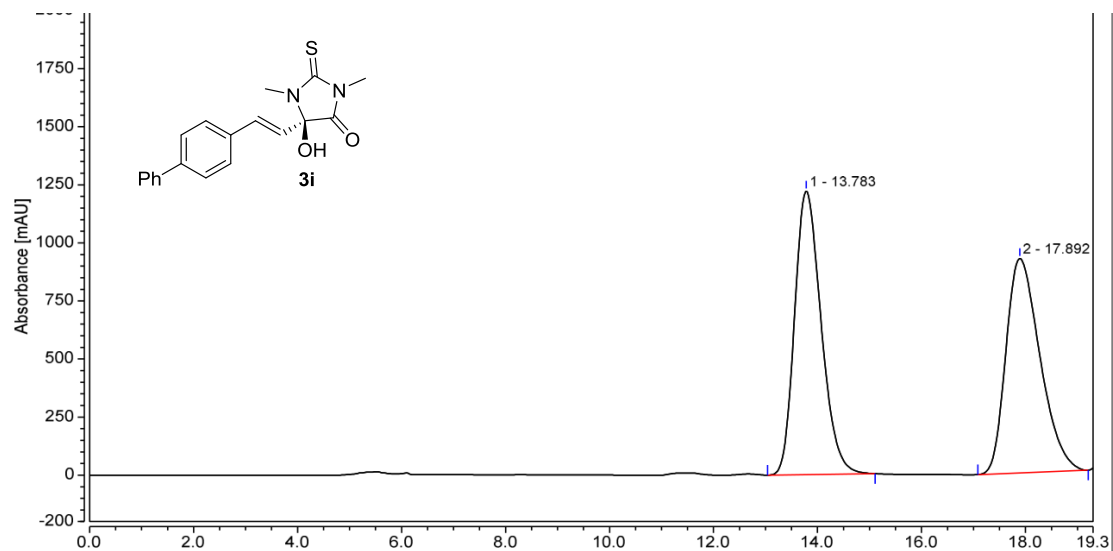

| Peak          | Retention Time min | Area mAU*min    | Height mAU      | Area %        | Height %      |
|---------------|--------------------|-----------------|-----------------|---------------|---------------|
| 1             | 13.783             | 721.572         | 1221.429        | 50.77         | 56.94         |
| 2             | 17.892             | 699.727         | 923.687         | 49.23         | 43.06         |
| <b>Total:</b> |                    | <b>1421.299</b> | <b>2145.116</b> | <b>100.00</b> | <b>100.00</b> |

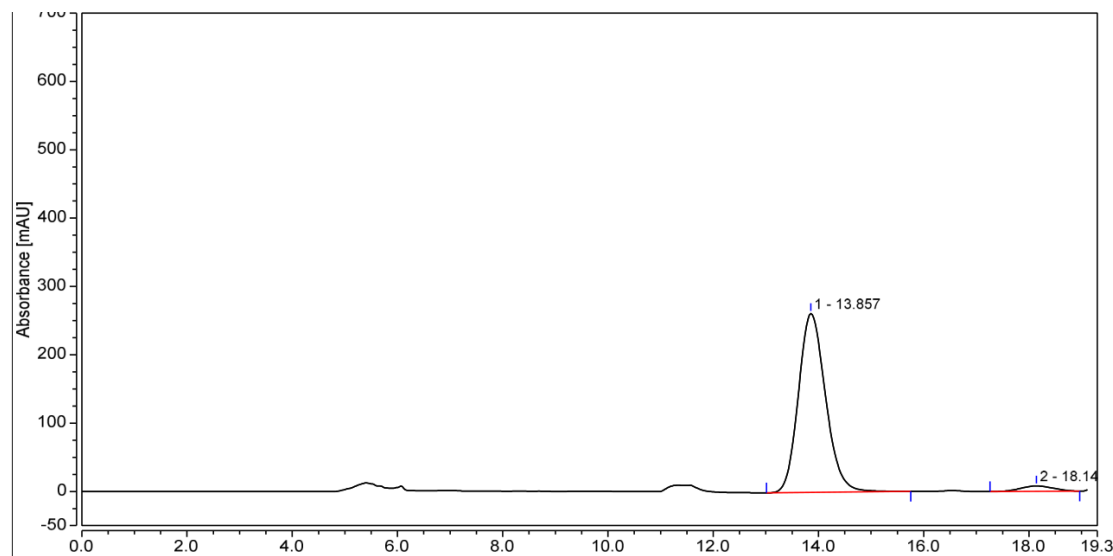

| Peak          | Retention Time min | Area mAU*min   | Height mAU     | Area %        | Height %      |
|---------------|--------------------|----------------|----------------|---------------|---------------|
| 1             | 13.857             | 156.621        | 261.743        | 96.44         | 97.05         |
| 2             | 18.140             | 5.787          | 7.969          | 3.56          | 2.95          |
| <b>Total:</b> |                    | <b>162.408</b> | <b>269.712</b> | <b>100.00</b> | <b>100.00</b> |

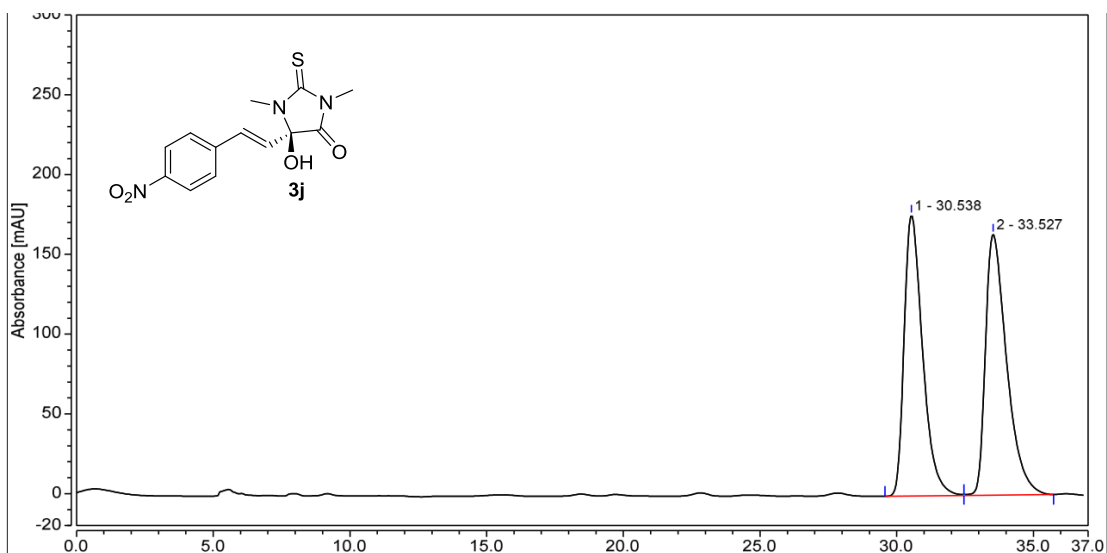

| Peak          | Retention Time min | Area mAU*min   | Height mAU     | Area %        | Height %      |
|---------------|--------------------|----------------|----------------|---------------|---------------|
| 1             | 30.538             | 137.914        | 176.122        | 48.46         | 51.84         |
| 2             | 33.527             | 146.699        | 163.598        | 51.54         | 48.16         |
| <b>Total:</b> |                    | <b>284.612</b> | <b>339.720</b> | <b>100.00</b> | <b>100.00</b> |

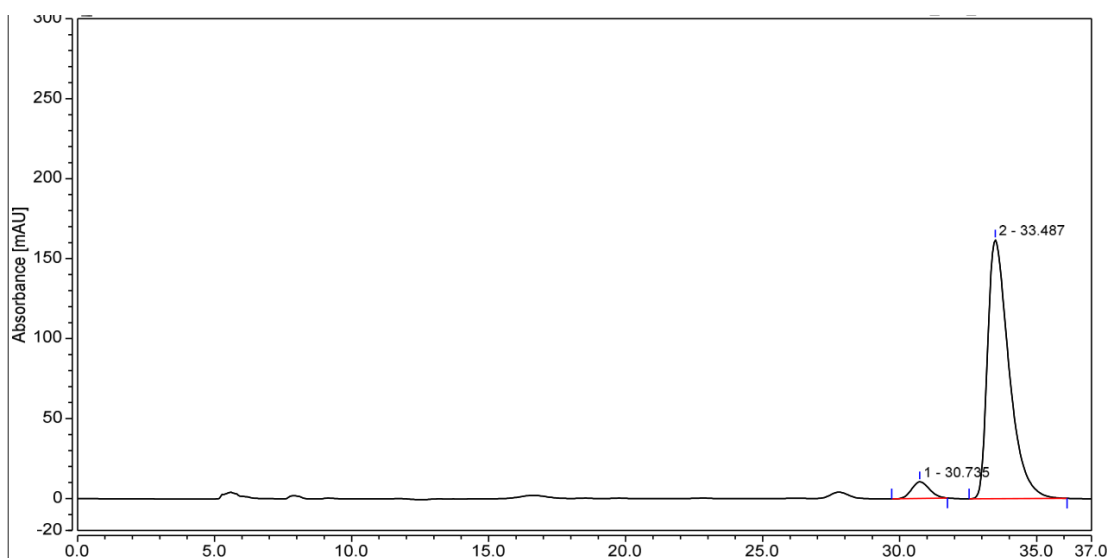

| Peak          | Retention Time min | Area mAU*min   | Height mAU     | Area %        | Height %      |
|---------------|--------------------|----------------|----------------|---------------|---------------|
| 1             | 30.735             | 7.810          | 10.373         | 5.07          | 6.02          |
| 2             | 33.487             | 146.323        | 161.801        | 94.93         | 93.98         |
| <b>Total:</b> |                    | <b>154.133</b> | <b>172.175</b> | <b>100.00</b> | <b>100.00</b> |



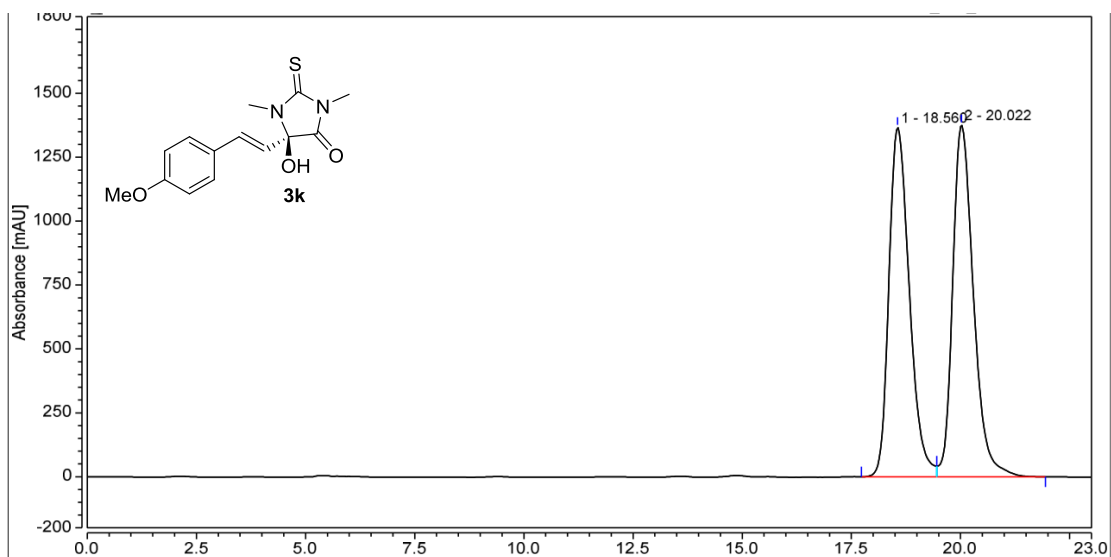

| Peak          | Retention Time<br>min | Area<br>mAU*min | Height<br>mAU   | Area<br>%     | Height<br>%   |
|---------------|-----------------------|-----------------|-----------------|---------------|---------------|
| 1             | 18.560                | 741.826         | 1367.002        | 49.38         | 49.81         |
| 2             | 20.022                | 760.366         | 1377.468        | 50.62         | 50.19         |
| <b>Total:</b> |                       | <b>1502.192</b> | <b>2744.470</b> | <b>100.00</b> | <b>100.00</b> |

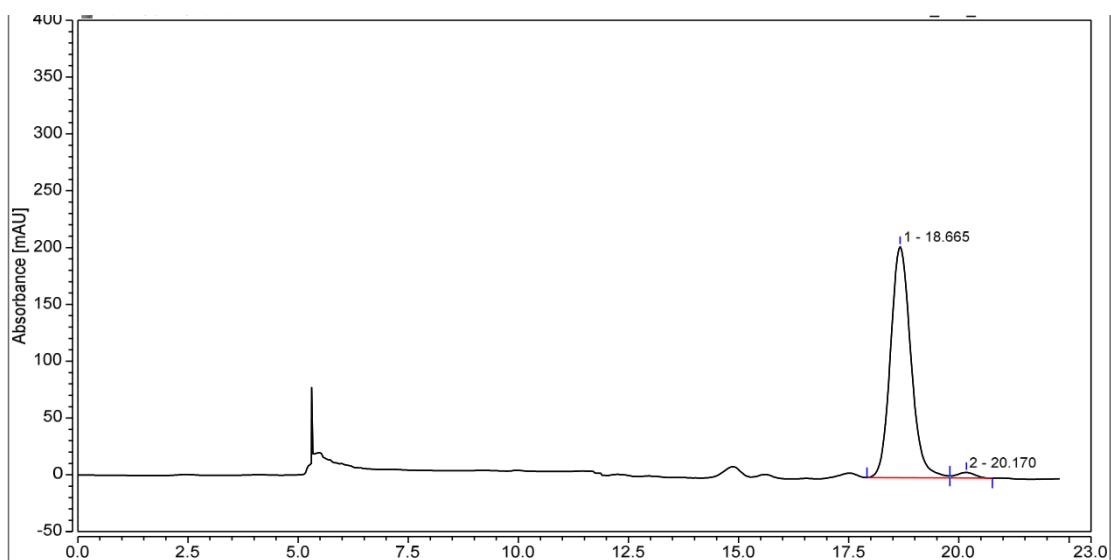

| Peak          | Retention Time<br>min | Area<br>mAU*min | Height<br>mAU  | Area<br>%     | Height<br>%   |
|---------------|-----------------------|-----------------|----------------|---------------|---------------|
| 1             | 18.665                | 109.032         | 203.452        | 97.89         | 97.66         |
| 2             | 20.170                | 2.345           | 4.867          | 2.11          | 2.34          |
| <b>Total:</b> |                       | <b>111.377</b>  | <b>208.320</b> | <b>100.00</b> | <b>100.00</b> |

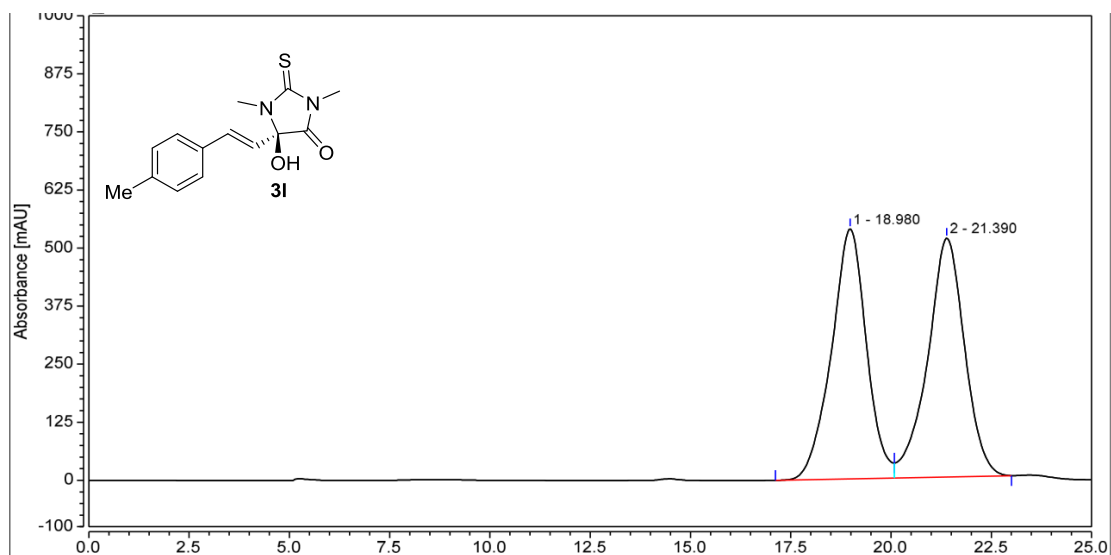

| Peak          | Retention Time<br>min | Area<br>mAU*min | Height<br>mAU   | Area<br>%     | Height<br>%   |
|---------------|-----------------------|-----------------|-----------------|---------------|---------------|
| 1             | 18.980                | 543.955         | 538.390         | 49.79         | 51.14         |
| 2             | 21.390                | 548.451         | 514.309         | 50.21         | 48.86         |
| <b>Total:</b> |                       | <b>1092.406</b> | <b>1052.699</b> | <b>100.00</b> | <b>100.00</b> |

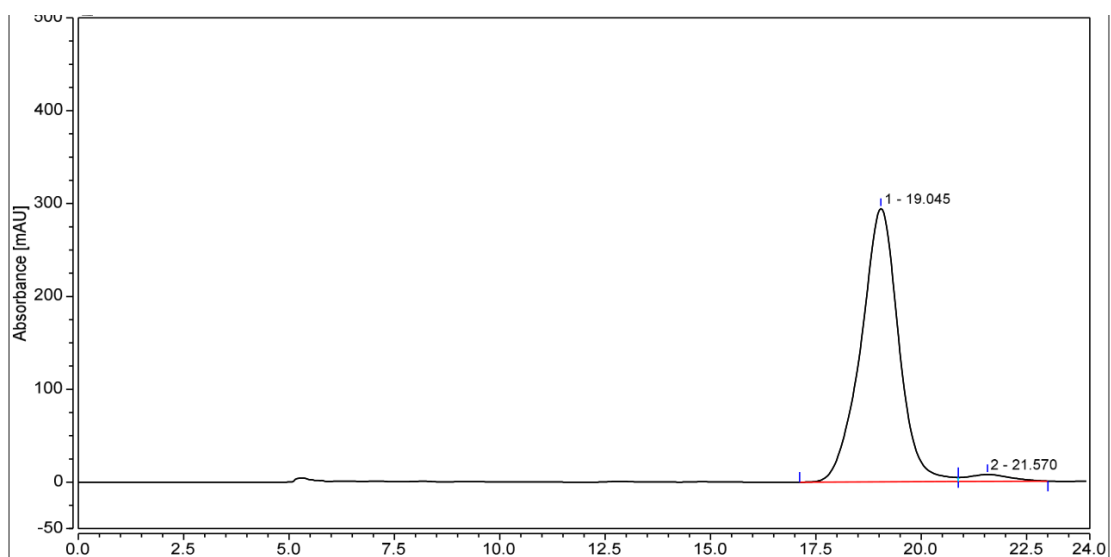

| Peak          | Retention Time<br>min | Area<br>mAU*min | Height<br>mAU  | Area<br>%     | Height<br>%   |
|---------------|-----------------------|-----------------|----------------|---------------|---------------|
| 1             | 19.045                | 304.305         | 294.306        | 97.23         | 97.56         |
| 2             | 21.570                | 8.668           | 7.361          | 2.77          | 2.44          |
| <b>Total:</b> |                       | <b>312.973</b>  | <b>301.667</b> | <b>100.00</b> | <b>100.00</b> |

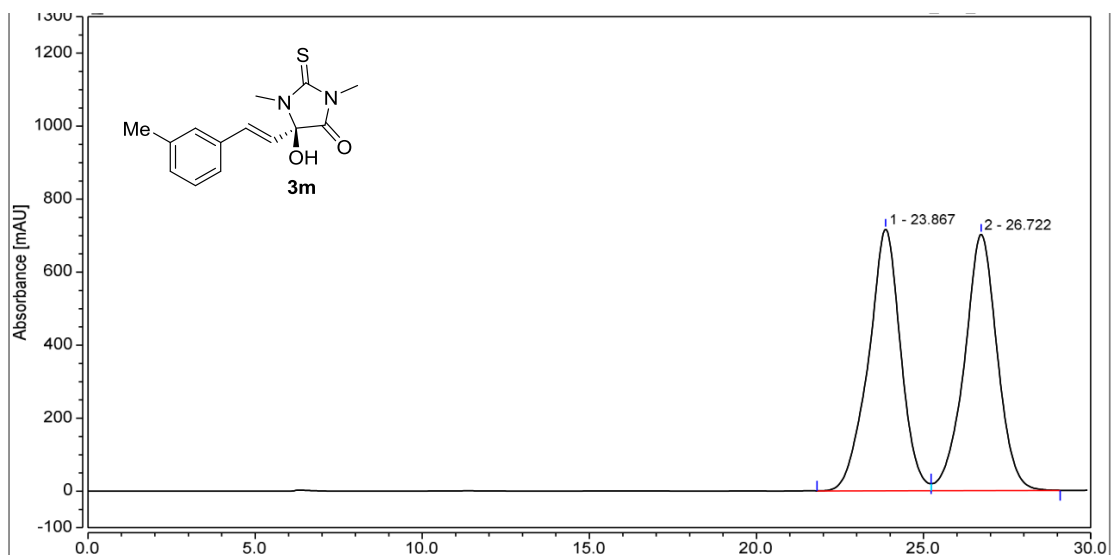

| Peak          | Retention Time min | Area mAU*min    | Height mAU      | Area %        | Height %      |
|---------------|--------------------|-----------------|-----------------|---------------|---------------|
| 1             | 23.867             | 799.553         | 716.493         | 50.07         | 50.52         |
| 2             | 26.722             | 797.356         | 701.787         | 49.93         | 49.48         |
| <b>Total:</b> |                    | <b>1596.909</b> | <b>1418.281</b> | <b>100.00</b> | <b>100.00</b> |

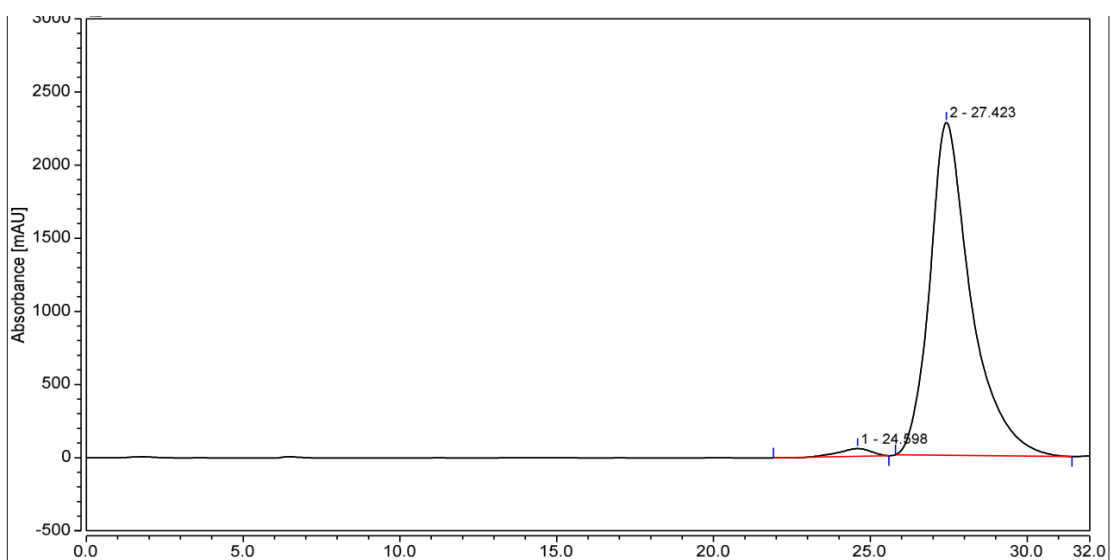

| Peak          | Retention Time min | Area mAU*min    | Height mAU      | Area %        | Height %      |
|---------------|--------------------|-----------------|-----------------|---------------|---------------|
| 1             | 24.598             | 62.932          | 52.377          | 1.78          | 2.25          |
| 2             | 27.423             | 3469.123        | 2276.011        | 98.22         | 97.75         |
| <b>Total:</b> |                    | <b>3532.056</b> | <b>2328.387</b> | <b>100.00</b> | <b>100.00</b> |

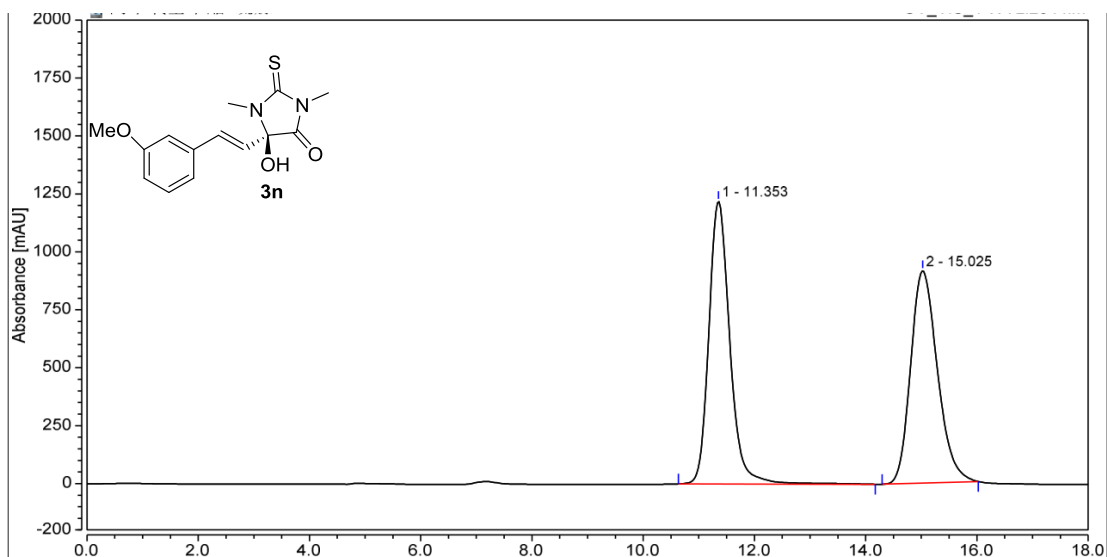

| Peak          | Retention Time<br>min | Area<br>mAU*min | Height<br>mAU   | Area<br>%     | Height<br>%   |
|---------------|-----------------------|-----------------|-----------------|---------------|---------------|
| 1             | 11.353                | 533.818         | 1220.256        | 51.11         | 57.11         |
| 2             | 15.025                | 510.565         | 916.236         | 48.89         | 42.89         |
| <b>Total:</b> |                       | <b>1044.383</b> | <b>2136.492</b> | <b>100.00</b> | <b>100.00</b> |

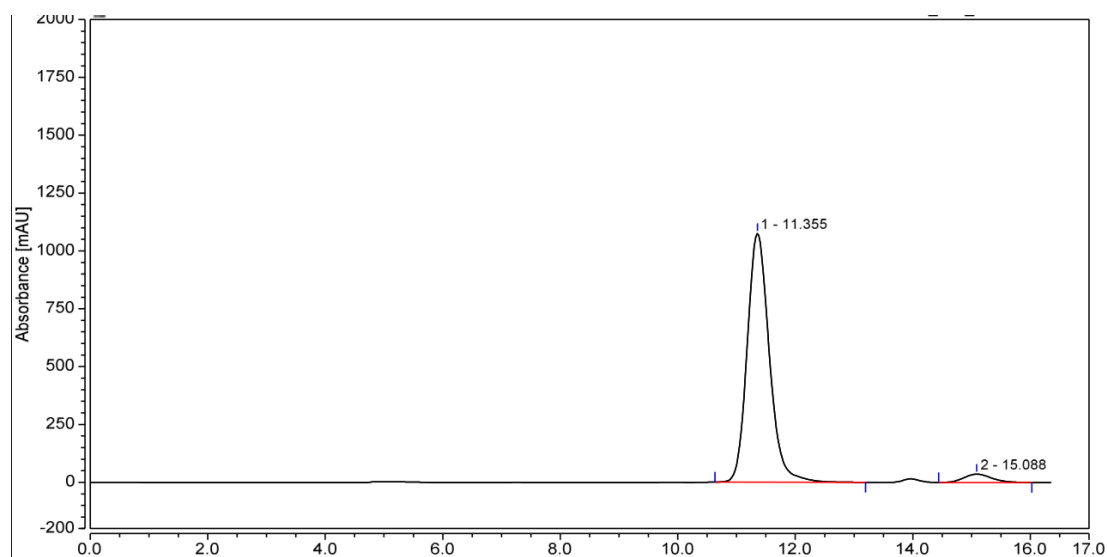

| Peak          | Retention Time<br>min | Area<br>mAU*min | Height<br>mAU   | Area<br>%     | Height<br>%   |
|---------------|-----------------------|-----------------|-----------------|---------------|---------------|
| 1             | 11.355                | 467.643         | 1074.785        | 95.91         | 96.77         |
| 2             | 15.088                | 19.928          | 35.907          | 4.09          | 3.23          |
| <b>Total:</b> |                       | <b>487.571</b>  | <b>1110.692</b> | <b>100.00</b> | <b>100.00</b> |

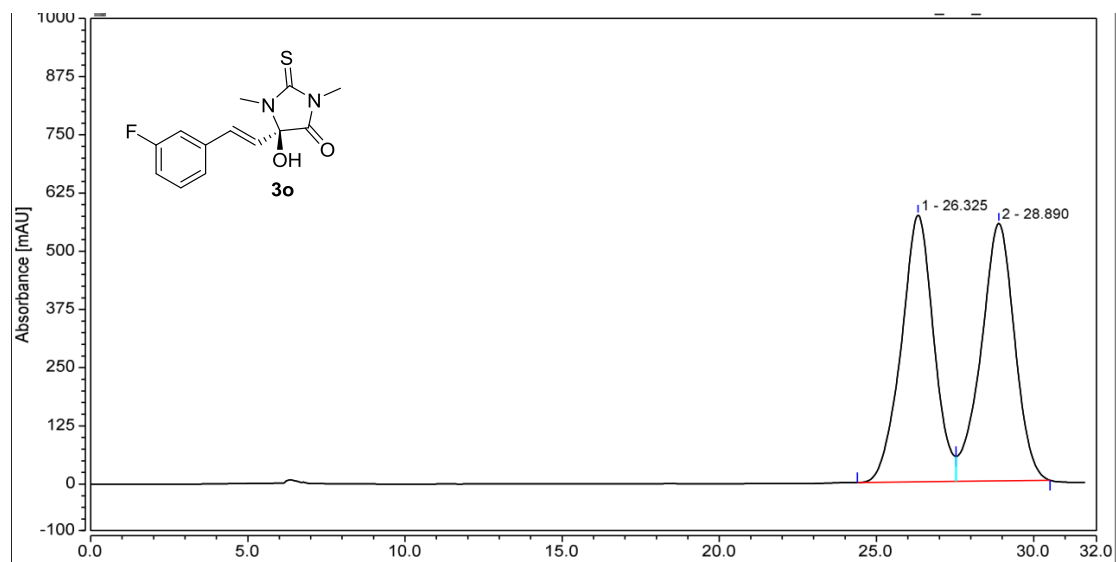

| Peak          | Retention Time min | Area mAU*min    | Height mAU      | Area %        | Height %      |
|---------------|--------------------|-----------------|-----------------|---------------|---------------|
| 1             | 26.325             | 682.549         | 573.021         | 49.98         | 50.88         |
| 2             | 28.890             | 683.156         | 553.248         | 50.02         | 49.12         |
| <b>Total:</b> |                    | <b>1365.704</b> | <b>1126.269</b> | <b>100.00</b> | <b>100.00</b> |

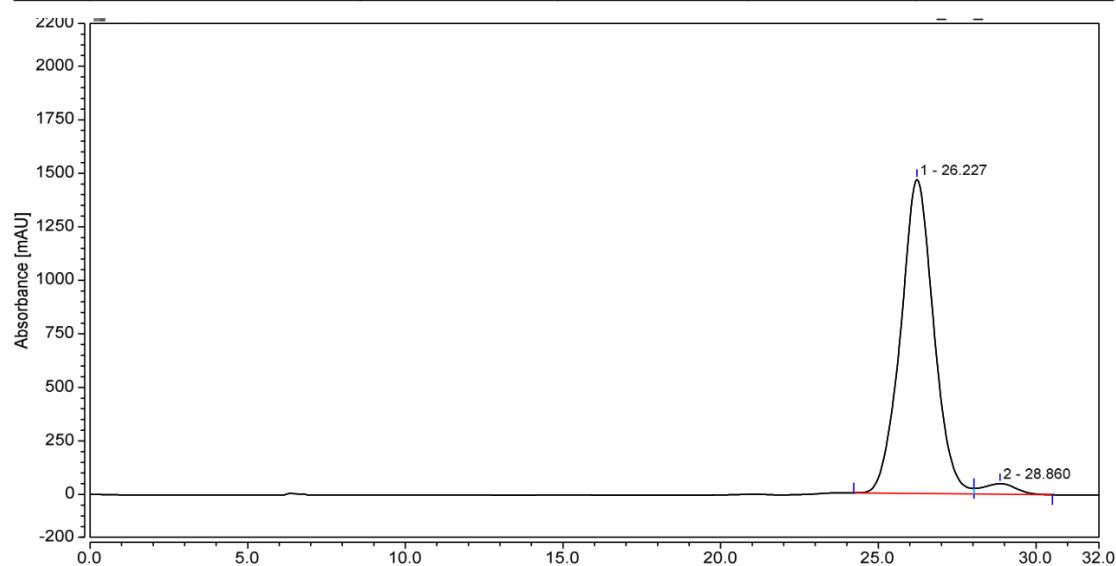

| Peak          | Retention Time min | Area mAU*min    | Height mAU      | Area %        | Height %      |
|---------------|--------------------|-----------------|-----------------|---------------|---------------|
| 1             | 26.227             | 1777.975        | 1466.861        | 96.69         | 96.70         |
| 2             | 28.860             | 60.960          | 50.022          | 3.31          | 3.30          |
| <b>Total:</b> |                    | <b>1838.935</b> | <b>1516.884</b> | <b>100.00</b> | <b>100.00</b> |

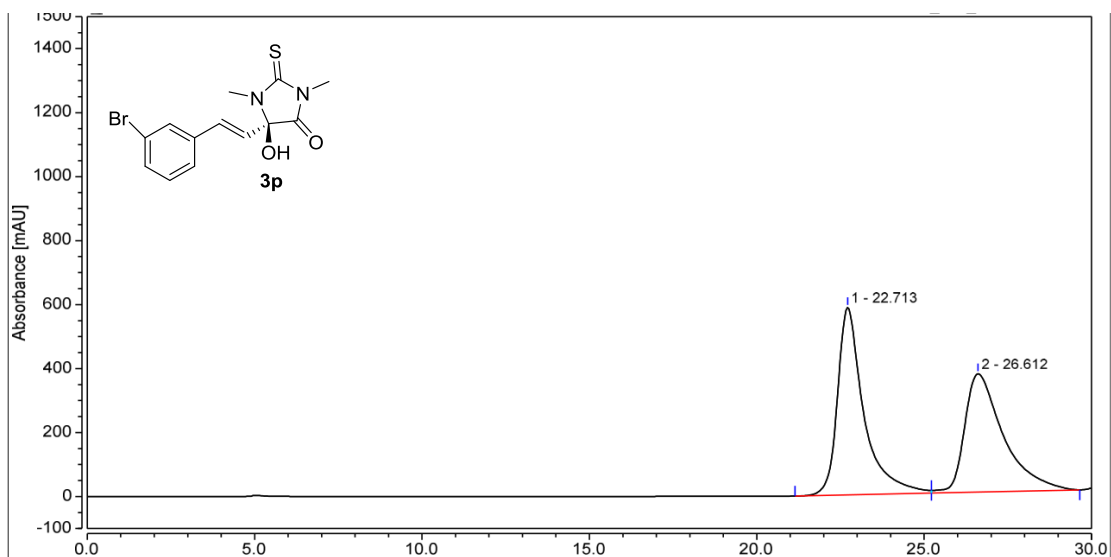

| Peak          | Retention Time min | Area mAU*min    | Height mAU     | Area %        | Height %      |
|---------------|--------------------|-----------------|----------------|---------------|---------------|
| 1             | 22.713             | 535.701         | 585.715        | 51.94         | 61.29         |
| 2             | 26.612             | 495.707         | 369.934        | 48.06         | 38.71         |
| <b>Total:</b> |                    | <b>1031.409</b> | <b>955.649</b> | <b>100.00</b> | <b>100.00</b> |

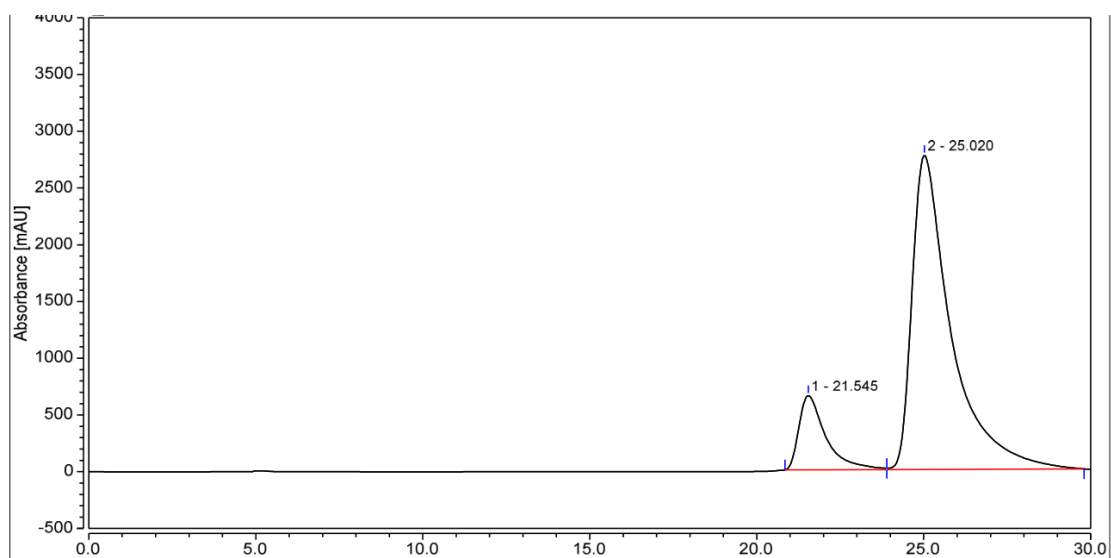

| Peak          | Retention Time min | Area mAU*min    | Height mAU      | Area %        | Height %      |
|---------------|--------------------|-----------------|-----------------|---------------|---------------|
| 1             | 21.545             | 610.002         | 654.845         | 14.01         | 19.13         |
| 2             | 25.020             | 3743.827        | 2768.548        | 85.99         | 80.87         |
| <b>Total:</b> |                    | <b>4353.829</b> | <b>3423.393</b> | <b>100.00</b> | <b>100.00</b> |

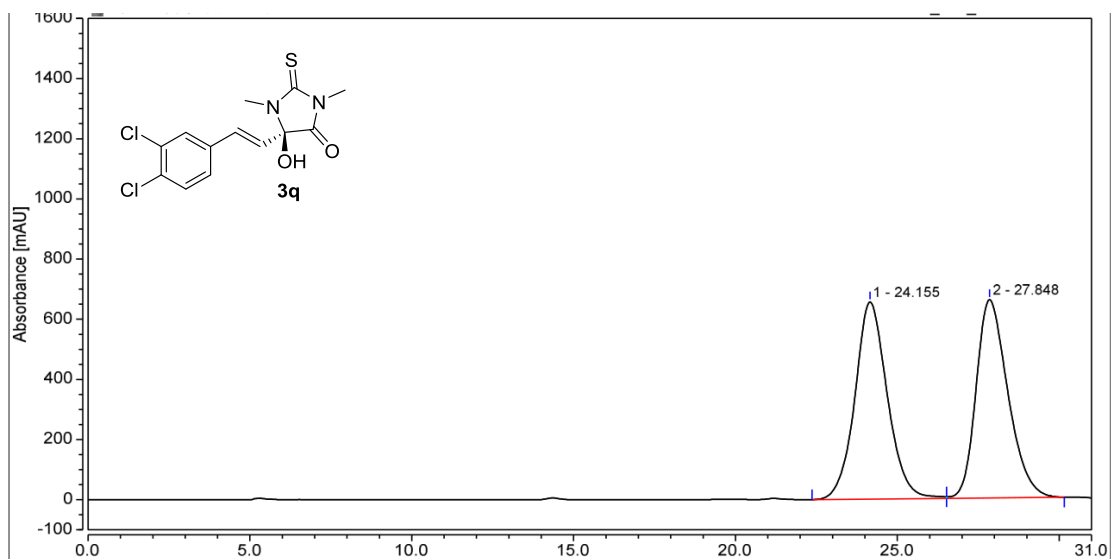

| Peak          | Retention Time<br>min | Area<br>mAU*min | Height<br>mAU   | Area<br>%     | Height<br>%   |
|---------------|-----------------------|-----------------|-----------------|---------------|---------------|
| 1             | 24.155                | 760.698         | 655.631         | 50.39         | 49.86         |
| 2             | 27.848                | 749.026         | 659.219         | 49.61         | 50.14         |
| <b>Total:</b> |                       | <b>1509.724</b> | <b>1314.849</b> | <b>100.00</b> | <b>100.00</b> |

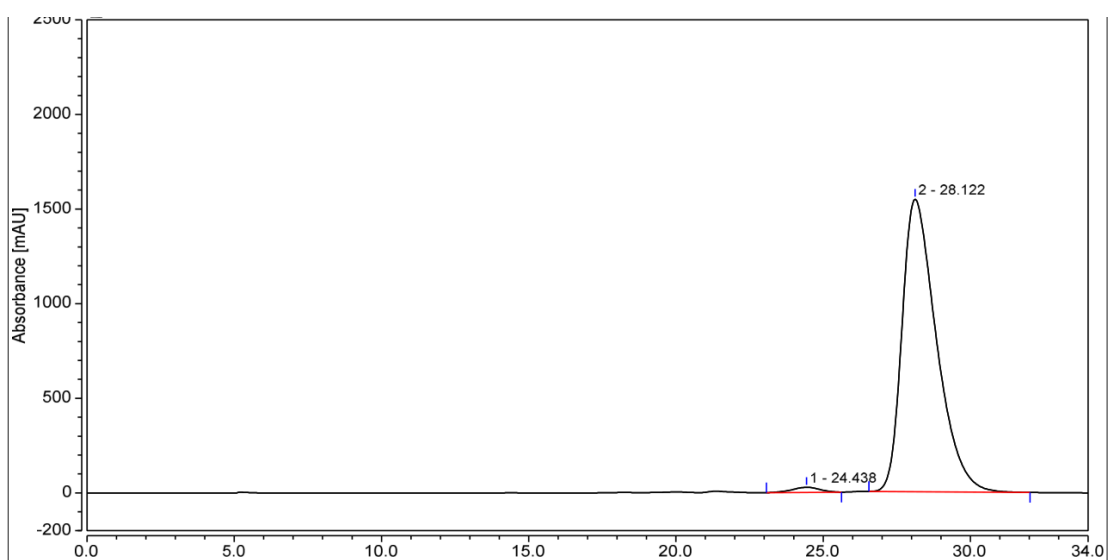

| Peak          | Retention Time<br>min | Area<br>mAU*min | Height<br>mAU   | Area<br>%     | Height<br>%   |
|---------------|-----------------------|-----------------|-----------------|---------------|---------------|
| 1             | 24.438                | 29.207          | 26.828          | 1.38          | 1.71          |
| 2             | 28.122                | 2093.024        | 1545.813        | 98.62         | 98.29         |
| <b>Total:</b> |                       | <b>2122.231</b> | <b>1572.641</b> | <b>100.00</b> | <b>100.00</b> |

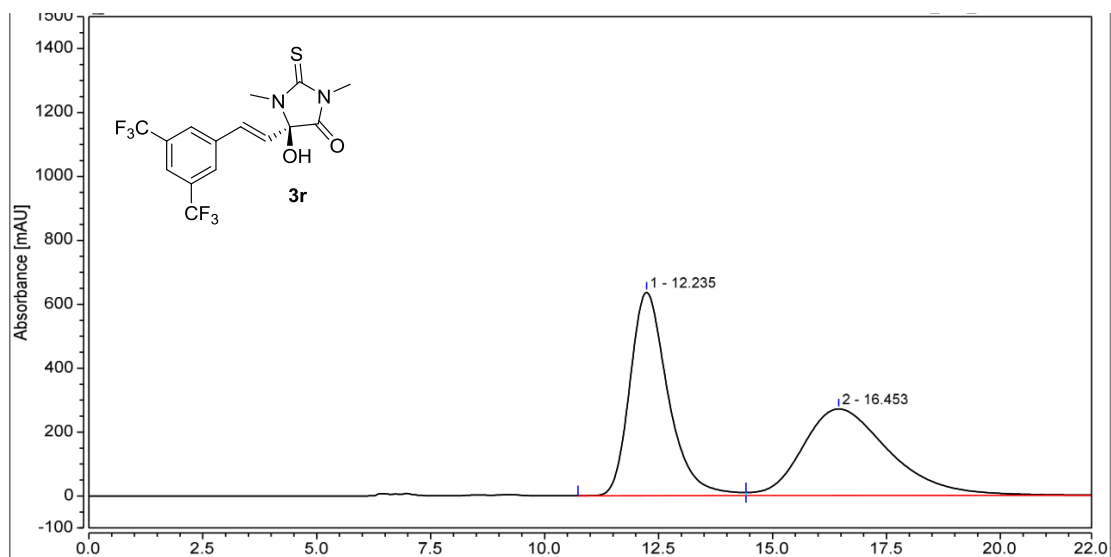

| Peak          | Retention Time<br>min | Area<br>mAU*min | Height<br>mAU  | Area<br>%     | Height<br>%   |
|---------------|-----------------------|-----------------|----------------|---------------|---------------|
| 1             | 12.235                | 616.941         | 636.617        | 50.81         | 70.14         |
| 2             | 16.453                | 597.157         | 270.983        | 49.19         | 29.86         |
| <b>Total:</b> |                       | <b>1214.098</b> | <b>907.600</b> | <b>100.00</b> | <b>100.00</b> |

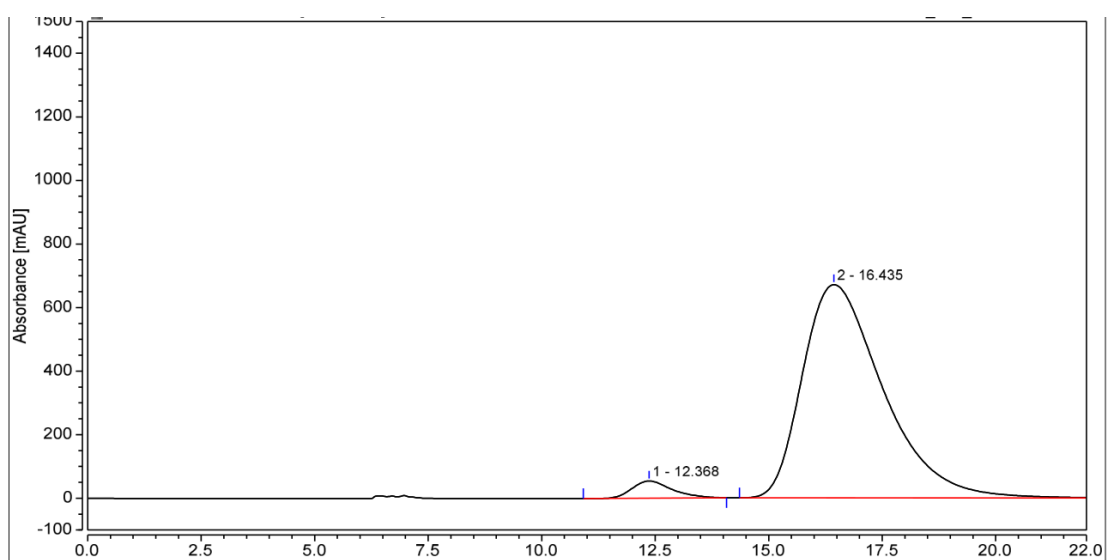

| Peak          | Retention Time<br>min | Area<br>mAU*min | Height<br>mAU  | Area<br>%     | Height<br>%   |
|---------------|-----------------------|-----------------|----------------|---------------|---------------|
| 1             | 12.368                | 54.949          | 54.134         | 3.82          | 7.46          |
| 2             | 16.435                | 1382.811        | 671.281        | 96.18         | 92.54         |
| <b>Total:</b> |                       | <b>1437.760</b> | <b>725.416</b> | <b>100.00</b> | <b>100.00</b> |



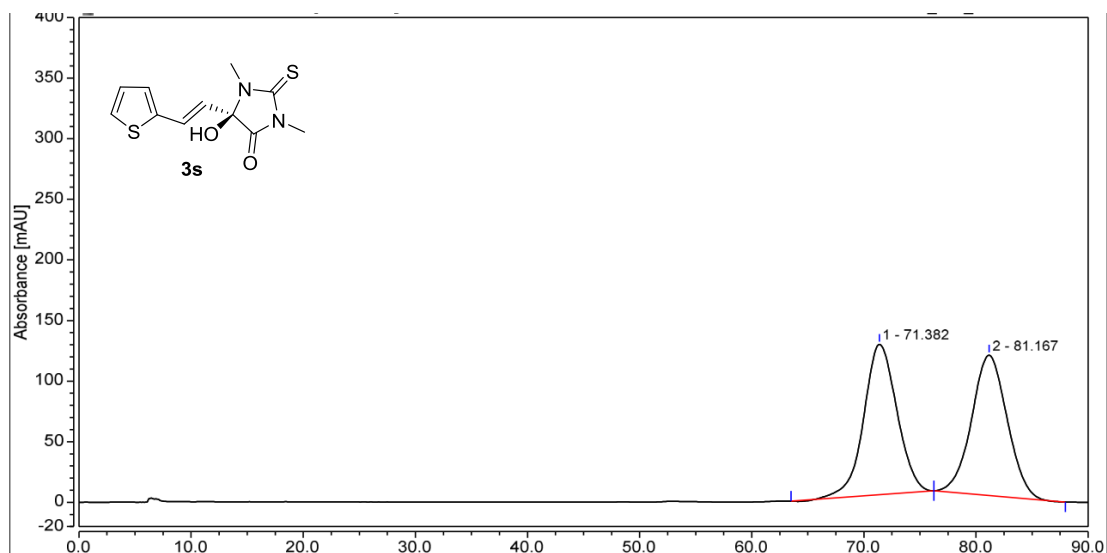

| Peak          | Retention Time min | Area mAU*min   | Height mAU     | Area %        | Height %      |
|---------------|--------------------|----------------|----------------|---------------|---------------|
| 1             | 71.382             | 425.024        | 124.132        | 50.00         | 51.71         |
| 2             | 81.167             | 424.992        | 115.923        | 50.00         | 48.29         |
| <b>Total:</b> |                    | <b>850.016</b> | <b>240.054</b> | <b>100.00</b> | <b>100.00</b> |

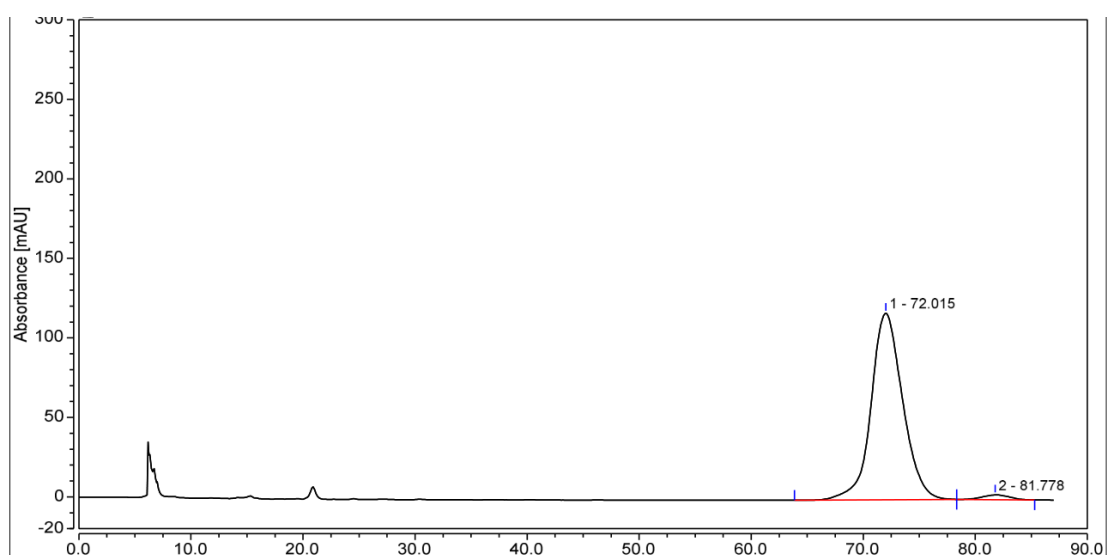

| Peak          | Retention Time min | Area mAU*min   | Height mAU     | Area %        | Height %      |
|---------------|--------------------|----------------|----------------|---------------|---------------|
| 1             | 72.015             | 383.609        | 117.377        | 97.86         | 97.49         |
| 2             | 81.778             | 8.375          | 3.018          | 2.14          | 2.51          |
| <b>Total:</b> |                    | <b>391.984</b> | <b>120.396</b> | <b>100.00</b> | <b>100.00</b> |

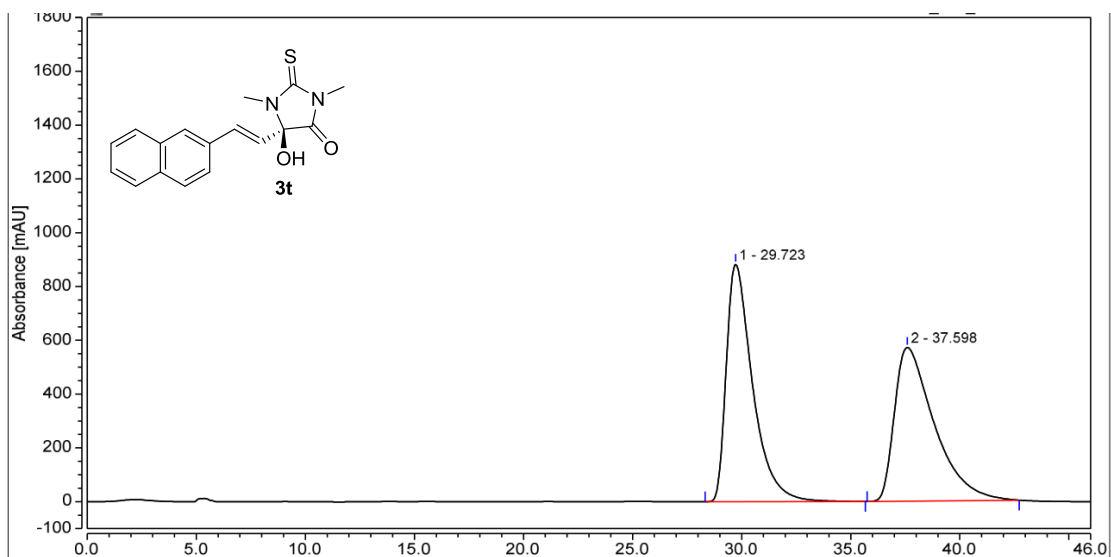

| Peak          | Retention Time<br>min | Area<br>mAU*min | Height<br>mAU   | Area<br>%     | Height<br>%   |
|---------------|-----------------------|-----------------|-----------------|---------------|---------------|
| 1             | 29.723                | 1235.849        | 882.955         | 50.54         | 60.69         |
| 2             | 37.598                | 1209.572        | 571.836         | 49.46         | 39.31         |
| <b>Total:</b> |                       | <b>2445.420</b> | <b>1454.792</b> | <b>100.00</b> | <b>100.00</b> |

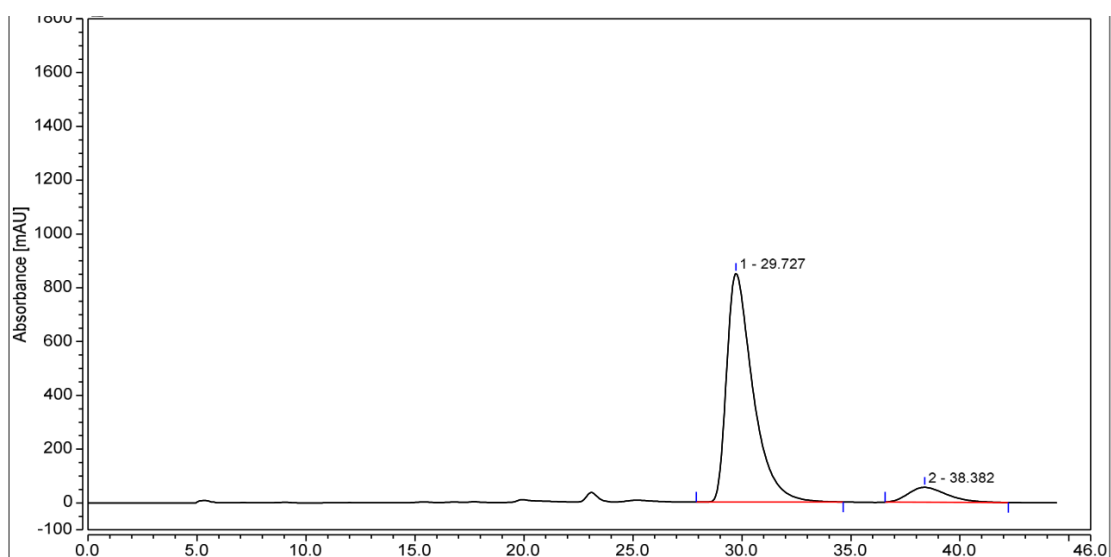

| Peak          | Retention Time<br>min | Area<br>mAU*min | Height<br>mAU  | Area<br>%     | Height<br>%   |
|---------------|-----------------------|-----------------|----------------|---------------|---------------|
| 1             | 29.727                | 1188.871        | 849.937        | 91.21         | 93.87         |
| 2             | 38.382                | 114.502         | 55.531         | 8.79          | 6.13          |
| <b>Total:</b> |                       | <b>1303.372</b> | <b>905.468</b> | <b>100.00</b> | <b>100.00</b> |

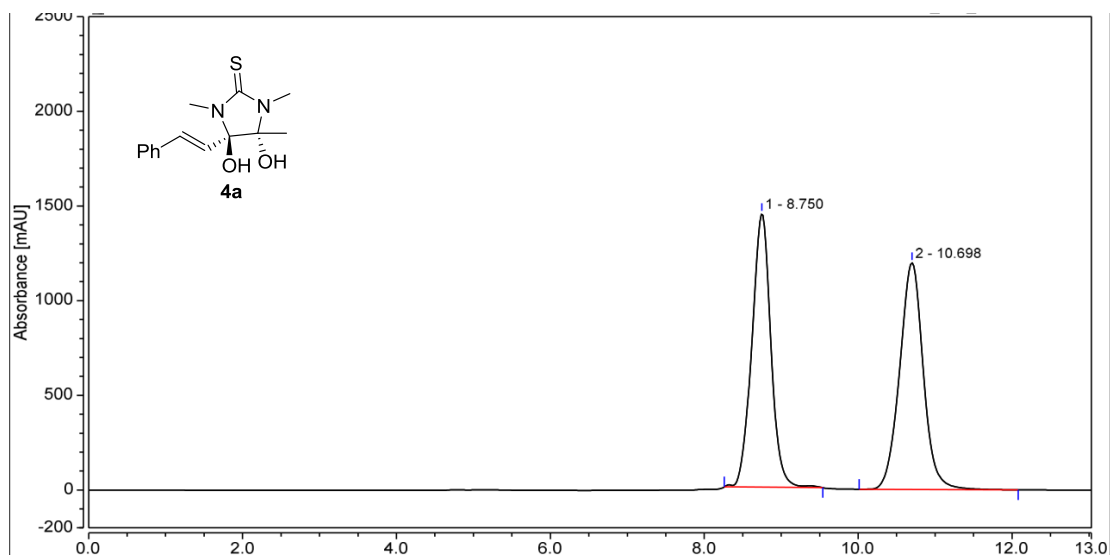

| Peak          | Retention Time<br>min | Area<br>mAU*min | Height<br>mAU   | Area<br>%     | Height<br>%   |
|---------------|-----------------------|-----------------|-----------------|---------------|---------------|
| 1             | 8.750                 | 415.071         | 1445.796        | 49.35         | 54.69         |
| 2             | 10.698                | 425.957         | 1197.802        | 50.65         | 45.31         |
| <b>Total:</b> |                       | <b>841.028</b>  | <b>2643.597</b> | <b>100.00</b> | <b>100.00</b> |

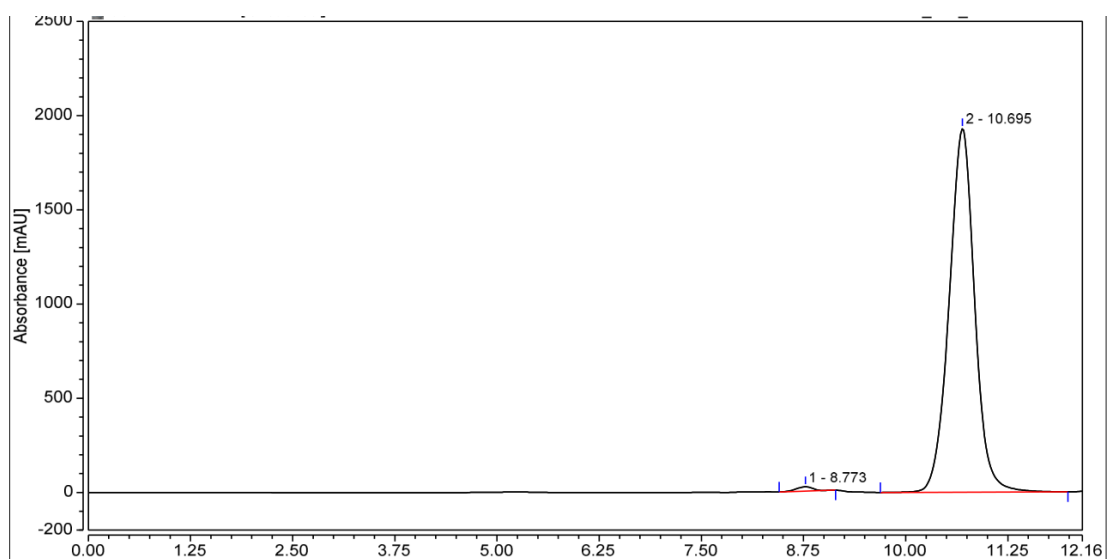

| Peak          | Retention Time<br>min | Area<br>mAU*min | Height<br>mAU   | Area<br>%     | Height<br>%   |
|---------------|-----------------------|-----------------|-----------------|---------------|---------------|
| 1             | 8.773                 | 5.501           | 23.136          | 0.78          | 1.18          |
| 2             | 10.695                | 699.438         | 1930.104        | 99.22         | 98.82         |
| <b>Total:</b> |                       | <b>704.940</b>  | <b>1953.240</b> | <b>100.00</b> | <b>100.00</b> |

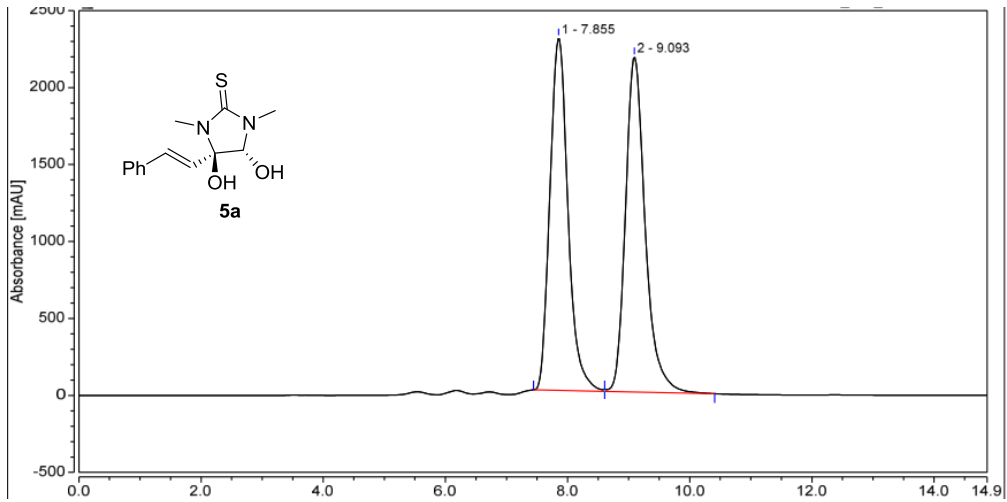

| Peak          | Retention Time<br>min | Area<br>mAU*min | Height<br>mAU   | Area<br>%     | Height<br>%   |
|---------------|-----------------------|-----------------|-----------------|---------------|---------------|
| 1             | 7.855                 | 784.885         | 2291.352        | 49.11         | 51.27         |
| 2             | 9.093                 | 813.467         | 2178.250        | 50.89         | 48.73         |
| <b>Total:</b> |                       | <b>1598.352</b> | <b>4469.602</b> | <b>100.00</b> | <b>100.00</b> |

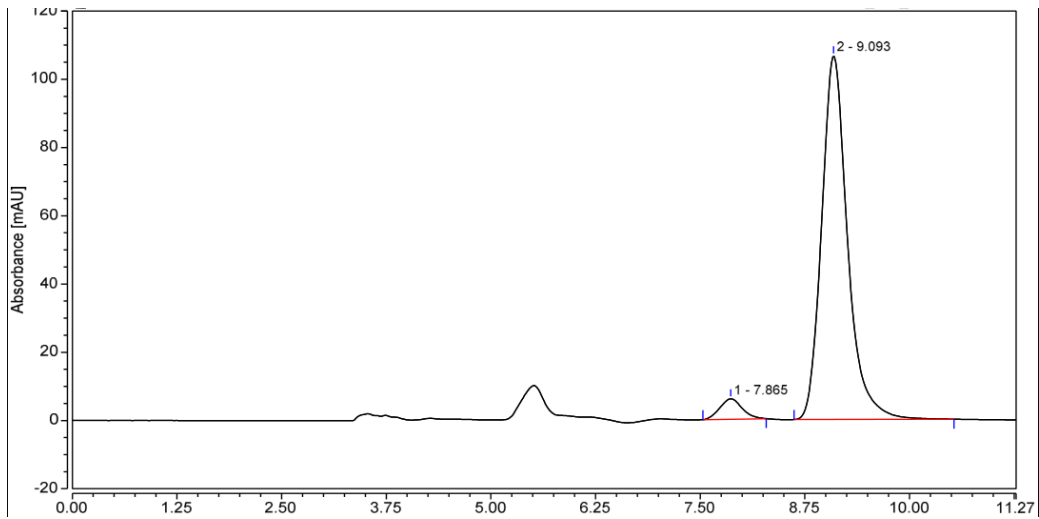

| Peak          | Retention Time<br>min | Area<br>mAU*min | Height<br>mAU  | Area<br>%     | Height<br>%   |
|---------------|-----------------------|-----------------|----------------|---------------|---------------|
| 1             | 7.865                 | 1.837           | 5.978          | 4.59          | 5.31          |
| 2             | 9.093                 | 38.209          | 106.595        | 95.41         | 94.69         |
| <b>Total:</b> |                       | <b>40.046</b>   | <b>112.573</b> | <b>100.00</b> | <b>100.00</b> |

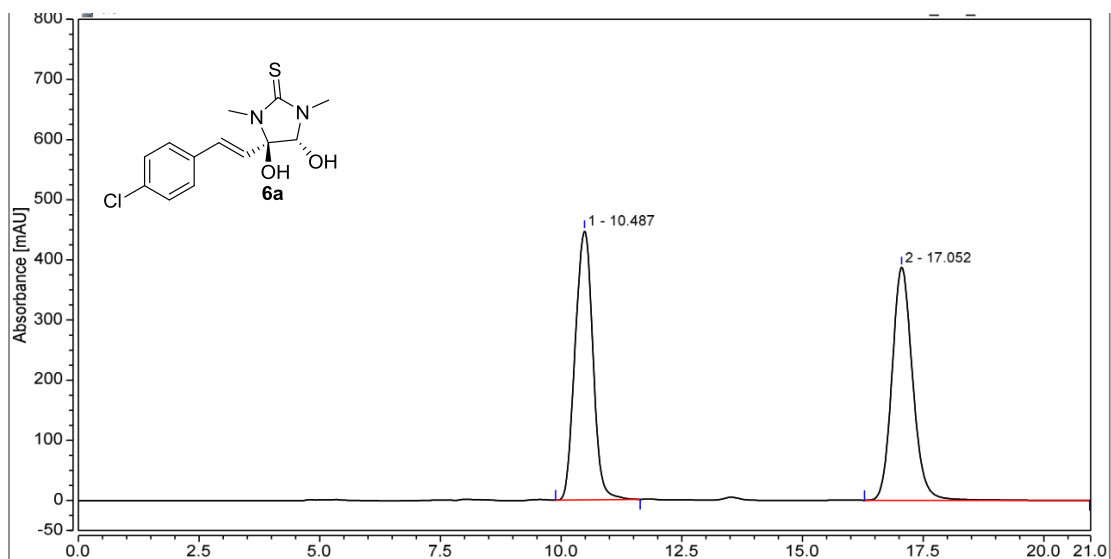

| Peak          | Retention Time<br>min | Area<br>mAU*min | Height<br>mAU  | Area<br>%     | Height<br>%   |
|---------------|-----------------------|-----------------|----------------|---------------|---------------|
| 1             | 10.487                | 190.737         | 447.712        | 49.82         | 53.57         |
| 2             | 17.052                | 192.128         | 387.971        | 50.18         | 46.43         |
| <b>Total:</b> |                       | <b>382.865</b>  | <b>835.683</b> | <b>100.00</b> | <b>100.00</b> |

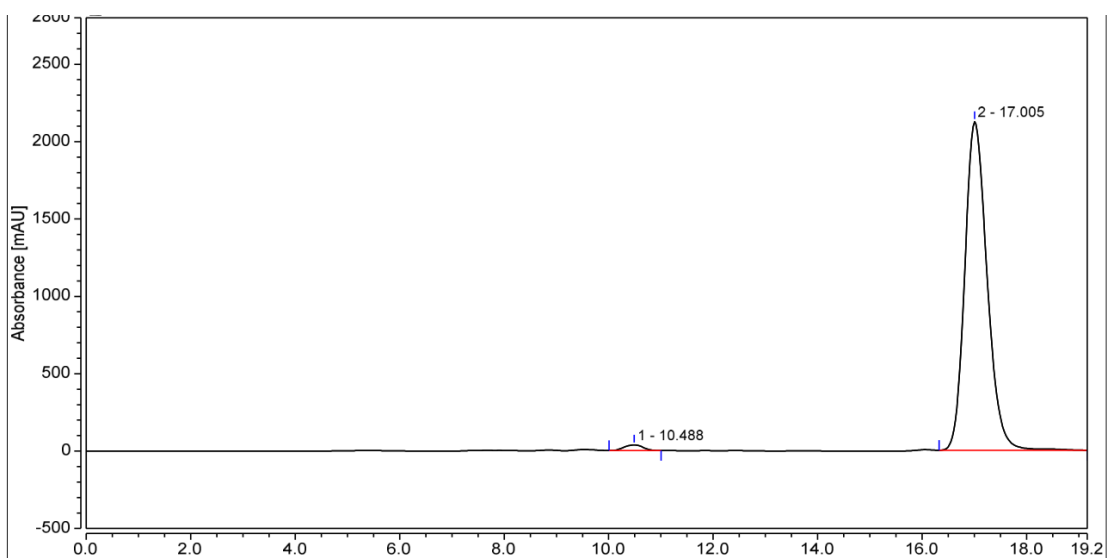

| Peak          | Retention Time<br>min | Area<br>mAU*min | Height<br>mAU   | Area<br>%     | Height<br>%   |
|---------------|-----------------------|-----------------|-----------------|---------------|---------------|
| 1             | 10.488                | 15.604          | 37.377          | 1.46          | 1.73          |
| 2             | 17.005                | 1053.159        | 2124.721        | 98.54         | 98.27         |
| <b>Total:</b> |                       | <b>1068.763</b> | <b>2162.098</b> | <b>100.00</b> | <b>100.00</b> |

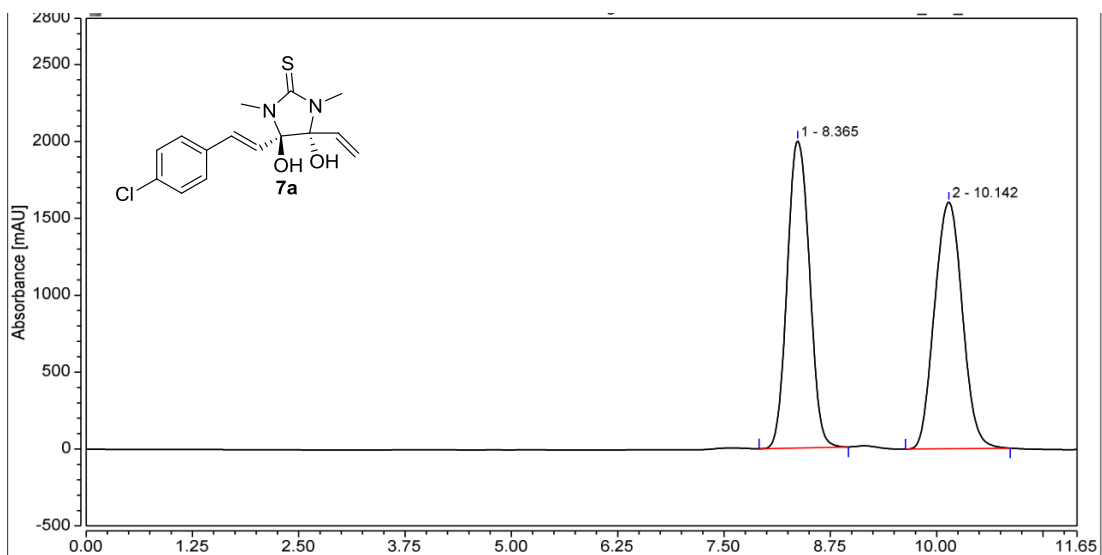

| Peak          | Retention Time<br>min | Area<br>mAU*min | Height<br>mAU   | Area<br>%     | Height<br>%   |
|---------------|-----------------------|-----------------|-----------------|---------------|---------------|
| 1             | 8.365                 | 605.198         | 1996.798        | 49.89         | 55.46         |
| 2             | 10.142                | 607.804         | 1603.744        | 50.11         | 44.54         |
| <b>Total:</b> |                       | <b>1213.002</b> | <b>3600.542</b> | <b>100.00</b> | <b>100.00</b> |

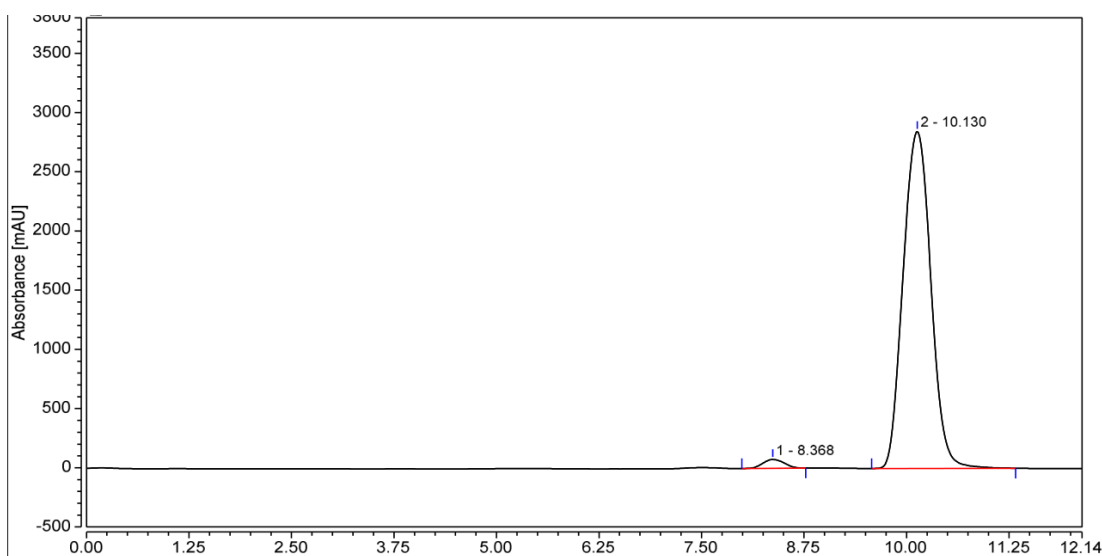

| Peak          | Retention Time<br>min | Area<br>mAU*min | Height<br>mAU   | Area<br>%     | Height<br>%   |
|---------------|-----------------------|-----------------|-----------------|---------------|---------------|
| 1             | 8.368                 | 22.436          | 73.732          | 1.97          | 2.52          |
| 2             | 10.130                | 1115.423        | 2847.026        | 98.03         | 97.48         |
| <b>Total:</b> |                       | <b>1137.858</b> | <b>2920.757</b> | <b>100.00</b> | <b>100.00</b> |
